# Supplementary material for: Brønsted acid-promoted hydroamination of unsaturated hydrazones: access to biologically important 5-arylpyrazolines
Source: Royal Society of Chemistry journal article supplement (doi:10.1039/d1ra03043d), 2021-01-01
Supplement: d1ra03043d1.pdf [file d1ra03043d1.pdf]

# **Brønsted Acid-Promoted Hydroamination of Unsaturated Hydrazones via an Ionic Pathway: Access to Biologically Important 5-Arylpyrazolines**

Han He, Ning Xu, Honglin Zhang, Bin Chen, Zhengnan Hu, Kang Guo, Jianlin Chun, Shujun Cao, and Yingguang Zhu\*

*Jiangsu Key Laboratory of Pesticide Science and Department of Chemistry, College of Sciences, Nanjing Agricultural University, Nanjing 210095, China*

E-mail: ygzhu@njau.edu.cn

## **Supporting Information**

### **Table of Contents**

|                                                        |     |
|--------------------------------------------------------|-----|
| General information.....                               | S2  |
| General procedure for the hydroamination reaction..... | S2  |
| Mechanistic studies.....                               | S2  |
| Characterization data.....                             | S4  |
| X-ray structure of product <b>2e</b> .....             | S17 |
| References.....                                        | S18 |
| NMR spectra.....                                       | S19 |

**General information.** All commercially available reagents were used without further purification. Column chromatography was performed on silica gel (200-300 mesh). <sup>1</sup>H NMR (400 MHz) and <sup>13</sup>C NMR (100 MHz) spectra were recorded on a 400 MHz spectrometer. Chemical shifts ( $\delta$ ) were reported in ppm, and coupling constants ( $J$ ) were given in Hertz (Hz). Data were reported as s = singlet, d = doublet, t = triplet, q = quartet, dd = doublet of doublets, m = multiplet. High-resolution mass spectra (HRMS) were recorded on an AB SCIEX Triple TOF 5600+ mass spectrometer. Melting points were uncorrected. Alkenyl hydrazone substrates **1a–1ac** were prepared according to the reported methods.<sup>1-4</sup>

**General procedure for the hydroamination reaction (Scheme 2).** To a reaction tube equipped with a magnetic stir bar were added alkenyl hydrazone **1** (0.20 mmol), conc. H<sub>2</sub>SO<sub>4</sub> (11  $\mu$ L, 0.20 mmol), and CH<sub>3</sub>CN (2.0 mL). The reaction mixture was stirred at 50 °C under nitrogen atmosphere for 12 h, cooled to room temperature, and concentrated under reduced pressure. The residue was purified by column chromatography on silica gel (eluent: petroleum ether/ethyl acetate = 10:1) to give product **2**.

### **Mechanistic studies**

**The experiment of the addition of radical scavenger BHT (Scheme 3a).** To a reaction tube equipped with a magnetic stir bar were added alkenyl hydrazone **1a** (78.1 mg, 0.20 mmol), conc. H<sub>2</sub>SO<sub>4</sub> (11  $\mu$ L, 0.20 mmol), BHT (121.2 mg, 0.60 mmol), and CH<sub>3</sub>CN (2.0 mL). The reaction mixture was stirred at 50 °C under nitrogen atmosphere for 12 h, cooled to room temperature, and concentrated under reduced pressure. The residue was purified by column chromatography on silica gel (eluent: petroleum ether/ethyl acetate = 10:1) to give product **2a** (71.5 mg, 92%) as a white solid. The addition of a radical scavenger did not inhibit the reaction, still generating product **2a** in 92% yield, which indicated a radical pathway might not be involved in the reaction process.

**Procedure for the preparation of intermediates Z-3 and E-3 from 1a (Scheme 3b).**

To a reaction tube equipped with a magnetic stir bar were added alkenyl hydrazone **1a** (781.2 mg, 2.0 mmol), conc. H<sub>2</sub>SO<sub>4</sub> (110 μL, 2.0 mmol), and CH<sub>3</sub>CN (20.0 mL). The reaction mixture was stirred at 50 °C under nitrogen atmosphere for a much shorter reaction time (0.5 h). Thin-layer chromatography (TLC) analysis indicated that substrate **1a** was completely consumed, and pyrazoline **2a** was not observed. The crude reaction mixture was concentrated under reduced pressure. The residue was purified by column chromatography on silica gel (eluent: petroleum ether/ethyl acetate = 20:1 ~ 10:1) to afford intermediate product Z-3 (228.6 mg, 29%, white solid) and E-3 (443.2 mg, 57%, white solid).

**Procedure for the preparation of pyrazoline product 2a from intermediate Z-3 (Scheme 3c).**

To a reaction tube equipped with a magnetic stir bar were added Z-3 (78.1 mg, 0.20 mmol), conc. H<sub>2</sub>SO<sub>4</sub> (11 μL, 0.20 mmol), and CH<sub>3</sub>CN (2.0 mL). The reaction mixture was stirred at 50 °C under nitrogen atmosphere for 12 h, cooled to room temperature, and concentrated under reduced pressure. The residue was purified by column chromatography on silica gel (eluent: petroleum ether/ethyl acetate = 10:1) to give product **2a** (70.1 mg, 90%) as a white solid.

**Procedure for the preparation of pyrazoline product 2a from intermediate E-3 (Scheme 3c).**

To a reaction tube equipped with a magnetic stir bar were added E-3 (78.1 mg, 0.20 mmol), H<sub>2</sub>SO<sub>4</sub> (11 μL, 0.20 mmol), and CH<sub>3</sub>CN (2.0 mL). The reaction mixture was stirred at 50 °C under nitrogen atmosphere for 12 h, cooled to room temperature, and concentrated under reduced pressure. The residue was purified by column chromatography on silica gel (eluent: petroleum ether/ethyl acetate = 10:1) to provide product **2a** (65.3 mg, 84%) as a white solid.

**The investigation of the formation of pyrazoline product 2a from the intermediate *Z*-3 or *E*-3 in the absence of H<sub>2</sub>SO<sub>4</sub> (Scheme 3d).**

To a reaction tube equipped with a magnetic stir bar were added *Z*-3 or *E*-3 (78.1 mg, 0.20 mmol) and CH<sub>3</sub>CN (2.0 mL). The reaction mixture was stirred at 50 °C under nitrogen atmosphere for 12 h and cooled to room temperature. Thin-layer chromatography (TLC) analysis indicated that the intermediate *Z*-3 or *E*-3 kept intact, and the formation of product 2a was not observed. The results suggest that the Brønsted acid plays an important role in the formation of the pyrazoline product from the intermediate.

### Characterization data

#### 5-methyl-3,5-diphenyl-1-tosyl-4,5-dihydro-1*H*-pyrazole (2a)

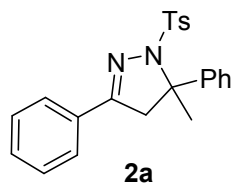

White solid (73.7 mg, 94%); mp 81–83 °C; <sup>1</sup>H NMR (400 MHz, CDCl<sub>3</sub>) δ 7.75 – 7.66 (m, 2H) 7.58 (d, *J* = 8.2 Hz, 2H), 7.45 – 7.38 (m, 3H), 7.36 – 7.30 (m, 2H), 7.27 – 7.19 (m, 3H), 7.14 (d, *J* = 8.1 Hz, 2H), 3.50 (d, *J* = 17.2 Hz, 1H), 3.37 (d, *J* = 17.2 Hz, 1H), 2.37 (s, 3H), 2.03 (s, 3H); <sup>13</sup>C NMR (100 MHz, CDCl<sub>3</sub>) δ 152.5, 143.4, 143.0, 136.9, 131.1, 130.1, 129.0, 128.6, 128.2, 127.60, 127.55, 126.5, 125.8, 71.8, 52.8, 25.2, 21.5; HRMS (ESI-TOF) *m/z*: [M+H]<sup>+</sup> calcd for C<sub>23</sub>H<sub>23</sub>N<sub>2</sub>O<sub>2</sub>S 391.1475, found 391.1478.

#### 3-(4-methoxyphenyl)-5-methyl-5-phenyl-1-tosyl-4,5-dihydro-1*H*-pyrazole (2b)

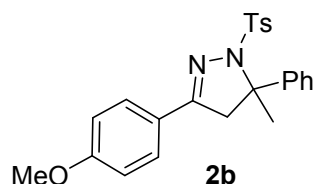

White solid (71.1 mg, 85%); mp 109–110 °C;  $^1\text{H}$  NMR (400 MHz,  $\text{CDCl}_3$ )  $\delta$  7.64 (d,  $J = 8.8$  Hz, 2H), 7.57 (d,  $J = 8.2$  Hz, 2H), 7.33 (dd,  $J = 7.6, 2.1$  Hz, 2H), 7.25 – 7.18 (m, 3H), 7.13 (d,  $J = 8.2$  Hz, 2H), 6.92 (d,  $J = 8.8$  Hz, 2H), 3.84 (s, 3H), 3.46 (d,  $J = 17.1$  Hz, 1H), 3.34 (d,  $J = 17.1$  Hz, 1H), 2.36 (s, 3H), 2.01 (s, 3H);  $^{13}\text{C}$  NMR (100 MHz,  $\text{CDCl}_3$ )  $\delta$  161.1, 152.3, 143.5, 142.9, 136.9, 128.9, 128.2, 128.1, 127.6, 127.5, 125.8, 123.8, 114.0, 71.6, 55.4, 53.0, 25.2, 21.5; HRMS (ESI-TOF)  $m/z$ :  $[\text{M}+\text{H}]^+$  calcd for  $\text{C}_{24}\text{H}_{25}\text{N}_2\text{O}_3\text{S}$  421.1580, found 421.1582.

### 5-methyl-5-phenyl-3-(*p*-tolyl)-1-tosyl-4,5-dihydro-1*H*-pyrazole (2c)

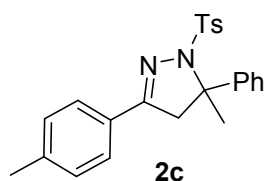

White solid (70.1 mg, 87%); mp 146–147 °C;  $^1\text{H}$  NMR (400 MHz,  $\text{CDCl}_3$ )  $\delta$  7.60 (d,  $J = 8.2$  Hz, 2H), 7.57 (d,  $J = 8.3$  Hz, 2H), 7.32 (dd,  $J = 7.7, 1.8$  Hz, 2H), 7.25 – 7.18 (m, 5H), 7.12 (d,  $J = 8.1$  Hz, 2H), 3.48 (d,  $J = 17.2$  Hz, 1H), 3.35 (d,  $J = 17.2$  Hz, 1H), 2.39 (s, 3H), 2.36 (s, 3H), 2.02 (s, 3H);  $^{13}\text{C}$  NMR (100 MHz,  $\text{CDCl}_3$ )  $\delta$  152.6, 143.4, 143.0, 140.4, 136.9, 129.3, 128.9, 128.3, 128.2, 127.6, 127.5, 126.5, 125.8, 71.6, 52.9, 25.3, 21.48, 21.45; HRMS (ESI-TOF)  $m/z$ :  $[\text{M}+\text{H}]^+$  calcd for  $\text{C}_{24}\text{H}_{25}\text{N}_2\text{O}_2\text{S}$  405.1631, found 405.1634.

### 3-(4-chlorophenyl)-5-methyl-5-phenyl-1-tosyl-4,5-dihydro-1*H*-pyrazole (2d)

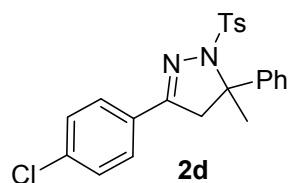

White solid (71.1 mg, 84%); mp 130–132 °C;  $^1\text{H}$  NMR (400 MHz,  $\text{CDCl}_3$ )  $\delta$  7.62 (d,  $J = 8.6$  Hz, 2H), 7.56 (d,  $J = 8.3$  Hz, 2H), 7.37 (d,  $J = 8.6$  Hz, 2H), 7.32 (dd,  $J = 7.6$ , 2.0 Hz, 3H), 7.27 – 7.19 (m, 2H), 7.15 (d,  $J = 8.1$  Hz, 2H), 3.46 (d,  $J = 17.2$  Hz, 1H), 3.34 (d,  $J = 17.2$  Hz, 1H), 2.37 (s, 3H), 2.03 (s, 3H);  $^{13}\text{C}$  NMR (100 MHz,  $\text{CDCl}_3$ )  $\delta$  151.3, 143.3, 143.2, 136.8, 136.0, 129.6, 129.0, 128.8, 128.3, 127.7, 127.64, 127.58, 125.7, 72.1, 52.7, 25.3, 21.5; HRMS (ESI-TOF)  $m/z$ :  $[\text{M}+\text{H}]^+$  calcd for  $\text{C}_{23}\text{H}_{22}\text{ClN}_2\text{O}_2\text{S}$  425.1085, found 425.1083.

### 3-(4-bromophenyl)-5-methyl-5-phenyl-1-tosyl-4,5-dihydro-1H-pyrazole (2e)

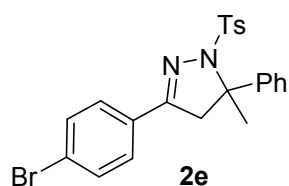

White solid (89.5 mg, 95%); mp 133–135 °C;  $^1\text{H}$  NMR (400 MHz,  $\text{CDCl}_3$ )  $\delta$  7.59 – 7.50 (m, 6H), 7.31 (dd,  $J = 7.6$ , 1.9 Hz, 2H), 7.28 – 7.20 (m, 3H), 7.14 (d,  $J = 8.1$  Hz, 2H), 3.46 (d,  $J = 17.2$  Hz, 1H), 3.34 (d,  $J = 17.2$  Hz, 1H), 2.37 (s, 3H), 2.03 (s, 3H);  $^{13}\text{C}$  NMR (100 MHz,  $\text{CDCl}_3$ )  $\delta$  151.4, 143.3, 143.2, 136.8, 131.8, 130.1, 129.0, 128.3, 127.9, 127.7, 127.6, 125.7, 124.4, 72.1, 52.7, 25.3, 21.5; HRMS (ESI-TOF)  $m/z$ :  $[\text{M}+\text{H}]^+$  calcd for  $\text{C}_{23}\text{H}_{22}\text{BrN}_2\text{O}_2\text{S}$  469.0580, found 469.0580.

### 5-methyl-5-phenyl-1-tosyl-3-(4-(trifluoromethyl)phenyl)-4,5-dihydro-1H-pyrazole (2f)

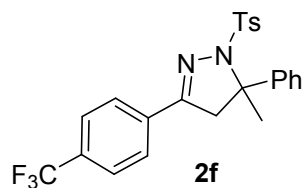

White solid (77.2 mg, 84%); mp 133–134 °C;  $^1\text{H}$  NMR (400 MHz,  $\text{CDCl}_3$ )  $\delta$  7.79 (d,  $J = 8.2$  Hz, 2H), 7.63 (d,  $J = 8.3$  Hz, 2H), 7.55 (d,  $J = 8.3$  Hz, 2H), 7.31 (dd,  $J = 7.7$ , 1.8 Hz, 2H), 7.26 – 7.18 (m, 3H), 7.14 (d,  $J = 8.1$  Hz, 2H), 3.49 (d,  $J = 17.3$  Hz, 1H), 3.38 (d,  $J = 17.3$  Hz, 1H), 2.36 (s, 3H), 2.03 (s, 3H);  $^{13}\text{C}$  NMR (100 MHz,  $\text{CDCl}_3$ )  $\delta$  151.0, 143.3, 143.1, 136.7, 134.4, 131.4 (q,  $J = 33.0$  Hz), 129.0, 128.3, 127.7, 127.5,

126.6, 125.6, 125.4 (q,  $J = 4.0$  Hz), 123.7 (q,  $J = 270.0$  Hz), 72.3, 52.5, 25.2, 21.4; HRMS (ESI-TOF)  $m/z$ :  $[M+H]^+$  calcd for  $C_{24}H_{22}F_3N_2O_2S$  459.1349, found 459.1348.

### 3-(3-chlorophenyl)-5-methyl-5-phenyl-1-tosyl-4,5-dihydro-1H-pyrazole (2g)

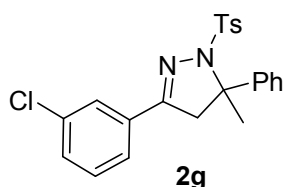

Yellow oil (84.0 mg, 99%);  $^1H$  NMR (400 MHz,  $CDCl_3$ )  $\delta$  7.69 (s, 1H), 7.55 (t,  $J = 9.2$  Hz, 3H), 7.39 – 7.31 (m, 3H), 7.31 (d,  $J = 2.0$  Hz, 1H), 7.28 – 7.20 (m, 3H), 7.16 (d,  $J = 8.1$  Hz, 2H), 3.47 (d,  $J = 17.3$  Hz, 1H), 3.34 (d,  $J = 17.3$  Hz, 1H), 2.38 (s, 3H), 2.04 (s, 3H);  $^{13}C$  NMR (100 MHz,  $CDCl_3$ )  $\delta$  151.1, 143.2, 136.8, 134.7, 132.9, 130.0, 129.9, 129.1, 128.3, 127.7, 127.6, 126.4, 125.7, 124.6, 72.1, 52.7, 25.3, 21.5; HRMS (ESI-TOF)  $m/z$ :  $[M+H]^+$  calcd for  $C_{23}H_{22}ClN_2O_2S$  425.1085, found 425.1087.

### 5-methyl-5-phenyl-3-(*o*-tolyl)-1-tosyl-4,5-dihydro-1H-pyrazole (2h)

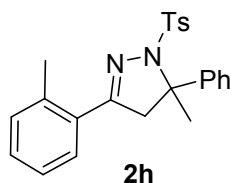

Yellow oil (59.2 mg, 73%);  $^1H$  NMR (400 MHz,  $CDCl_3$ )  $\delta$  7.58 (d,  $J = 8.1$  Hz, 2H), 7.36 (dd,  $J = 6.5, 2.8$  Hz, 2H), 7.29 – 7.21 (m, 6H), 7.19 (dd,  $J = 8.1, 4.3$  Hz, 1H), 7.14 (d,  $J = 8.2$  Hz, 2H), 3.54 (d,  $J = 17.0$  Hz, 1H), 3.40 (d,  $J = 17.0$  Hz, 1H), 2.65 (s, 3H), 2.37 (s, 3H), 2.04 (s, 3H);  $^{13}C$  NMR (100 MHz,  $CDCl_3$ )  $\delta$  153.3, 143.6, 143.2, 138.1, 136.6, 131.8, 129.8, 129.3, 128.9, 128.5, 128.3, 127.9, 127.5, 125.8, 70.8, 55.1, 25.0, 23.6, 21.5; HRMS (ESI-TOF)  $m/z$ :  $[M+H]^+$  calcd for  $C_{24}H_{25}N_2O_2S$  405.1631, found 405.1633.

### 3-(2-chlorophenyl)-5-methyl-5-phenyl-1-tosyl-4,5-dihydro-1H-pyrazole (2i)

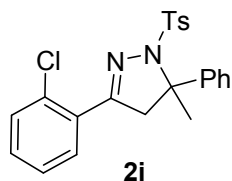

White solid (71.8 mg, 85%); mp 116–118 °C; <sup>1</sup>H NMR (400 MHz, CDCl<sub>3</sub>) δ 7.77 – 7.68 (m, 1H), 7.59 (d, *J* = 8.2 Hz, 2H), 7.43 – 7.33 (m, 3H), 7.33 – 7.27 (m, 2H), 7.25 (q, *J* = 3.7 Hz, 3H), 7.15 (d, *J* = 8.1 Hz, 2H), 3.66 (d, *J* = 17.6 Hz, 1H), 3.54 (d, *J* = 17.6 Hz, 1H), 2.37 (s, 3H), 2.01 (s, 3H); <sup>13</sup>C NMR (100 MHz, CDCl<sub>3</sub>) δ 152.3, 143.2, 143.2, 136.8, 132.6, 130.7, 130.6, 130.4, 130.3, 128.9, 128.2, 127.7, 127.6, 126.8, 125.7, 72.5, 55.5, 24.8, 21.5; HRMS (ESI-TOF) *m/z*: [M+H]<sup>+</sup> calcd for C<sub>23</sub>H<sub>22</sub>ClN<sub>2</sub>O<sub>2</sub>S 425.1085, found 425.1085.

**5-methyl-3-(naphthalen-2-yl)-5-phenyl-1-tosyl-4,5-dihydro-1H-pyrazole (2j)**

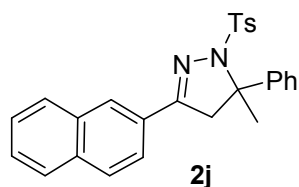

White solid (77.5 mg, 88%); mp 169–170 °C; <sup>1</sup>H NMR (400 MHz, CDCl<sub>3</sub>) δ 8.08 (dd, *J* = 8.7, 1.6 Hz, 1H), 7.92 – 7.83 (m, 3H), 7.83 – 7.78 (m, 1H), 7.60 (d, *J* = 8.3 Hz, 2H), 7.56 – 7.46 (m, 2H), 7.35 (dd, *J* = 7.7, 1.9 Hz, 2H), 7.29 – 7.19 (m, 3H), 7.15 (d, *J* = 8.1 Hz, 2H), 3.64 (d, *J* = 17.1 Hz, 1H), 3.51 (d, *J* = 17.1 Hz, 1H), 2.36 (s, 3H), 2.07 (s, 3H); <sup>13</sup>C NMR (100 MHz, CDCl<sub>3</sub>) δ 152.6, 143.4, 143.1, 136.9, 134.0, 132.9, 129.0, 128.8, 128.4, 128.31, 128.29, 127.8, 127.64, 127.62, 127.2, 126.71, 126.69, 125.8, 123.5, 72.0, 52.8, 25.4, 21.5; HRMS (ESI-TOF) *m/z*: [M+H]<sup>+</sup> calcd for C<sub>27</sub>H<sub>25</sub>N<sub>2</sub>O<sub>2</sub>S 441.1631, found 441.1632.

**5-methyl-5-phenyl-3-(thiophen-2-yl)-1-tosyl-4,5-dihydro-1H-pyrazole (2k)**

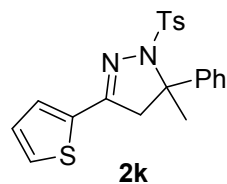



White solid (63.9 mg, 81%); mp 162–163 °C;  $^1\text{H}$  NMR (400 MHz,  $\text{CDCl}_3$ )  $\delta$  7.55 (d,  $J = 8.1$  Hz, 2H), 7.41 (d,  $J = 5.0$  Hz, 1H), 7.32 (d,  $J = 6.4$  Hz, 2H), 7.28 – 7.18 (m, 3H), 7.13 (d,  $J = 7.8$  Hz, 3H), 7.07 – 7.00 (m, 1H), 3.48 (d,  $J = 17.0$  Hz, 1H), 3.36 (d,  $J = 17.0$  Hz, 1H), 2.36 (s, 3H), 2.01 (s, 3H);  $^{13}\text{C}$  NMR (100 MHz,  $\text{CDCl}_3$ )  $\delta$  148.4, 143.1, 143.0, 136.7, 134.7, 128.9, 128.6, 128.2, 128.1, 127.6, 127.4, 125.8, 72.0, 53.4, 25.2, 21.5; HRMS (ESI-TOF)  $m/z$ :  $[\text{M}+\text{H}]^+$  calcd for  $\text{C}_{21}\text{H}_{21}\text{N}_2\text{O}_2\text{S}_2$  397.1039, found 397.1040.

### 5-methyl-3-pentyl-5-phenyl-1-tosyl-4,5-dihydro-1H-pyrazole (2l)

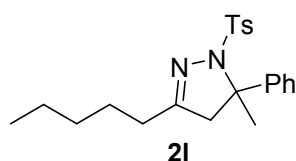

Yellow oil (75.6 mg, 98%);  $^1\text{H}$  NMR (400 MHz,  $\text{CDCl}_3$ )  $\delta$  7.54 (d,  $J = 8.3$  Hz, 2H), 7.34 – 7.27 (m, 2H), 7.25 – 7.19 (m, 3H), 7.14 (d,  $J = 8.1$  Hz, 2H), 3.04 (d,  $J = 17.6$  Hz, 1H), 2.91 (d,  $J = 17.6$  Hz, 1H), 2.38 (s, 3H), 2.34 (t,  $J = 7.7$  Hz, 2H), 1.88 (s, 3H), 1.61 – 1.49 (m, 2H), 1.38 – 1.23 (m, 4H), 0.88 (t,  $J = 6.9$  Hz, 3H);  $^{13}\text{C}$  NMR (100 MHz,  $\text{CDCl}_3$ )  $\delta$  157.5, 143.7, 142.8, 137.1, 128.8, 128.1, 127.5, 127.3, 125.6, 70.8, 55.2, 31.3, 30.0, 25.8, 24.9, 22.3, 21.4, 13.9; HRMS (ESI-TOF)  $m/z$ :  $[\text{M}+\text{H}]^+$  calcd for  $\text{C}_{22}\text{H}_{29}\text{N}_2\text{O}_2\text{S}$  385.1944, found 385.1947.

### 3-isopropyl-5-methyl-5-phenyl-1-tosyl-4,5-dihydro-1H-pyrazole (2m)

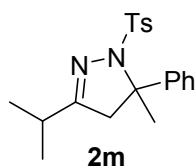

White solid (63.6 mg, 89%); mp 121–123 °C;  $^1\text{H}$  NMR (400 MHz,  $\text{CDCl}_3$ )  $\delta$  7.53 (d,  $J = 8.3$  Hz, 2H), 7.32 – 7.26 (m, 2H), 7.25 – 7.18 (m, 3H), 7.13 (d,  $J = 8.1$  Hz, 2H), 3.04 (d,  $J = 17.5$  Hz, 1H), 2.92 (d,  $J = 17.5$  Hz, 1H), 2.75 – 2.62 (m, 1H), 2.37 (s, 3H), 1.86 (s, 3H), 1.15 (d,  $J = 6.9$  Hz, 6H);  $^{13}\text{C}$  NMR (100 MHz,  $\text{CDCl}_3$ )  $\delta$  161.9, 143.6,

142.7, 136.9, 128.7, 128.0, 127.5, 127.2, 125.5, 70.9, 52.9, 29.7, 24.6, 21.4, 19.8, 19.7;  
HRMS (ESI-TOF) m/z: [M+H]<sup>+</sup> calcd for C<sub>20</sub>H<sub>25</sub>N<sub>2</sub>O<sub>2</sub>S 357.1631, found 357.1633.

### 3-cyclopropyl-5-methyl-5-phenyl-1-tosyl-4,5-dihydro-1H-pyrazole (2n)

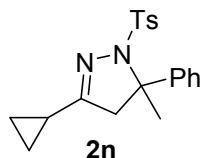

White solid (45.7 mg, 65%); mp 100–101 °C; <sup>1</sup>H NMR (400 MHz, CDCl<sub>3</sub>) δ 7.52 (d, *J* = 8.1 Hz, 2H), 7.33 – 7.27 (m, 2H), 7.25 – 7.20 (m, 3H), 7.14 (d, *J* = 8.0 Hz, 2H), 2.88 (d, *J* = 17.2 Hz, 1H), 2.75 (d, *J* = 17.2 Hz, 1H), 2.38 (s, 3H), 1.90 (s, 3H), 1.86 – 1.76 (m, 1H), 0.96 – 0.82 (m, 2H), 0.80 – 0.66 (m, 2H); <sup>13</sup>C NMR (100 MHz, CDCl<sub>3</sub>) δ 159.0, 143.5, 142.8, 136.9, 128.9, 128.1, 127.6, 127.4, 125.6, 70.7, 52.7, 24.8, 21.5, 11.5, 6.5, 6.3; HRMS (ESI-TOF) m/z: [M+H]<sup>+</sup> calcd for C<sub>20</sub>H<sub>23</sub>N<sub>2</sub>O<sub>2</sub>S 355.1475, found 355.1472.

### 3-cyclopentyl-5-methyl-5-phenyl-1-tosyl-4,5-dihydro-1H-pyrazole (2o)

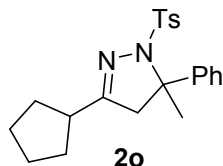

White solid (71.1 mg, 90%); mp 48–49 °C; <sup>1</sup>H NMR (400 MHz, CDCl<sub>3</sub>) δ 7.53 (d, *J* = 8.0 Hz, 2H), 7.33 – 7.27 (m, 2H), 7.25 – 7.18 (m, 3H), 7.13 (d, *J* = 8.0 Hz, 2H), 3.05 (d, *J* = 17.4 Hz, 1H), 2.91 (d, *J* = 17.4 Hz, 1H), 2.87 – 2.78 (m, 1H), 2.38 (s, 3H), 1.87 – 1.81 (m, 5H), 1.74 – 1.52 (m, 6H); <sup>13</sup>C NMR (100 MHz, CDCl<sub>3</sub>) δ 160.4, 143.7, 142.8, 137.0, 128.8, 128.1, 127.6, 127.3, 125.6, 70.9, 53.7, 40.4, 30.2, 30.1, 25.3, 24.7, 21.5; HRMS (ESI-TOF) m/z: [M+H]<sup>+</sup> calcd for C<sub>22</sub>H<sub>27</sub>N<sub>2</sub>O<sub>2</sub>S 383.1788, found 383.1789.

### 3-cyclohexyl-5-methyl-5-phenyl-1-tosyl-4,5-dihydro-1H-pyrazole (2p)

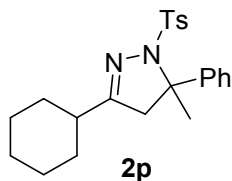

White solid (77.5 mg, 98%); mp 97–98 °C;  $^1\text{H}$  NMR (400 MHz,  $\text{CDCl}_3$ )  $\delta$  7.52 (d,  $J$  = 8.3 Hz, 2H), 7.31 – 7.25 (m, 2H), 7.24 – 7.16 (m, 3H), 7.12 (d,  $J$  = 8.0 Hz, 2H), 3.04 (d,  $J$  = 17.5 Hz, 1H), 2.91 (d,  $J$  = 17.5 Hz, 1H), 2.44 – 2.39 (m, 1H), 2.37 (s, 3H), 1.87 (s, 3H), 1.86 – 1.64 (m, 5H), 1.41 – 1.17 (m, 5H);  $^{13}\text{C}$  NMR (100 MHz,  $\text{CDCl}_3$ )  $\delta$  161.1, 143.6, 142.7, 137.0, 128.8, 128.1, 127.5, 127.3, 125.6, 70.6, 53.4, 39.2, 30.1, 30.0, 25.8, 25.63, 25.61, 24.8, 21.5; HRMS (ESI-TOF)  $m/z$ :  $[\text{M}+\text{H}]^+$  calcd for  $\text{C}_{23}\text{H}_{29}\text{N}_2\text{O}_2\text{S}$  397.1944, found 397.1946.

### 3-(*tert*-butyl)-5-methyl-5-phenyl-1-tosyl-4,5-dihydro-1H-pyrazole (2q)

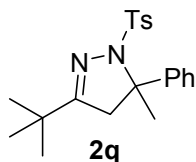

White solid (63.7 mg, 86%); mp 83–85 °C;  $^1\text{H}$  NMR (400 MHz,  $\text{CDCl}_3$ )  $\delta$  7.55 (d,  $J$  = 8.3 Hz, 2H), 7.32 – 7.27 (m, 2H), 7.24 – 7.20 (m, 3H), 7.14 (d,  $J$  = 8.0 Hz, 2H), 3.07 (d,  $J$  = 17.3 Hz, 1H), 2.94 (d,  $J$  = 17.3 Hz, 1H), 2.38 (s, 3H), 1.84 (s, 3H), 1.18 (s, 9H);  $^{13}\text{C}$  NMR (100 MHz,  $\text{CDCl}_3$ )  $\delta$  164.1, 143.7, 142.8, 137.0, 128.7, 128.1, 127.7, 127.3, 125.6, 71.5, 52.1, 34.1, 27.8, 24.5, 21.5; HRMS (ESI-TOF)  $m/z$ :  $[\text{M}+\text{H}]^+$  calcd for  $\text{C}_{21}\text{H}_{27}\text{N}_2\text{O}_2\text{S}$  371.1788, found 371.1785.

### 5-methyl-3-phenyl-5-(*p*-tolyl)-1-tosyl-4,5-dihydro-1H-pyrazole (2r)

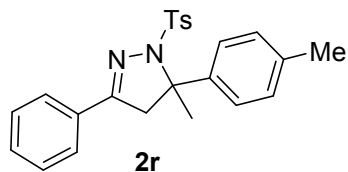

White solid (78.8 mg, 97%); mp 137–138 °C;  $^1\text{H}$  NMR (400 MHz,  $\text{CDCl}_3$ )  $\delta$  7.75 – 7.67 (m, 2H), 7.57 (d,  $J$  = 8.3 Hz, 2H), 7.45 – 7.37 (m, 3H), 7.21 (d,  $J$  = 8.2 Hz, 2H), 7.13 (d,  $J$  = 8.1 Hz, 2H), 7.01 (d,  $J$  = 8.0 Hz, 2H), 3.49 (d,  $J$  = 17.2 Hz, 1H), 3.36 (d,  $J$

= 17.2 Hz, 1H), 2.37 (s, 3H), 2.33 (s, 3H), 2.01 (s, 3H);  $^{13}\text{C}$  NMR (100 MHz,  $\text{CDCl}_3$ )  $\delta$  152.5, 142.9, 140.4, 137.3, 136.9, 131.1, 130.1, 128.82, 128.79, 128.6, 127.5, 126.5, 125.7, 71.7, 52.7, 25.3, 21.5, 21.0; HRMS (ESI-TOF)  $m/z$ :  $[\text{M}+\text{H}]^+$  calcd for  $\text{C}_{24}\text{H}_{25}\text{N}_2\text{O}_2\text{S}$  405.1631, found 405.1630.

**5-(4-chlorophenyl)-5-methyl-3-phenyl-1-tosyl-4,5-dihydro-1H-pyrazole (2s)**

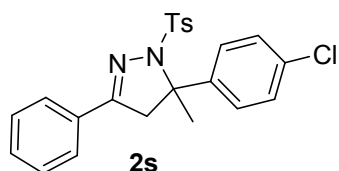

White solid (83.5 mg, 98%); mp 70–71 °C;  $^1\text{H}$  NMR (400 MHz,  $\text{CDCl}_3$ )  $\delta$  7.75 – 7.63 (m, 2H), 7.58 (d,  $J$  = 8.3 Hz, 2H), 7.45 – 7.38 (m, 3H), 7.28 – 7.21 (m, 2H), 7.20 – 7.12 (m, 4H), 3.45 (d,  $J$  = 17.2 Hz, 1H), 3.37 (d,  $J$  = 17.2 Hz, 1H), 2.38 (s, 3H), 2.01 (s, 3H);  $^{13}\text{C}$  NMR (100 MHz,  $\text{CDCl}_3$ )  $\delta$  152.5, 143.3, 141.9, 136.7, 133.6, 130.9, 130.3, 129.0, 128.7, 128.3, 127.5, 127.2, 126.5, 71.3, 52.6, 25.2, 21.5; HRMS (ESI-TOF)  $m/z$ :  $[\text{M}+\text{H}]^+$  calcd for  $\text{C}_{23}\text{H}_{22}\text{ClN}_2\text{O}_2\text{S}$  425.1085, found 425.1083.

**5-(4-bromophenyl)-5-methyl-3-phenyl-1-tosyl-4,5-dihydro-1H-pyrazole (2t)**

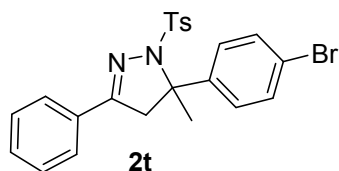

White solid (89.6 mg, 95%); mp 67–69 °C;  $^1\text{H}$  NMR (400 MHz,  $\text{CDCl}_3$ )  $\delta$  7.74 – 7.67 (m, 2H), 7.58 (d,  $J$  = 8.4 Hz, 2H), 7.45 – 7.38 (m, 3H), 7.34 – 7.27 (m, 2H), 7.21 – 7.13 (m, 4H), 3.45 (d,  $J$  = 17.2 Hz, 1H), 3.37 (d,  $J$  = 17.2 Hz, 1H), 2.39 (s, 3H), 2.00 (s, 3H);  $^{13}\text{C}$  NMR (100 MHz,  $\text{CDCl}_3$ )  $\delta$  152.6, 143.3, 142.3, 136.6, 131.2, 130.8, 130.3, 129.0, 128.6, 127.5, 127.4, 126.5, 121.7, 71.3, 52.5, 25.1, 21.5; HRMS (ESI-TOF)  $m/z$ :  $[\text{M}+\text{H}]^+$  calcd for  $\text{C}_{23}\text{H}_{22}\text{BrN}_2\text{O}_2\text{S}$  469.0580, found 469.0578.

**5-(4-fluorophenyl)-5-methyl-3-phenyl-1-tosyl-4,5-dihydro-1H-pyrazole (2u)**

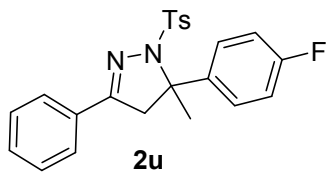

White solid (80.2 mg, 98%); mp 130–131 °C;  $^1\text{H}$  NMR (400 MHz,  $\text{CDCl}_3$ )  $\delta$  7.74 – 7.66 (m, 2H), 7.58 (d,  $J = 8.3$  Hz, 2H), 7.45 – 7.37 (m, 3H), 7.33 – 7.26 (m, 2H), 7.16 (d,  $J = 8.1$  Hz, 2H), 6.95 – 6.82 (m, 2H), 3.47 (d,  $J = 17.2$  Hz, 1H), 3.37 (d,  $J = 17.2$  Hz, 1H), 2.37 (s, 3H), 2.02 (s, 3H);  $^{13}\text{C}$  NMR (100 MHz,  $\text{CDCl}_3$ )  $\delta$  162.1 (d,  $J = 245.0$  Hz), 152.5, 143.3, 139.3 (d,  $J = 3.0$  Hz), 136.8, 131.1, 130.2, 129.0, 128.6, 127.6 (d,  $J = 8.0$  Hz), 127.5, 126.5, 115.0 (d,  $J = 21.0$  Hz), 71.3, 52.7, 25.5, 21.5; HRMS (ESI-TOF)  $m/z$ :  $[\text{M}+\text{H}]^+$  calcd for  $\text{C}_{23}\text{H}_{22}\text{FN}_2\text{O}_2\text{S}$  409.1381, found 409.1382.

**5-(3,4-dichlorophenyl)-5-methyl-3-phenyl-1-tosyl-4,5-dihydro-1H-pyrazole (2v)**

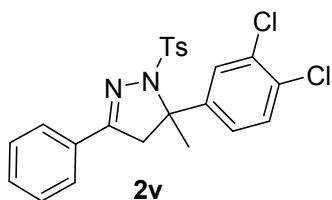

White solid (77.7 mg, 85%); mp 152–153 °C;  $^1\text{H}$  NMR (400 MHz,  $\text{CDCl}_3$ )  $\delta$  7.74 – 7.65 (m, 2H), 7.60 (d,  $J = 8.1$  Hz, 2H), 7.47 – 7.38 (m, 3H), 7.33 – 7.27 (m, 2H), 7.24 – 7.15 (m, 3H), 3.44 (d,  $J = 17.3$  Hz, 1H), 3.38 (d,  $J = 17.3$  Hz, 1H), 2.39 (s, 3H), 1.99 (s, 3H);  $^{13}\text{C}$  NMR (100 MHz,  $\text{CDCl}_3$ )  $\delta$  152.5, 143.7, 143.5, 136.4, 132.4, 131.9, 130.7, 130.4, 130.1, 129.2, 128.7, 128.0, 127.4, 126.6, 125.3, 70.8, 52.2, 25.1, 21.6; HRMS (ESI-TOF)  $m/z$ :  $[\text{M}+\text{H}]^+$  calcd for  $\text{C}_{23}\text{H}_{21}\text{Cl}_2\text{N}_2\text{O}_2\text{S}$  459.0695, found 459.0695.

**5-methyl-5-(naphthalen-2-yl)-3-phenyl-1-tosyl-4,5-dihydro-1H-pyrazole (2w)**

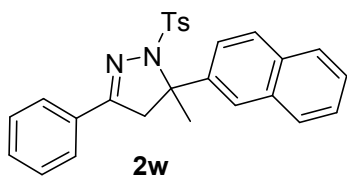

White solid (80.4 mg, 91%); mp 174–176 °C;  $^1\text{H}$  NMR (400 MHz,  $\text{CDCl}_3$ )  $\delta$  7.82 – 7.70 (m, 5H), 7.63 (d,  $J = 8.7$  Hz, 1H), 7.55 – 7.46 (m, 4H), 7.46 – 7.41 (m, 3H), 7.36 (dd,  $J = 8.7, 2.0$  Hz, 1H), 6.95 (d,  $J = 8.1$  Hz, 2H), 3.60 (d,  $J = 17.3$  Hz, 1H), 3.44 (d,

$J = 17.3$  Hz, 1H), 2.29 (s, 3H), 2.17 (s, 3H);  $^{13}\text{C}$  NMR (100 MHz,  $\text{CDCl}_3$ )  $\delta$  152.6, 143.0, 140.2, 136.7, 132.7, 132.6, 131.1, 130.1, 128.8, 128.6, 128.3, 128.0, 127.4, 127.3, 126.5, 126.2, 126.1, 124.6, 123.9, 71.8, 52.6, 25.4, 21.4; HRMS (ESI-TOF)  $m/z$ :  $[\text{M}+\text{H}]^+$  calcd for  $\text{C}_{27}\text{H}_{25}\text{N}_2\text{O}_2\text{S}$  441.1631, found 441.1630.

#### 5,5-dimethyl-3-phenyl-1-tosyl-4,5-dihydro-1H-pyrazole (2x)

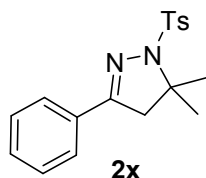

White solid (39.1 mg, 60%); mp 53-55 °C;  $^1\text{H}$  NMR (400 MHz,  $\text{CDCl}_3$ )  $\delta$  7.93 (d,  $J = 8.3$  Hz, 2H), 7.68 – 7.61 (m, 2H), 7.43 – 7.34 (m, 3H), 7.27 (d,  $J = 10.3$  Hz, 2H), 3.04 (s, 2H), 2.40 (s, 3H), 1.56 (s, 6H);  $^{13}\text{C}$  NMR (100 MHz,  $\text{CDCl}_3$ )  $\delta$  153.4, 143.4, 137.3, 131.4, 130.0, 129.2, 128.5, 128.1, 126.4, 69.1, 49.2, 27.1, 21.5; HRMS (ESI-TOF)  $m/z$ :  $[\text{M}+\text{H}]^+$  calcd for  $\text{C}_{18}\text{H}_{21}\text{N}_2\text{O}_2\text{S}$  329.1318, found 329.1315.

#### 5-cyclohexyl-5-methyl-3-phenyl-1-tosyl-4,5-dihydro-1H-pyrazole (2y)

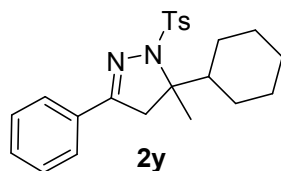

White solid (55.4 mg, 72%); mp 57–58 °C;  $^1\text{H}$  NMR (400 MHz,  $\text{CDCl}_3$ )  $\delta$  7.92 (d,  $J = 8.3$  Hz, 2H), 7.70 – 7.62 (m, 2H), 7.44 – 7.33 (m, 3H), 7.28 (d,  $J = 8.2$  Hz, 2H), 3.22 (d,  $J = 17.0$  Hz, 1H), 2.66 (d,  $J = 17.0$  Hz, 1H), 2.39 (s, 3H), 2.36 – 2.18 (m, 1H), 1.92 – 1.77 (m, 3H), 1.77 – 1.66 (m, 2H), 1.42 (s, 3H), 1.26 – 1.30 (m, 1H), 1.30 – 1.24 (m, 1H), 1.15 – 1.04 (m, 1H), 0.94 – 0.82 (m, 2H);  $^{13}\text{C}$  NMR (100 MHz,  $\text{CDCl}_3$ )  $\delta$  152.7, 143.2, 137.6, 131.4, 129.8, 129.2, 128.4, 127.8, 126.3, 75.9, 45.2, 42.4, 28.4, 27.6, 26.3, 26.3, 25.8, 24.3, 21.5; HRMS (ESI-TOF)  $m/z$ :  $[\text{M}+\text{H}]^+$  calcd for  $\text{C}_{23}\text{H}_{29}\text{N}_2\text{O}_2\text{S}$  397.1944, found 397.1943.

#### 5-methyl-1,3,5-triphenyl-4,5-dihydro-1H-pyrazole (2ab)

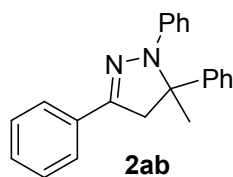

Yellow solid (39.5 mg, 63%); mp 166–167 °C;  $^1\text{H}$  NMR (400 MHz,  $\text{CDCl}_3$ )  $\delta$  7.76 – 7.69 (m, 2H), 7.57 – 7.49 (m, 2H), 7.43 – 7.37 (m, 4H), 7.36 – 7.29 (m, 2H), 7.14 – 7.09 (m, 2H), 7.06 – 6.99 (m, 2H), 6.82 – 6.74 (m, 1H), 3.44 (d,  $J = 16.8$  Hz, 1H), 3.43 (d,  $J = 16.8$  Hz, 1H), 1.82 (s, 3H);  $^{13}\text{C}$  NMR (100 MHz,  $\text{CDCl}_3$ )  $\delta$  145.9, 145.2, 143.6, 133.0, 129.0, 128.6, 128.5, 128.4, 127.2, 125.6, 125.5, 119.4, 115.3, 69.9, 53.5, 22.2; HRMS (ESI-TOF)  $m/z$ :  $[\text{M}+\text{H}]^+$  calcd for  $\text{C}_{22}\text{H}_{20}\text{N}_2$  312.1626, found 312.1628.

**5-methyl-3,5-diphenyl-1-(2,4,6-trichlorophenyl)-4,5-dihydro-1H-pyrazole (2ac)**

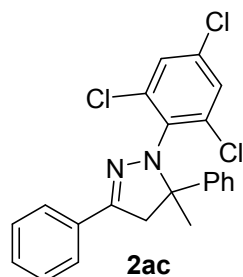

Yellow solid (76.8 mg, 92%); mp 127–128 °C;  $^1\text{H}$  NMR (400 MHz,  $\text{CDCl}_3$ )  $\delta$  7.75 – 7.67 (m, 2H), 7.48 – 7.43 (m, 2H), 7.42 – 7.35 (m, 3H), 7.33 – 7.21 (m, 5H), 3.63 (d,  $J = 16.7$  Hz, 1H), 3.49 (d,  $J = 16.7$  Hz, 1H), 1.77 (s, 3H);  $^{13}\text{C}$  NMR (100 MHz,  $\text{CDCl}_3$ )  $\delta$  150.5, 145.4, 138.2, 137.0, 132.8, 132.3, 128.8, 128.6, 128.0, 127.1, 125.92, 125.85, 70.9, 51.4, 24.0; HRMS (ESI-TOF)  $m/z$ :  $[\text{M}+\text{H}]^+$  calcd for  $\text{C}_{22}\text{H}_{18}\text{Cl}_3\text{N}_2$  415.0530, found 415.0533.

**1-(5-methyl-3,5-diphenyl-4,5-dihydro-1H-pyrazol-1-yl)ethan-1-one (2ad)**

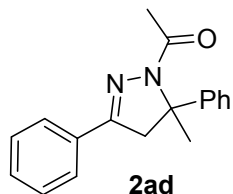

White solid (34.1 mg, 61%); mp 146–147 °C;  $^1\text{H}$  NMR (400 MHz,  $\text{CDCl}_3$ )  $\delta$  7.74 – 7.68 (m, 2H), 7.46 – 7.39 (m, 3H), 7.37 – 7.28 (m, 4H), 7.28 – 7.21 (m, 1H), 3.46 (d,  $J = 17.6$  Hz, 1H), 3.40 (d,  $J = 17.6$  Hz, 1H), 2.42 (s, 3H), 2.07 (s, 3H);  $^{13}\text{C}$  NMR (100

MHz, CDCl<sub>3</sub>)  $\delta$  168.8, 151.5, 144.9, 131.5, 130.1, 128.7, 128.6, 127.0, 126.4, 124.4, 67.5, 52.3, 24.5, 23.2; HRMS (ESI-TOF)  $m/z$ : [M+H]<sup>+</sup> calcd for C<sub>18</sub>H<sub>19</sub>N<sub>2</sub>O 279.1492, found 279.1492.

**(5-methyl-3,5-diphenyl-4,5-dihydro-1*H*-pyrazol-1-yl)(phenyl)methanone (2ae)**

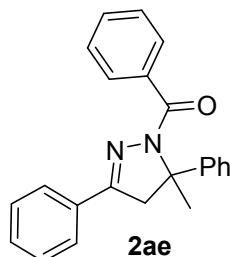

White solid (49.0 mg, 70%); mp 100–101 °C; <sup>1</sup>H NMR (400 MHz, CDCl<sub>3</sub>)  $\delta$  7.97 – 7.89 (m, 2H), 7.68 – 7.62 (m, 2H), 7.50 – 7.43 (m, 2H), 7.43 – 7.36 (m, 6H), 7.36 – 7.31 (m, 2H), 7.28 – 7.22 (m, 1H), 3.50 (d,  $J$  = 17.6 Hz, 1H), 3.43 (d,  $J$  = 17.6 Hz, 1H), 2.19 (s, 3H); <sup>13</sup>C NMR (100 MHz, CDCl<sub>3</sub>)  $\delta$  166.3, 152.3, 144.7, 135.5, 131.5, 130.6, 130.2, 130.0, 128.69, 128.65, 127.5, 127.1, 126.6, 124.4, 68.8, 51.7, 24.4; HRMS (ESI-TOF)  $m/z$ : [M+H]<sup>+</sup> calcd for C<sub>23</sub>H<sub>21</sub>N<sub>2</sub>O 341.1648, found 341.1646.

***N'*-((1*E*,2*Z*)-1,3-diphenylbut-2-en-1-ylidene)-4-methylbenzenesulfonohydrazide (Z-3)**

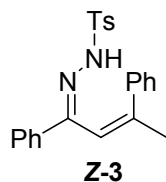

White solid (228.6 mg, 29%); mp 157–159 °C; <sup>1</sup>H NMR (400 MHz, CDCl<sub>3</sub>)  $\delta$  7.86 (s, 1H), 7.68 – 7.62 (m, 2H), 7.58 (d,  $J$  = 8.2 Hz, 2H), 7.32 – 7.24 (m, 3H), 7.21 (d,  $J$  = 8.2 Hz, 2H), 7.14 – 7.07 (m, 1H), 7.00 (d,  $J$  = 4.3 Hz, 4H), 5.92 (s, 1H), 2.41 (s, 3H), 2.33 (s, 3H); <sup>13</sup>C NMR (100 MHz, CDCl<sub>3</sub>)  $\delta$  151.1, 147.1, 143.6, 138.8, 135.9, 135.4, 129.5, 129.3, 128.7, 128.4, 128.2, 127.7, 126.9, 126.2, 116.7, 24.8, 21.6; HRMS (ESI-TOF)  $m/z$ : [M +H]<sup>+</sup> calcd for C<sub>23</sub>H<sub>23</sub>N<sub>2</sub>O<sub>2</sub>S 391.1475, found 391.1475.



***N'*-((1*E*,2*E*)-1,3-diphenylbut-2-en-1-ylidene)-4-methylbenzenesulfonohydrazide<sup>5</sup>  
(**E-3**)**

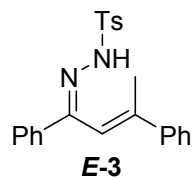

White solid (443.2 mg, 57%); mp 99–101 °C; <sup>1</sup>H NMR (400 MHz, CDCl<sub>3</sub>) δ 8.00 (s, 1H), 7.92 (d, *J* = 7.9 Hz, 2H), 7.72 – 7.66 (m, 2H), 7.56 (d, *J* = 7.8 Hz, 2H), 7.45 – 7.38 (m, 3H), 7.38 – 7.30 (m, 5H), 6.23 (s, 1H), 2.42 (s, 3H), 1.88 (s, 3H); <sup>13</sup>C NMR (100 MHz, CDCl<sub>3</sub>) δ 151.8, 146.2, 144.0, 139.6, 135.7, 135.6, 129.8, 129.5, 128.7, 128.6, 128.4, 127.9, 126.8, 125.8, 115.8, 21.5, 18.1; HRMS (ESI-TOF) *m/z*: [M + H]<sup>+</sup> calcd for C<sub>23</sub>H<sub>23</sub>N<sub>2</sub>O<sub>2</sub>S 391.1475, found 391.1478.

**X-ray structure of 2e (CCDC 2018227)**

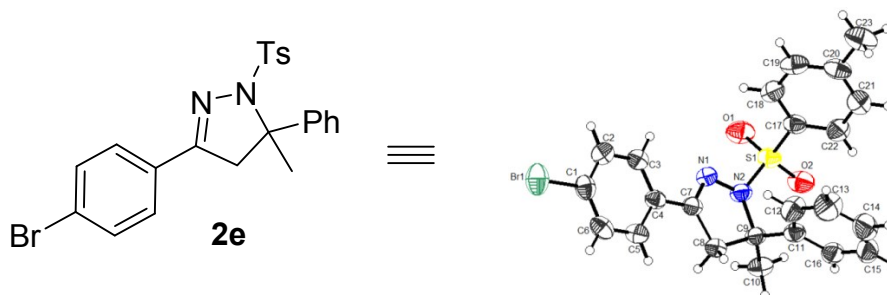

**Crystal data and structure refinement for 2e**

|                     |                                                                   |
|---------------------|-------------------------------------------------------------------|
| Identification code | <b>2e</b>                                                         |
| Empirical formula   | C <sub>23</sub> H <sub>21</sub> BrN <sub>2</sub> O <sub>2</sub> S |
| Formula weight      | 469.39                                                            |
| Temperature         | 296(2) K                                                          |
| Wavelength          | 0.71073 Å                                                         |
| Crystal system      | Monoclinic                                                        |

|                                   |                                             |                   |
|-----------------------------------|---------------------------------------------|-------------------|
| Space group                       | P2 <sub>1</sub> /n                          |                   |
| Unit cell dimensions              | a = 12.3545(4) Å                            | α = 90°.          |
|                                   | b = 11.9990(4) Å                            | β = 94.0510(10)°. |
|                                   | c = 14.3274(6) Å                            | γ = 90°.          |
| Volume                            | 2118.61(13) Å <sup>3</sup>                  |                   |
| Z                                 | 4                                           |                   |
| Density (calculated)              | 1.472 Mg/m <sup>3</sup>                     |                   |
| Absorption coefficient            | 2.061 mm <sup>-1</sup>                      |                   |
| F(000)                            | 960                                         |                   |
| Crystal size                      | 0.320 x 0.250 x 0.220 mm <sup>3</sup>       |                   |
| Theta range for data collection   | 2.104 to 27.567°.                           |                   |
| Index ranges                      | -13<=h<=16, -14<=k<=15, -18<=l<=18          |                   |
| Reflections collected             | 32627                                       |                   |
| Independent reflections           | 4888 [R(int) = 0.0397]                      |                   |
| Completeness to theta = 25.242°   | 99.8 %                                      |                   |
| Absorption correction             | Semi-empirical from equivalents             |                   |
| Max. and min. transmission        | 0.7456 and 0.4795                           |                   |
| Refinement method                 | Full-matrix least-squares on F <sup>2</sup> |                   |
| Data / restraints / parameters    | 4888 / 0 / 264                              |                   |
| Goodness-of-fit on F <sup>2</sup> | 1.016                                       |                   |
| Final R indices [I>2sigma(I)]     | R1 = 0.0430, wR2 = 0.1048                   |                   |
| R indices (all data)              | R1 = 0.0672, wR2 = 0.1167                   |                   |
| Extinction coefficient            | n/a                                         |                   |
| Largest diff. peak and hole       | 0.675 and -0.744 e.Å <sup>-3</sup>          |                   |

## References

- (1) Tripathi, C. B.; Mukherjee, S. *Org. Lett.* **2014**, *16*, 3368.
- (2) Imai, T.; Nishida, S. *Synthesis* **1993**, *1993*, 395.
- (3) Rajam, S.; Jadhav, A. V.; Li, Q.; Sarkar, S. K.; Singh, P. N. D.; Rohr, A.; Pace, T.

- C. S.; Li, R.; Krause, J. A.; Bohne, C.; Ault, B. S.; Gudmundsdottir, A. D. *J. Org. Chem.* **2014**, *79*, 9325.
- (4) Hu, X.-Q.; Qi, X.; Chen, J.-R.; Zhao, Q.-Q.; Wei, Q.; Lan, Y.; Xiao, W.-J. *Nat. Chem.* **2016**, *7*, 11188.
- (5) Liu, W.; Wang, H.; Zhao, H; Li, B.; Chen, S. *Synlett* **2015**, *26*, 2170.

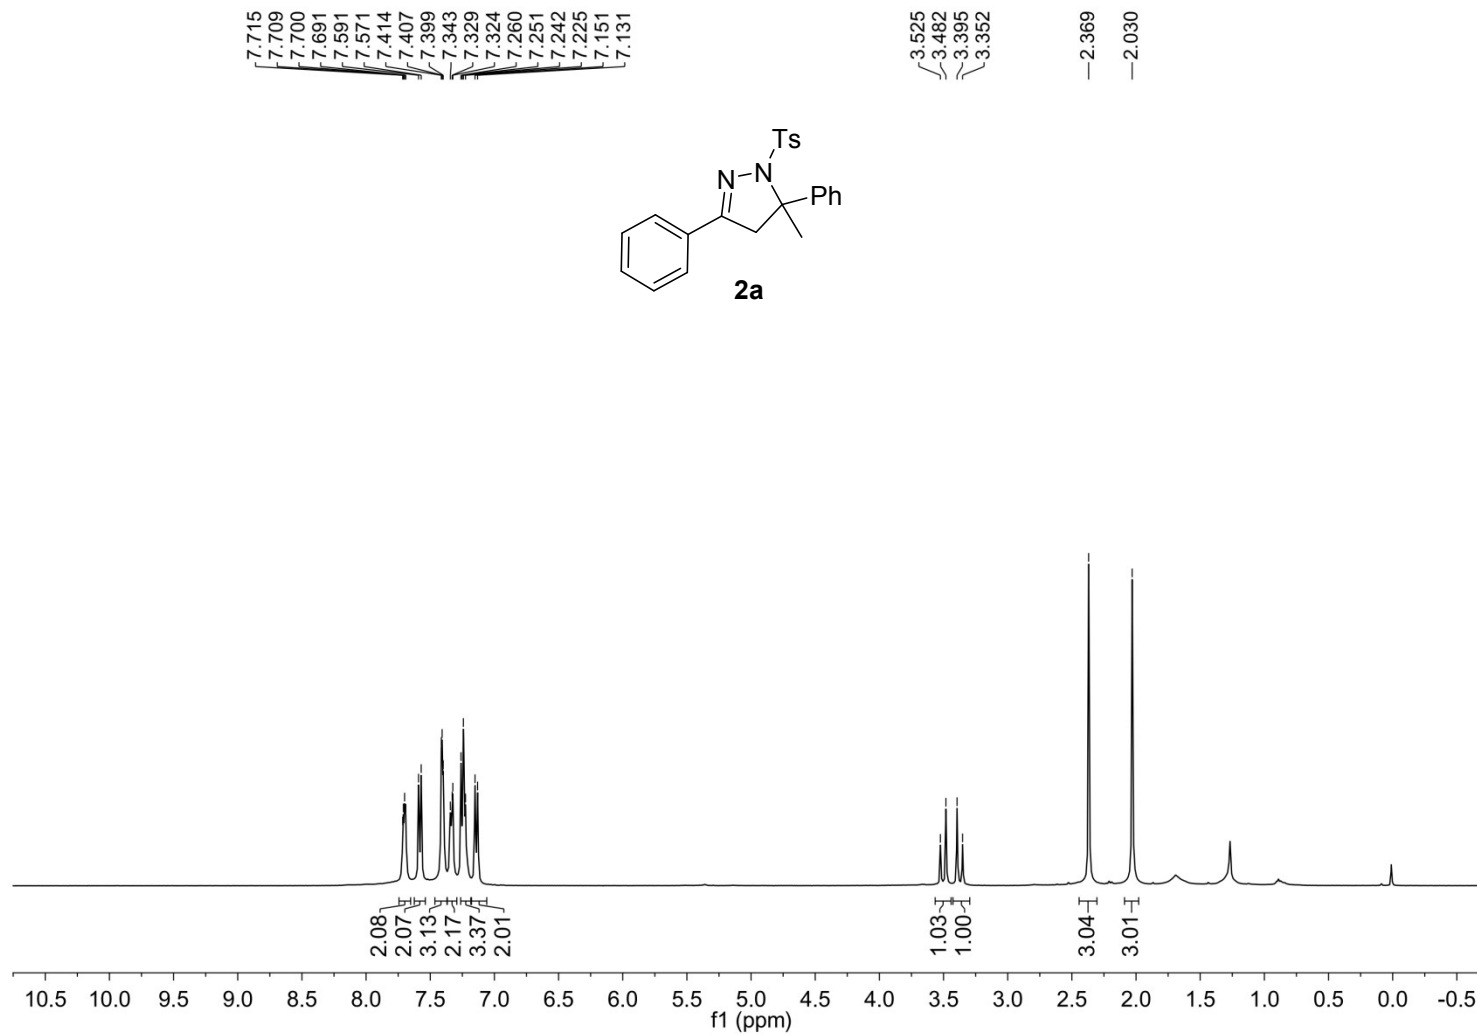

S20

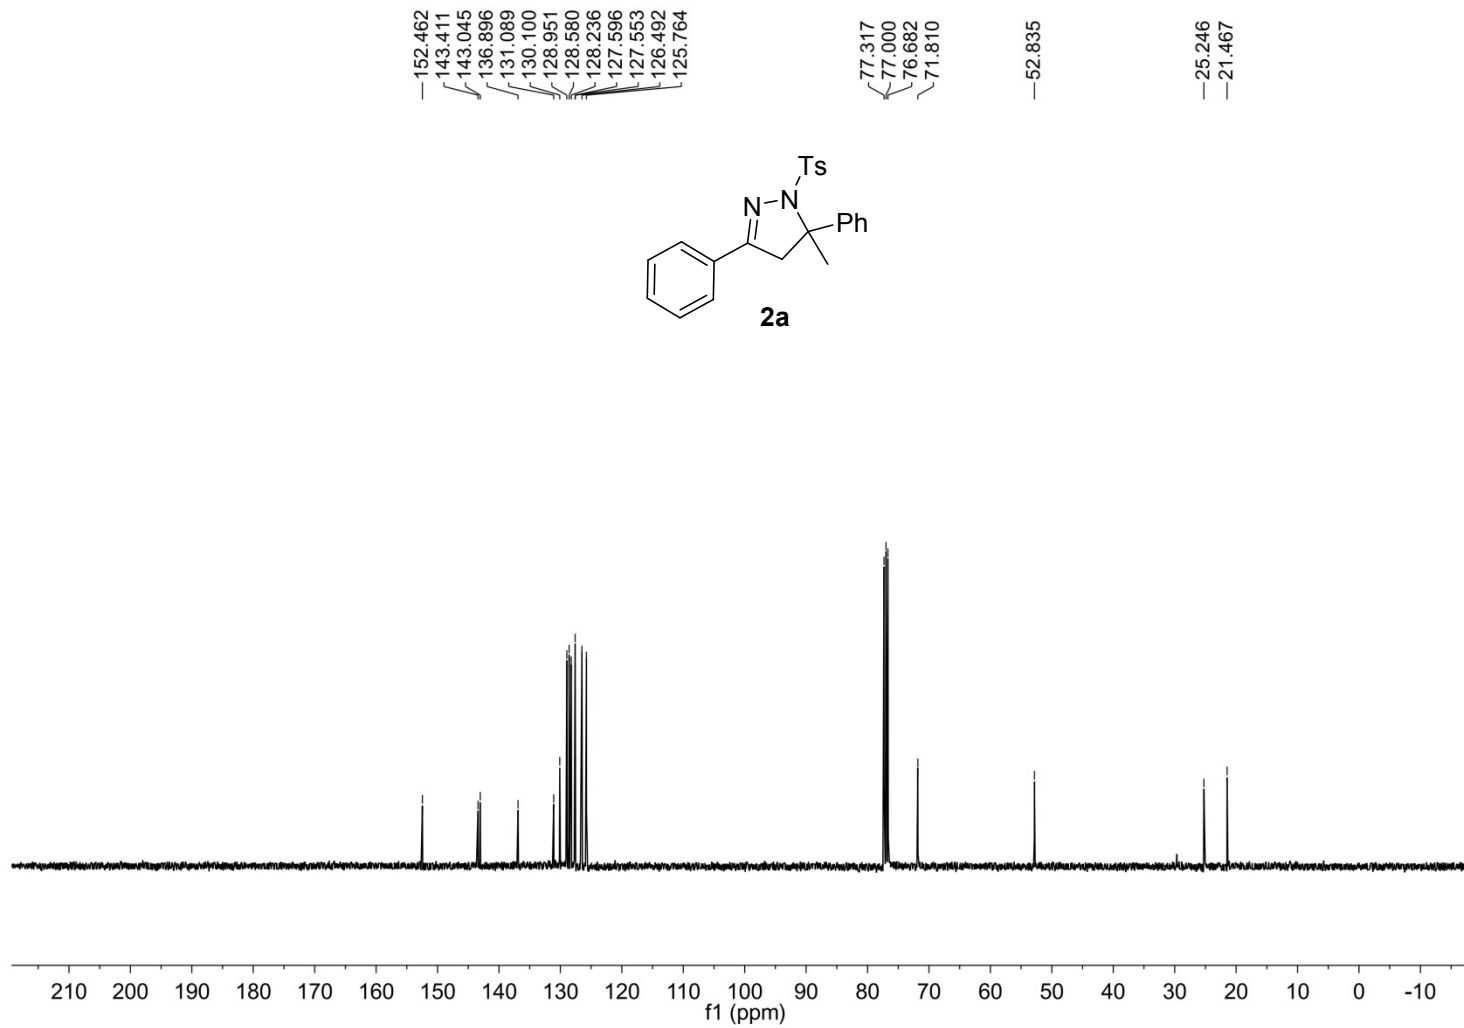

S21

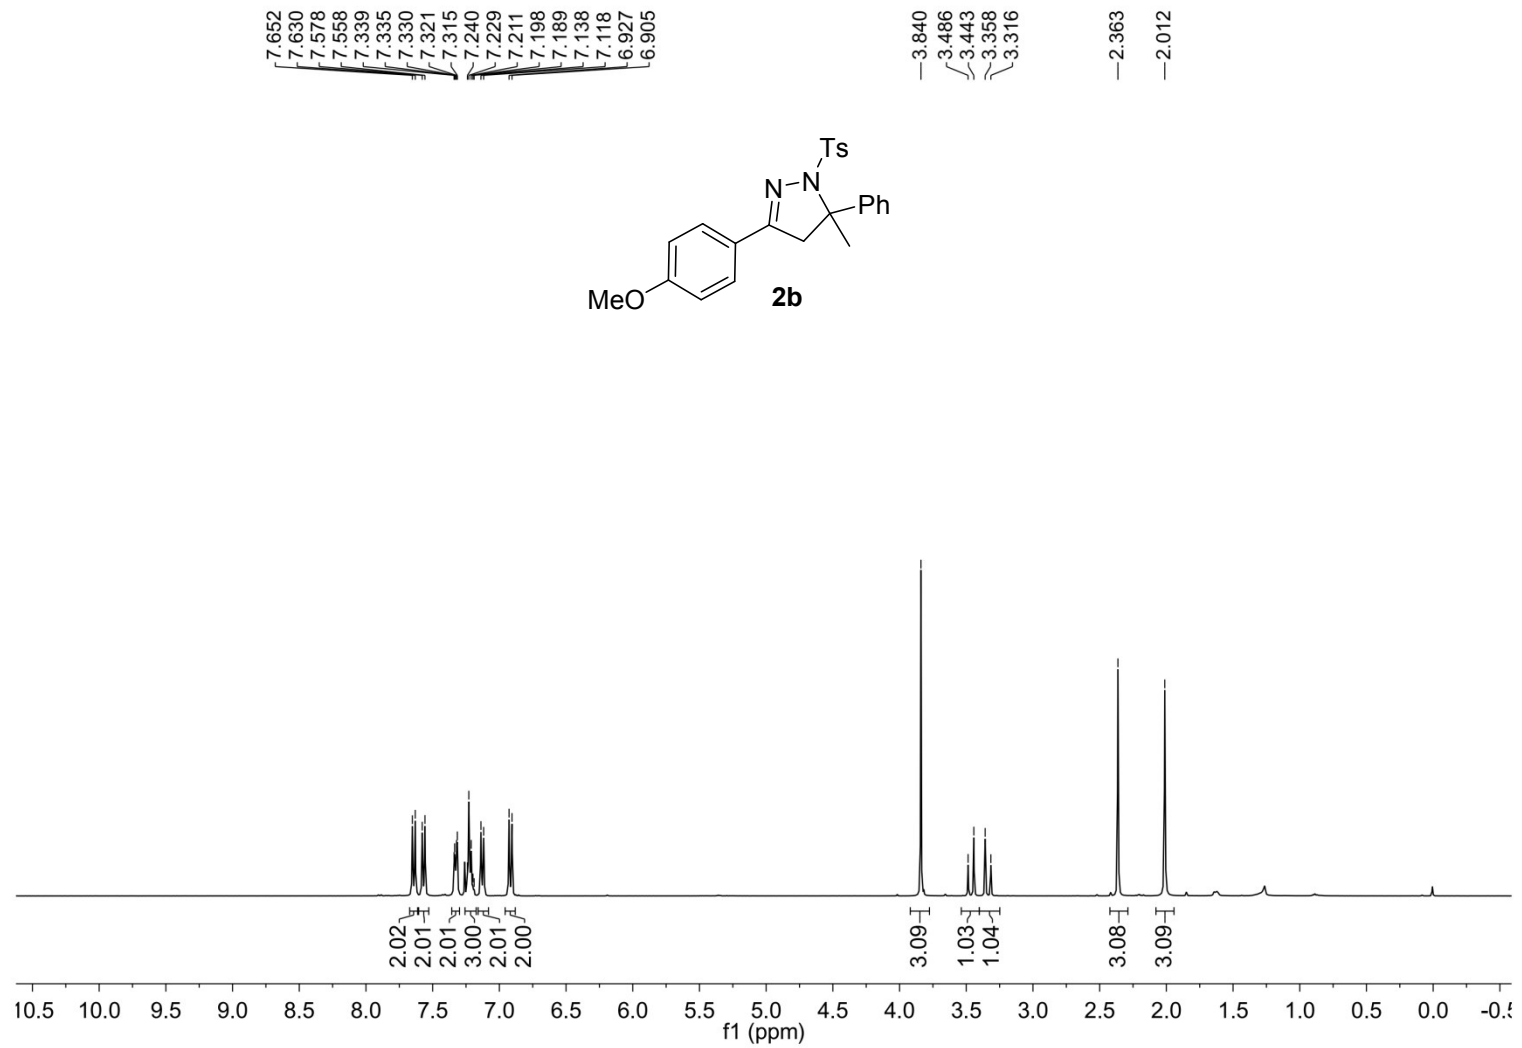

S22

— 161.128  
— 152.338  
143.465  
142.905  
136.929  
128.888  
128.194  
128.094  
127.593  
127.489  
125.785  
123.750  
113.973  
  
77.317  
77.000  
76.682  
71.555  
  
55.351  
52.961  
  
25.225  
21.472

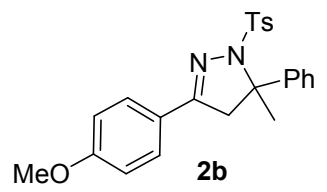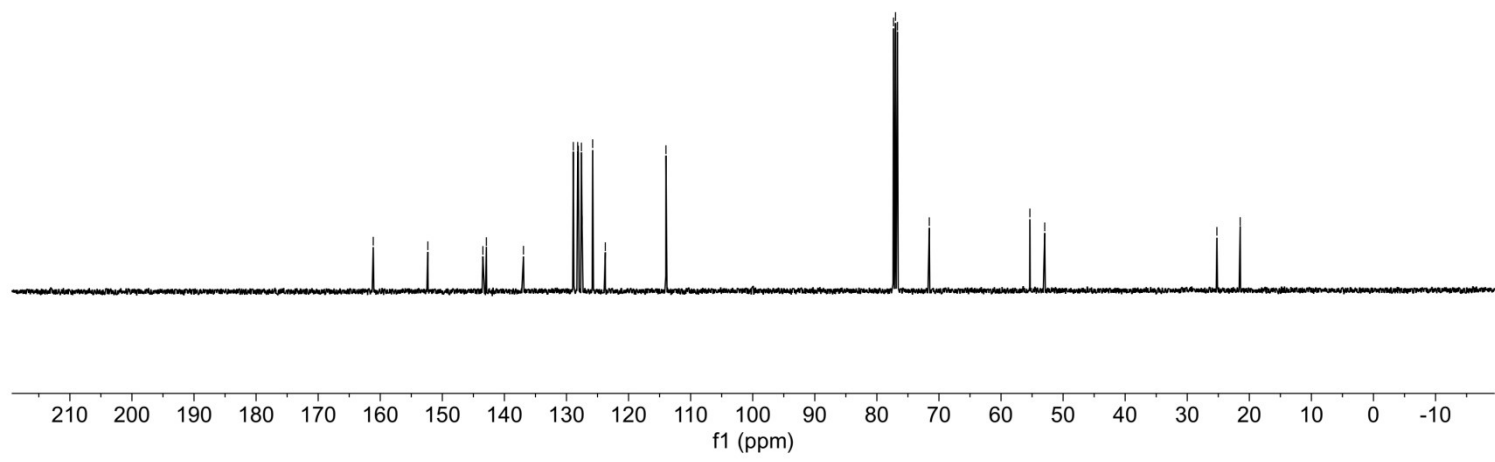

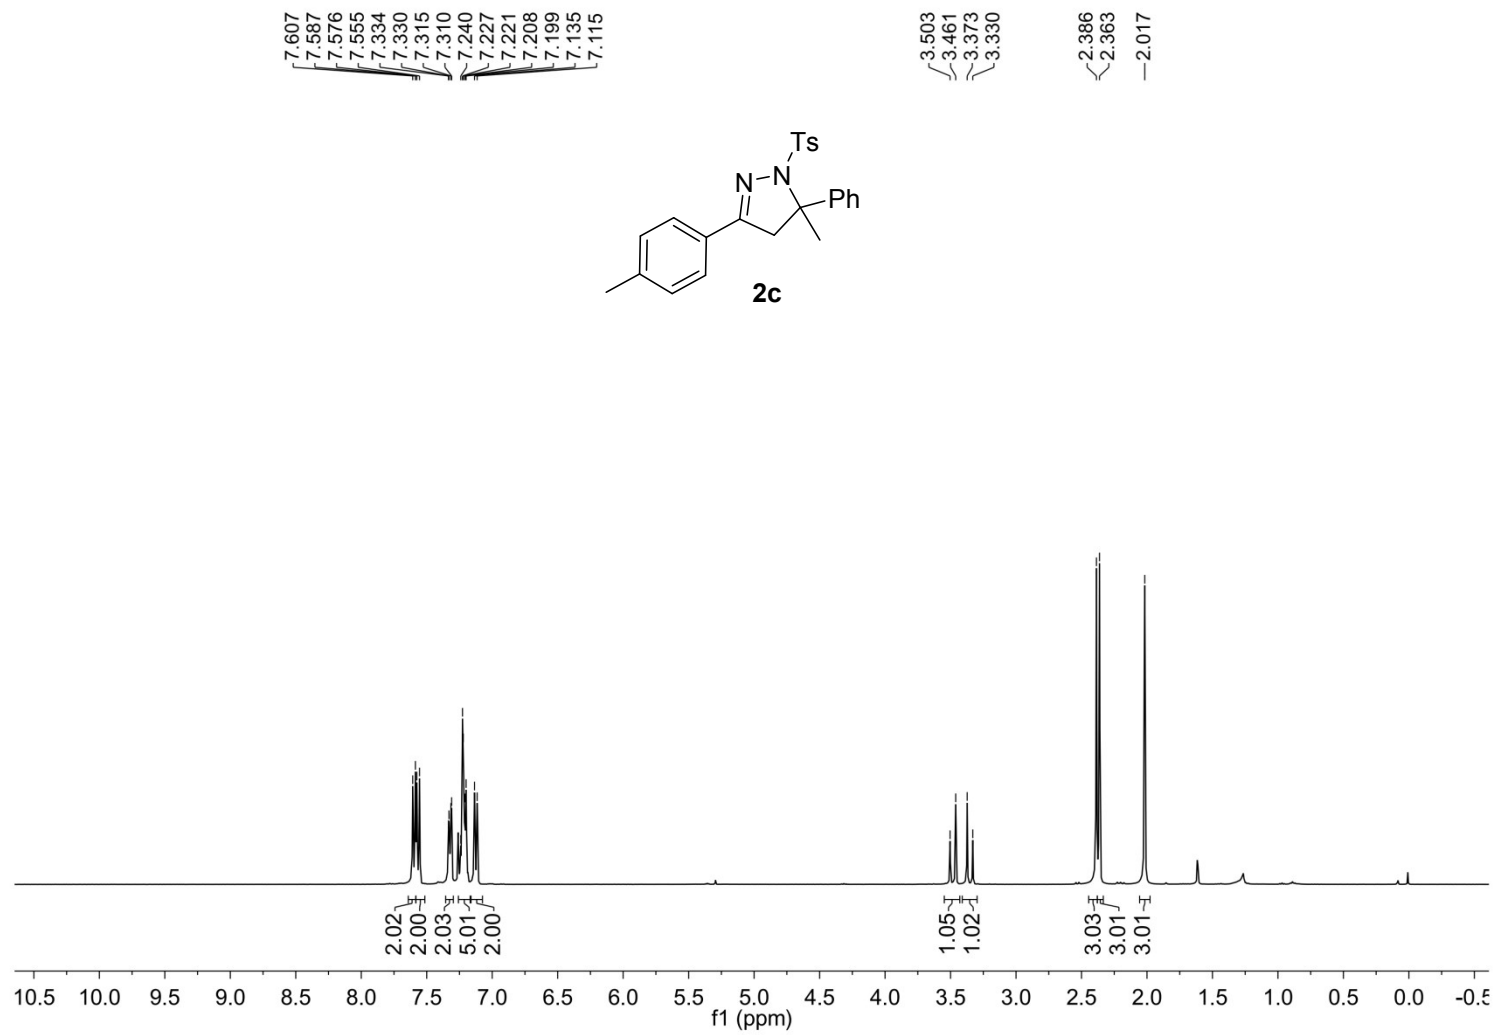



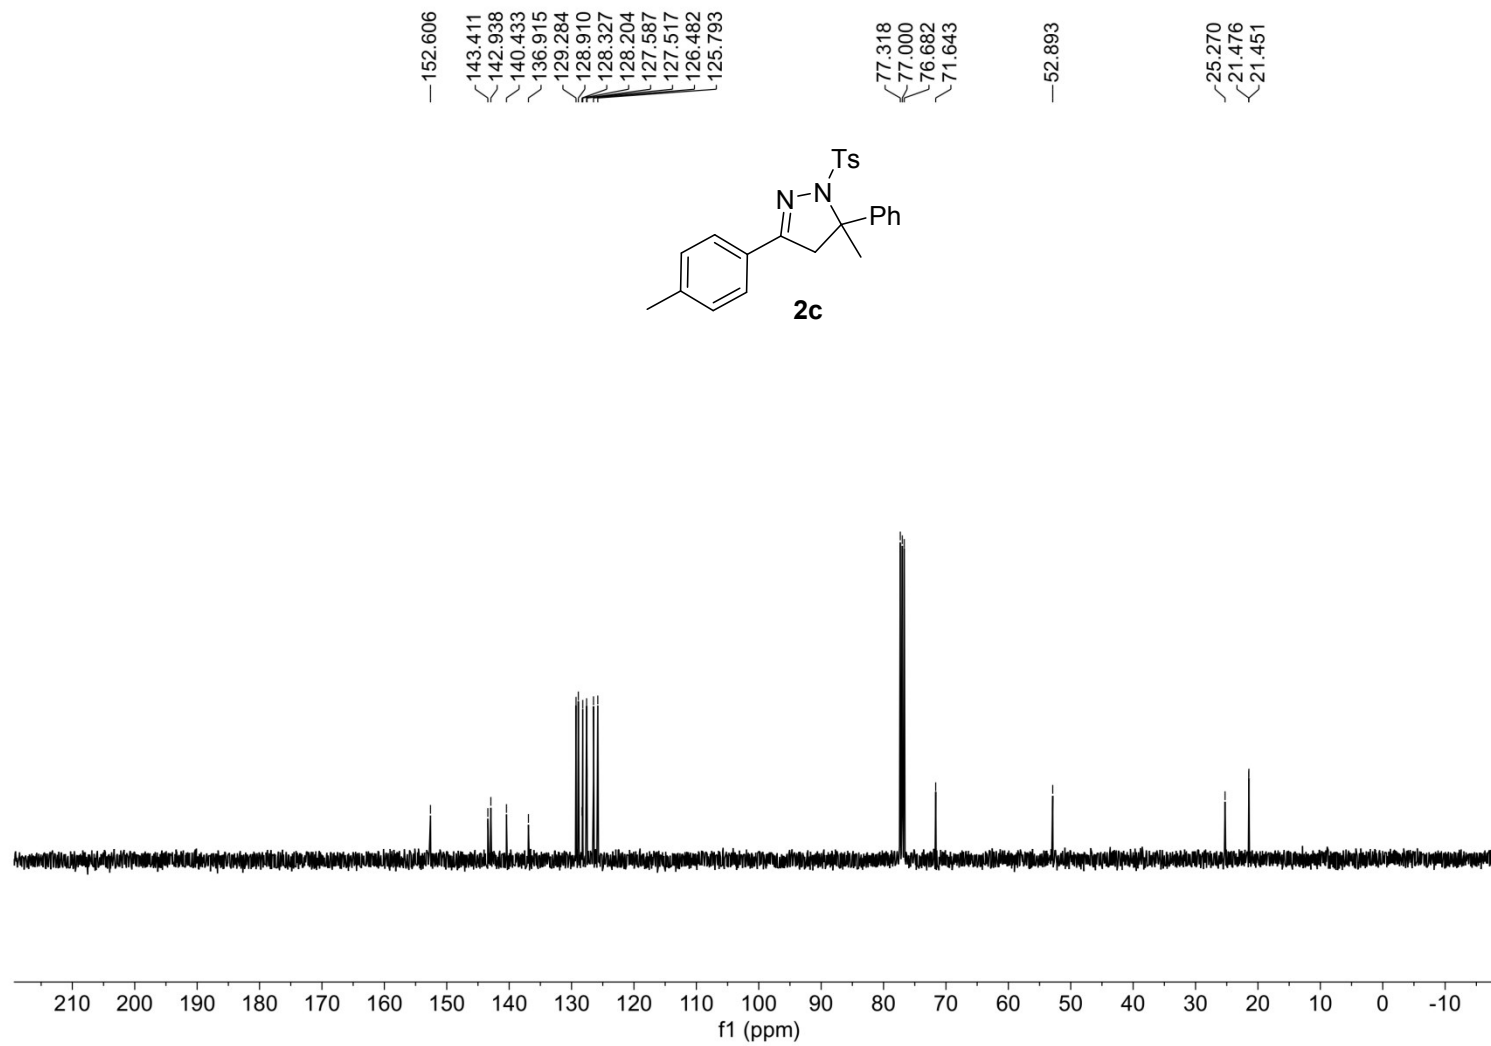

S25

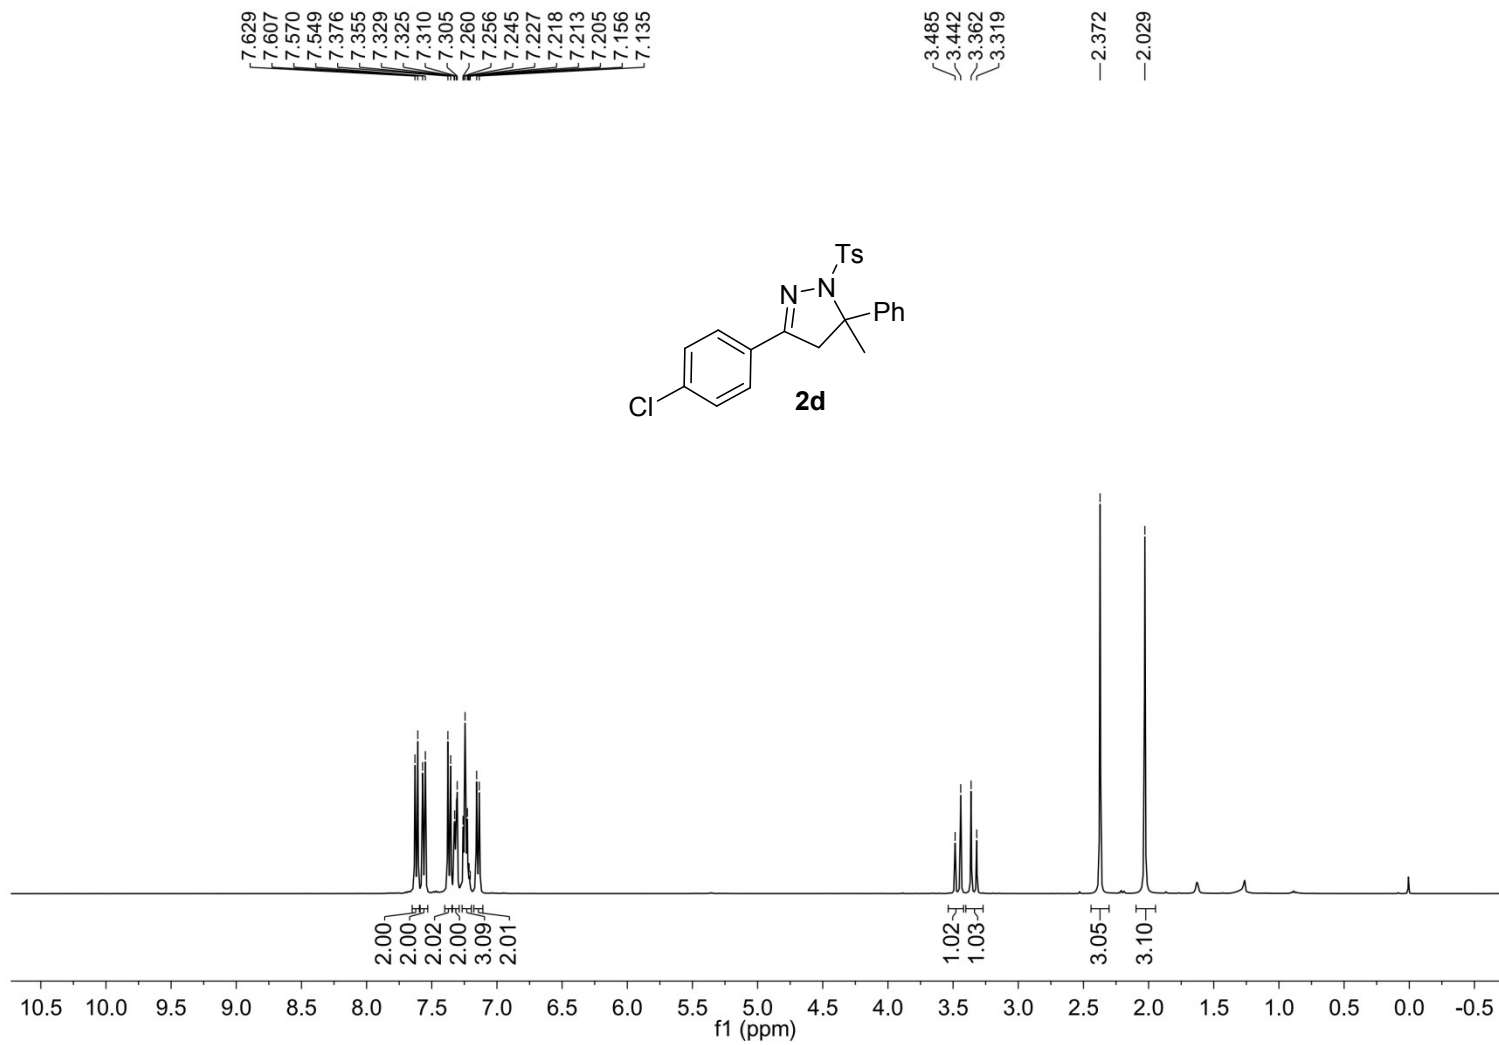

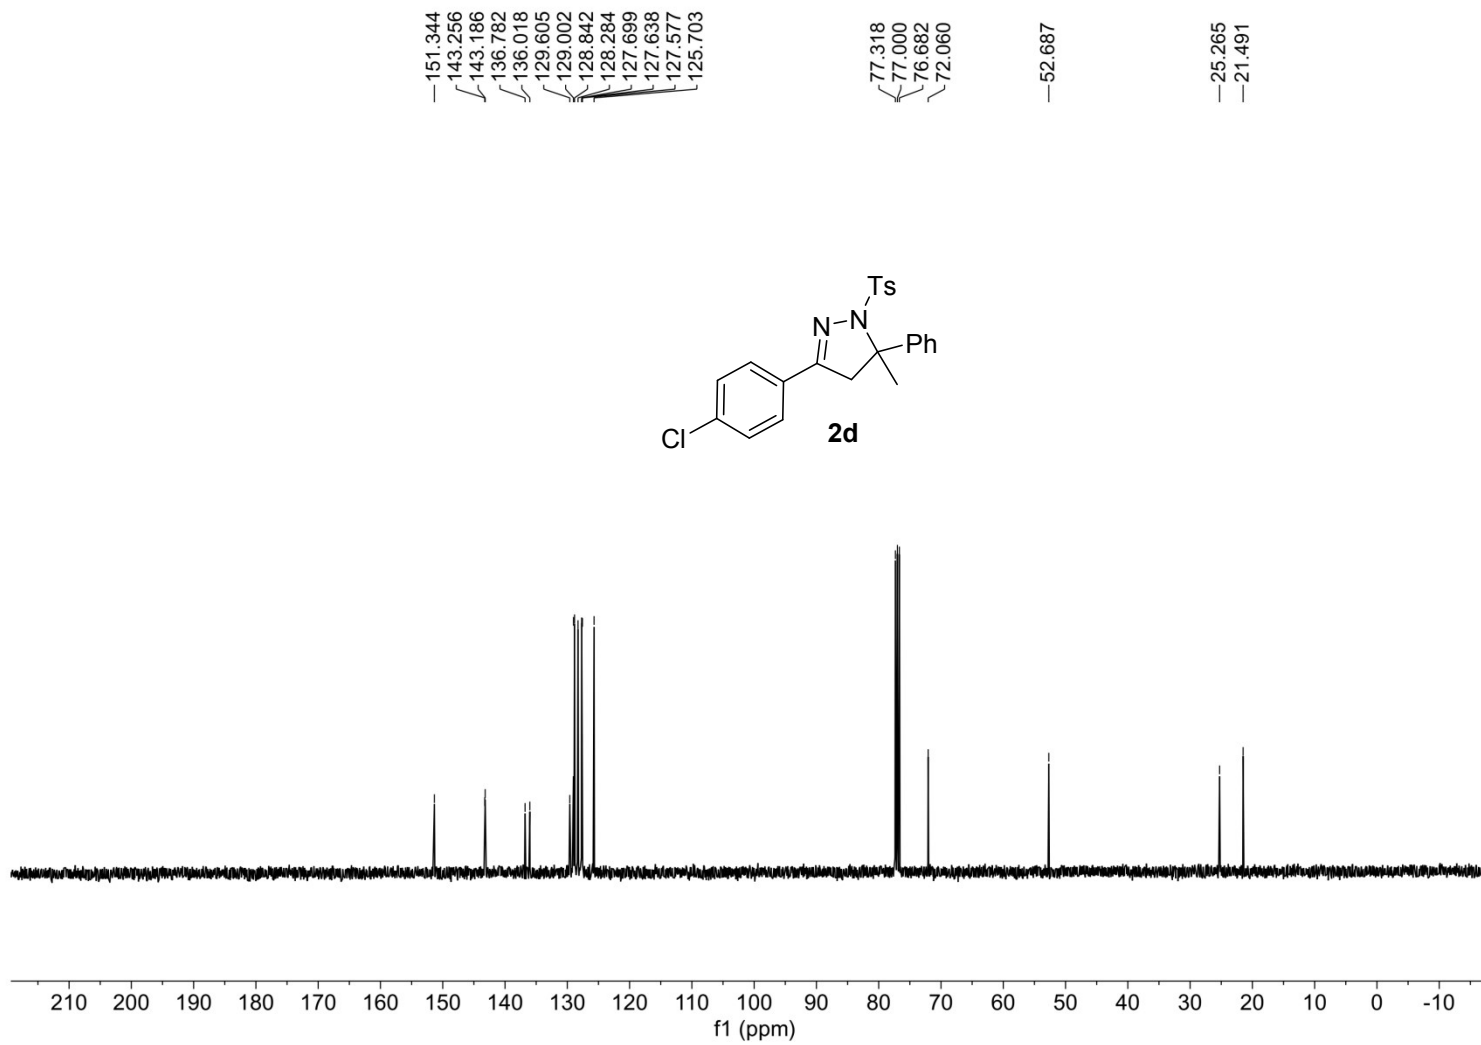

S27

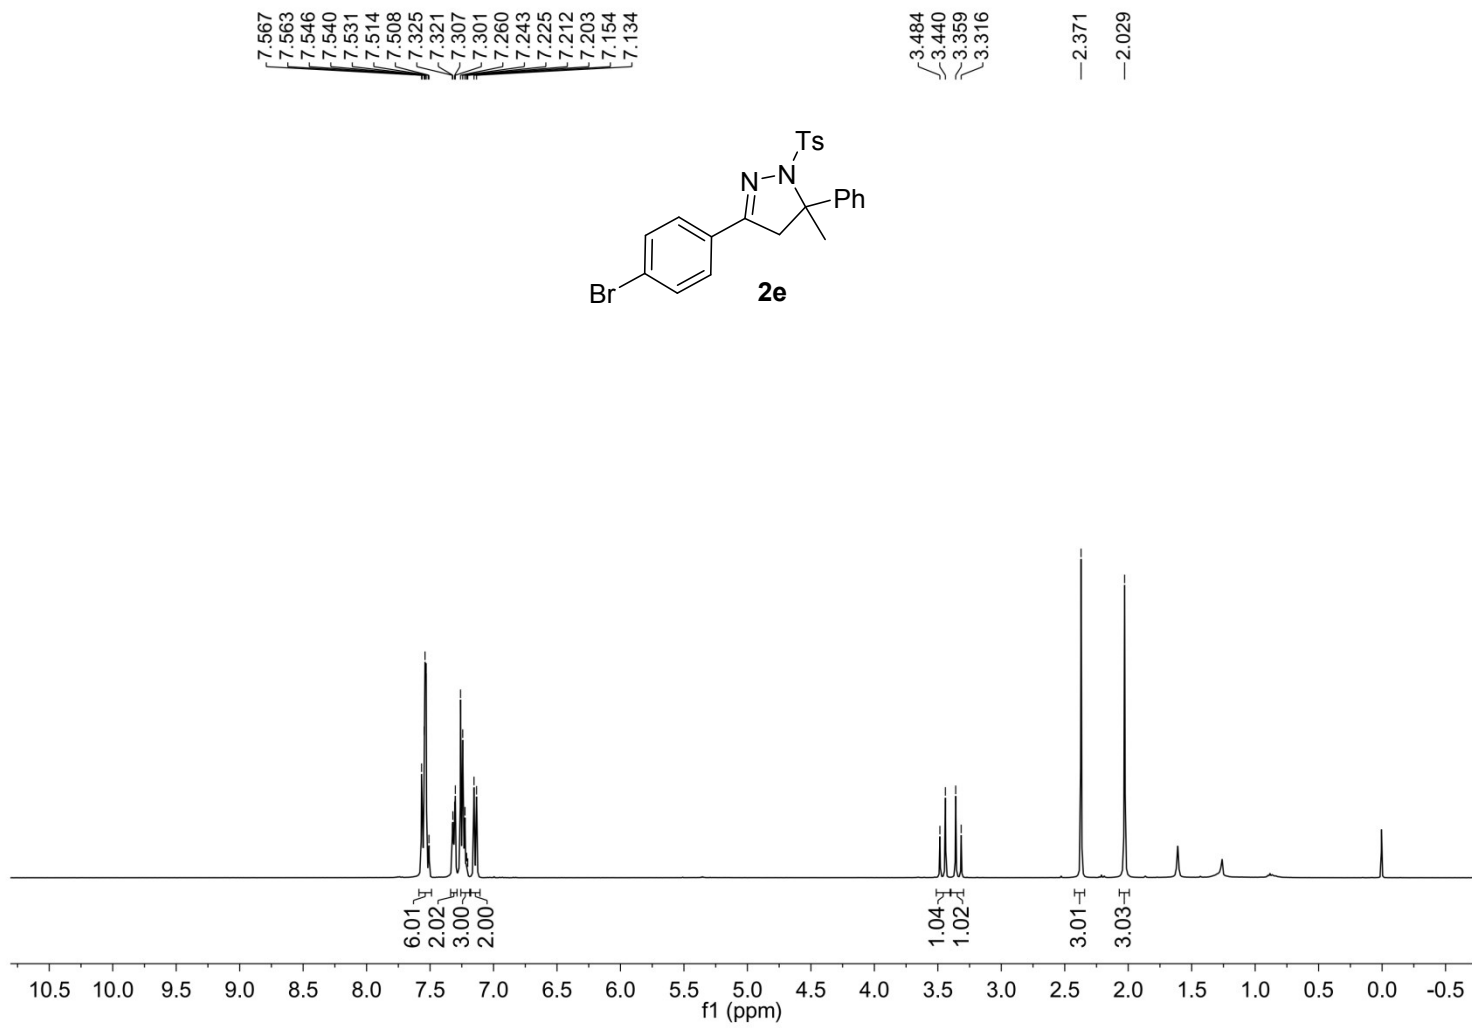

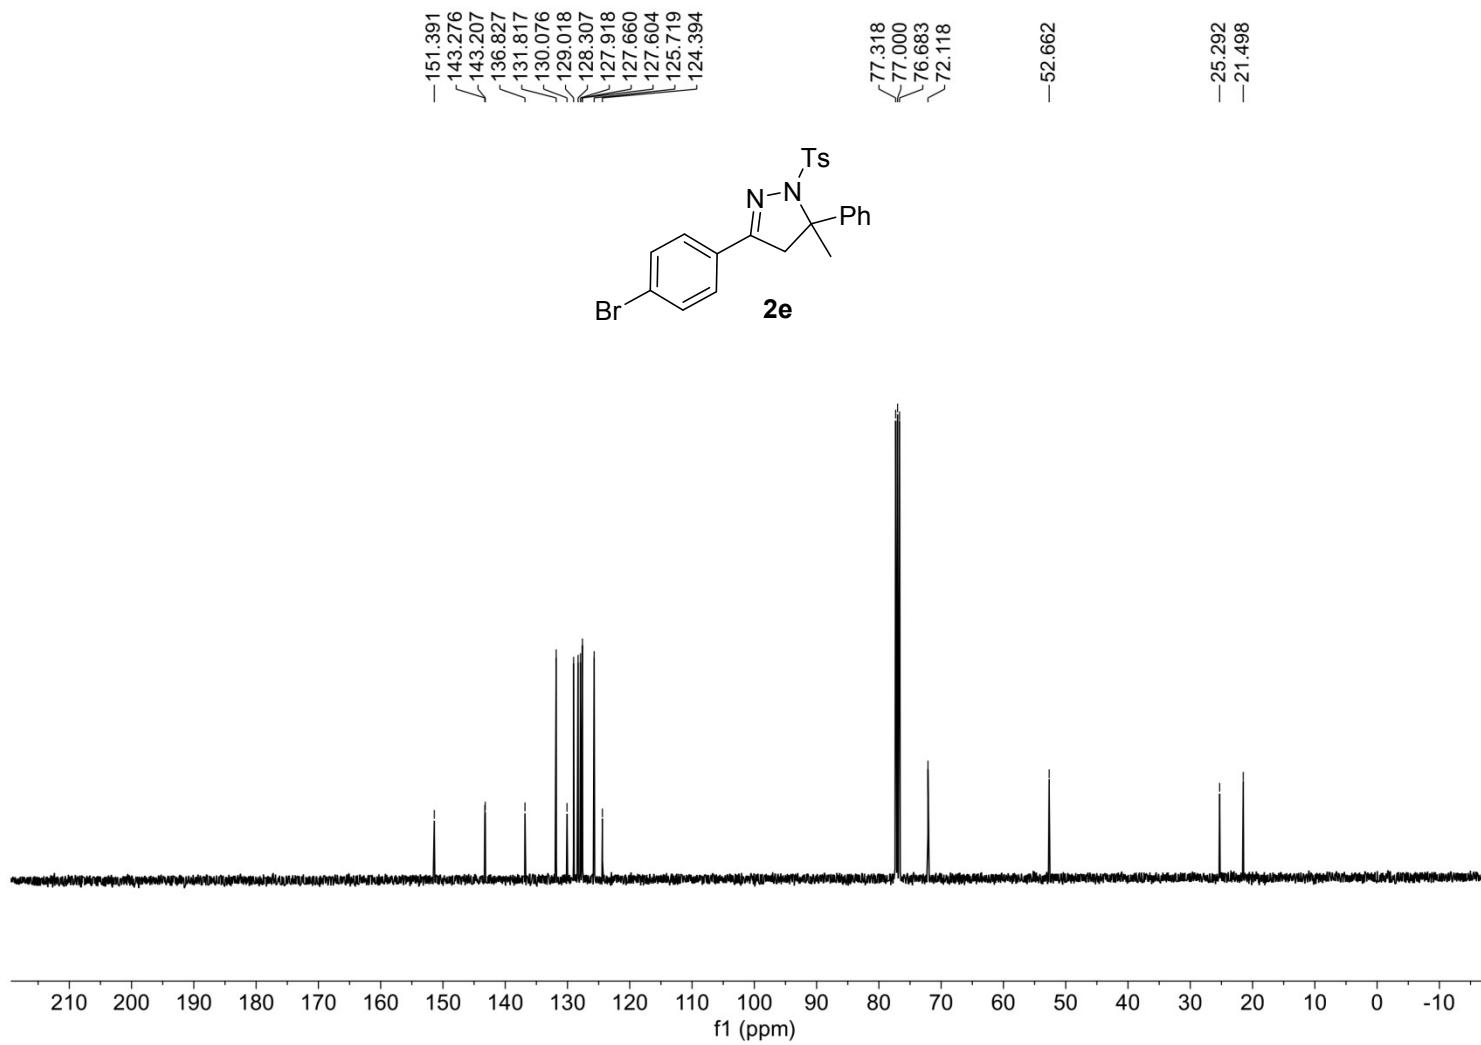

S29

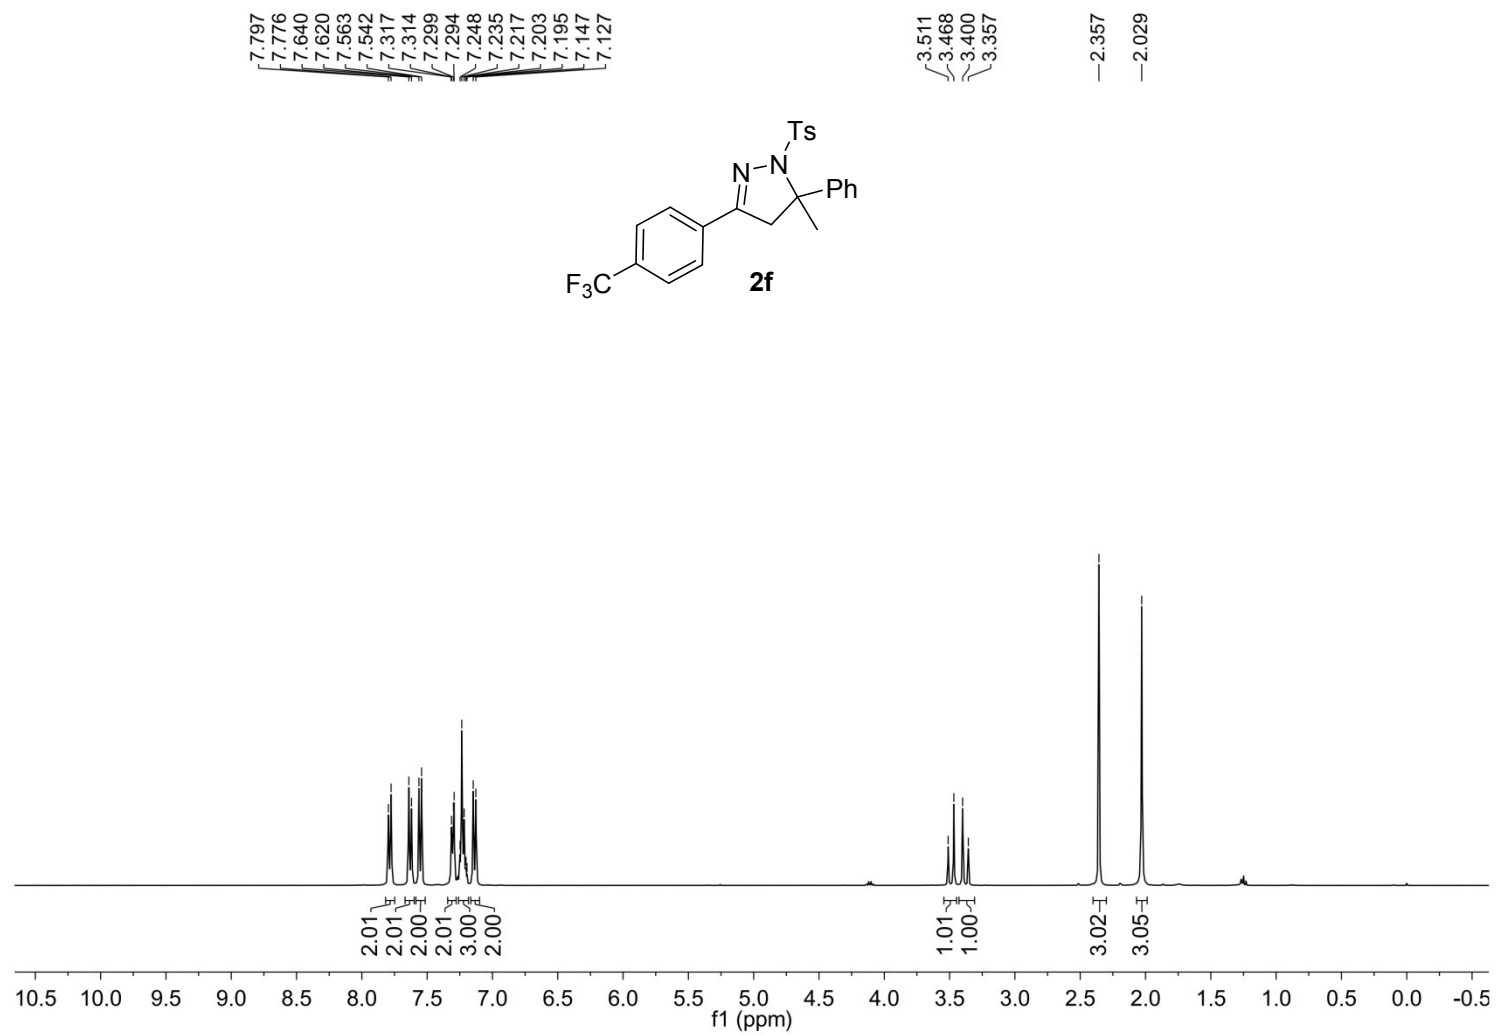

S30

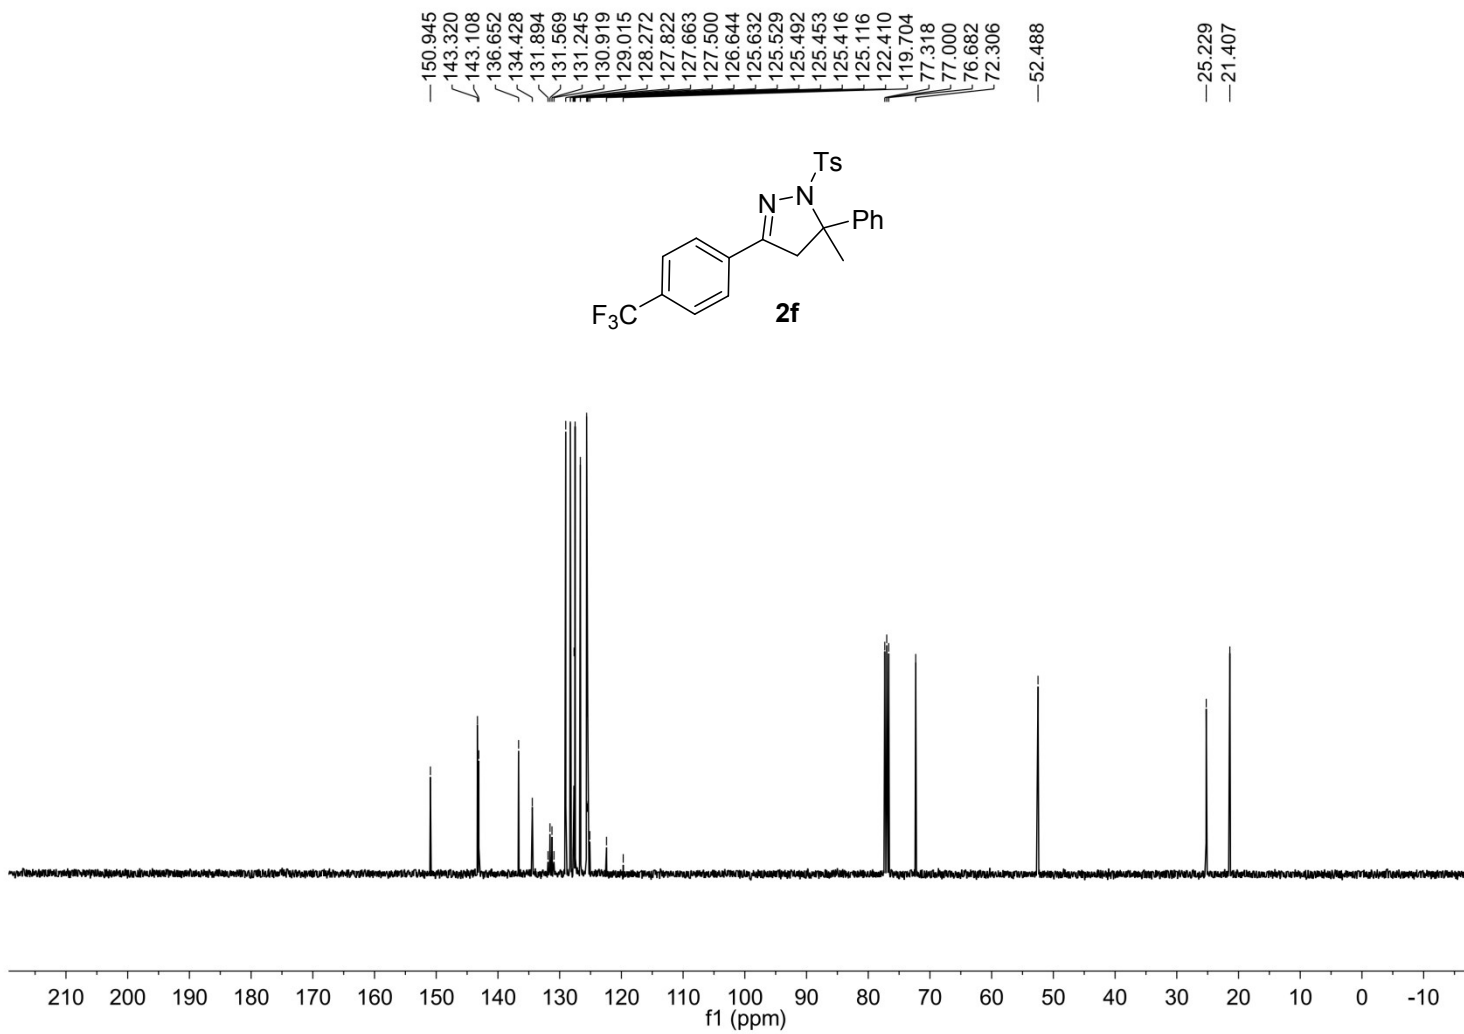

S31

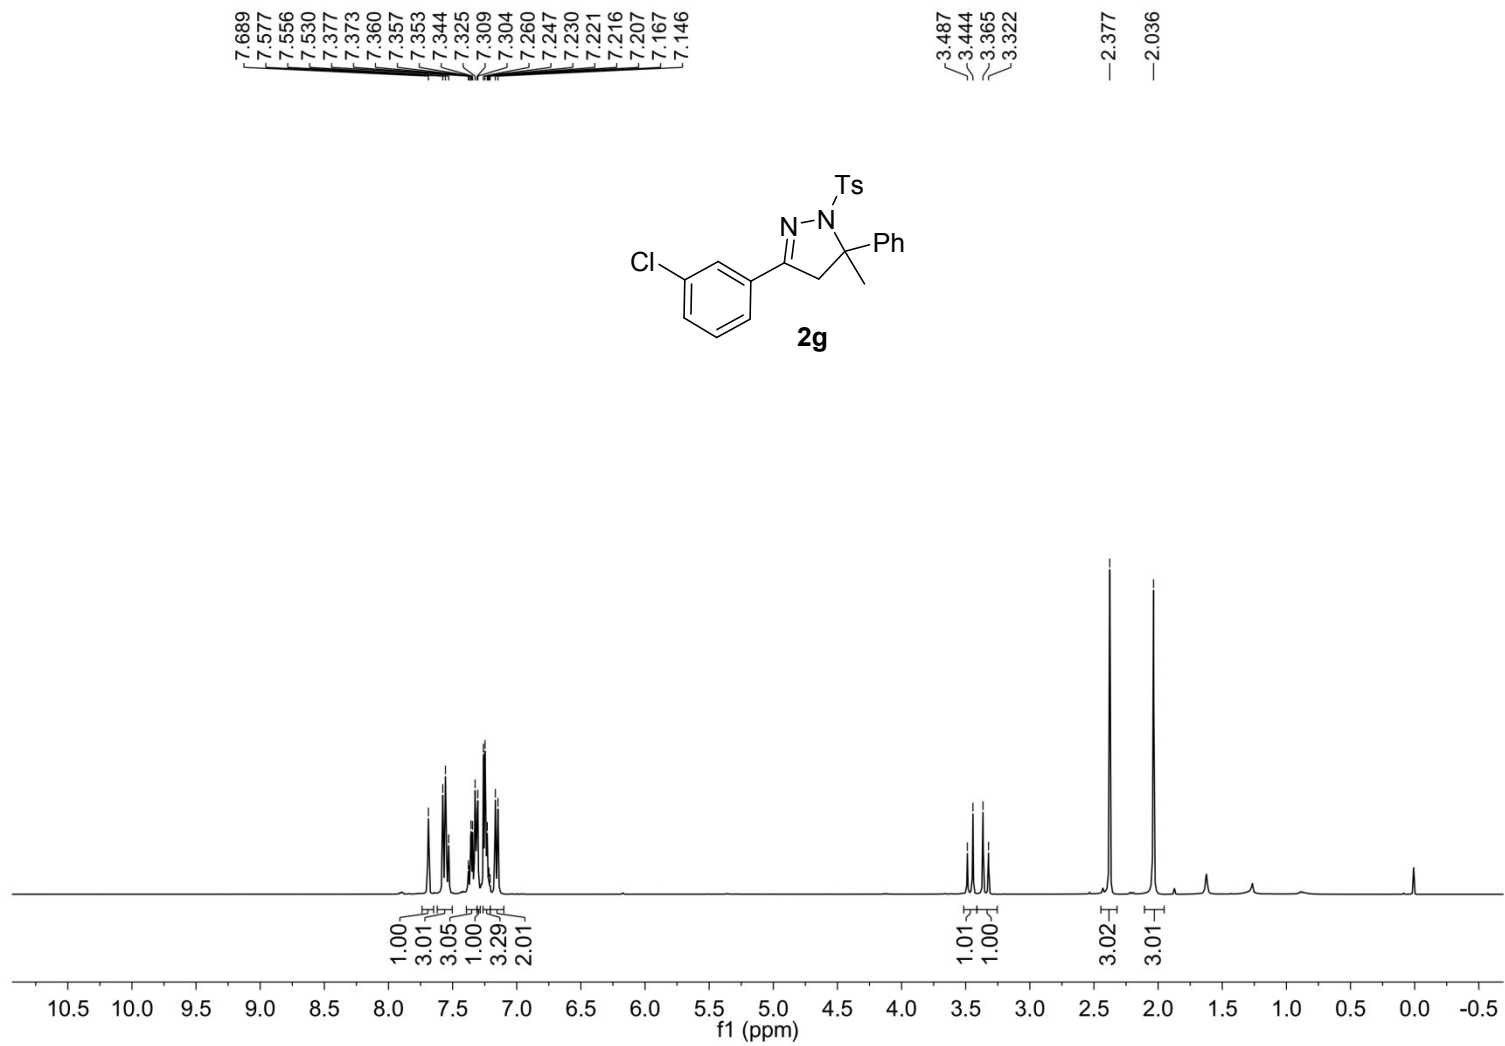



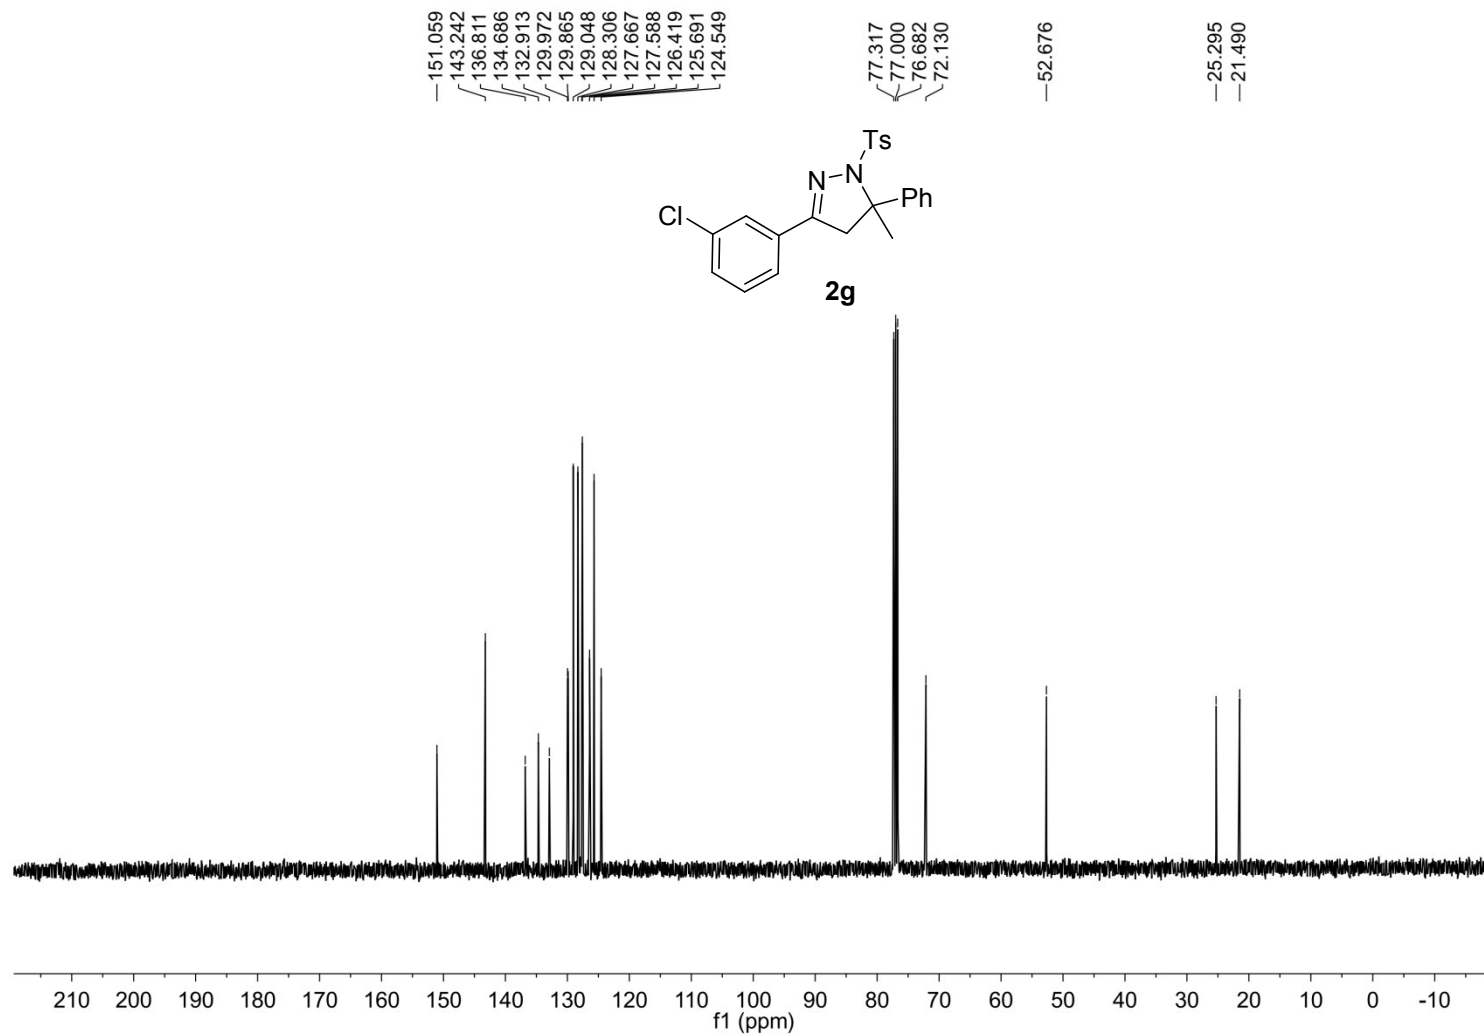

S33

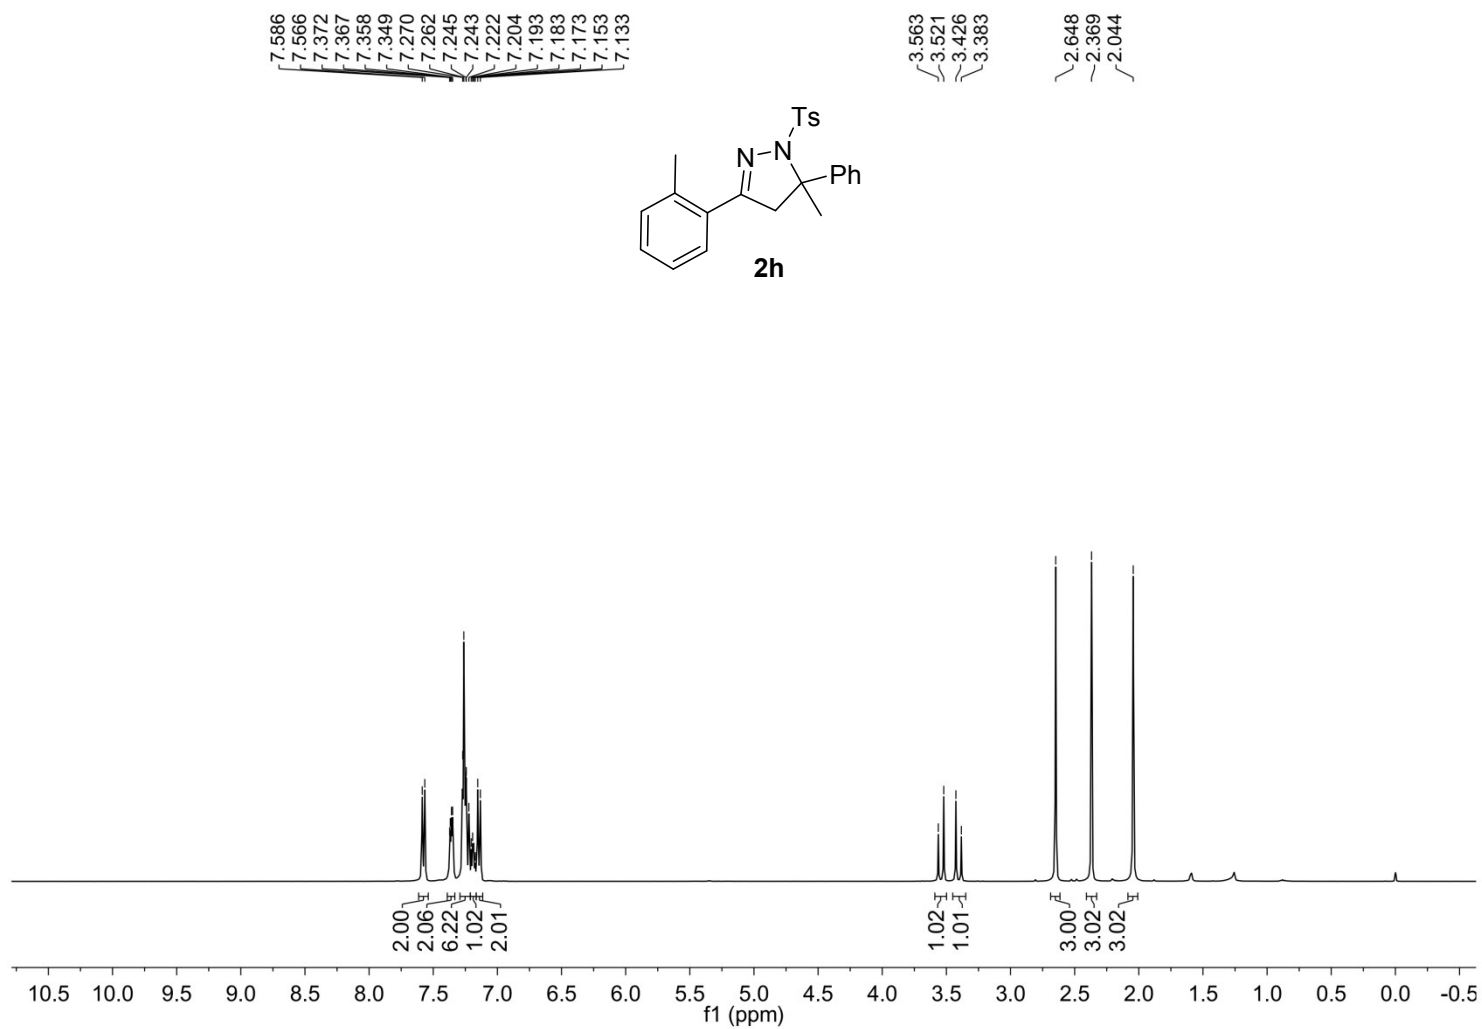

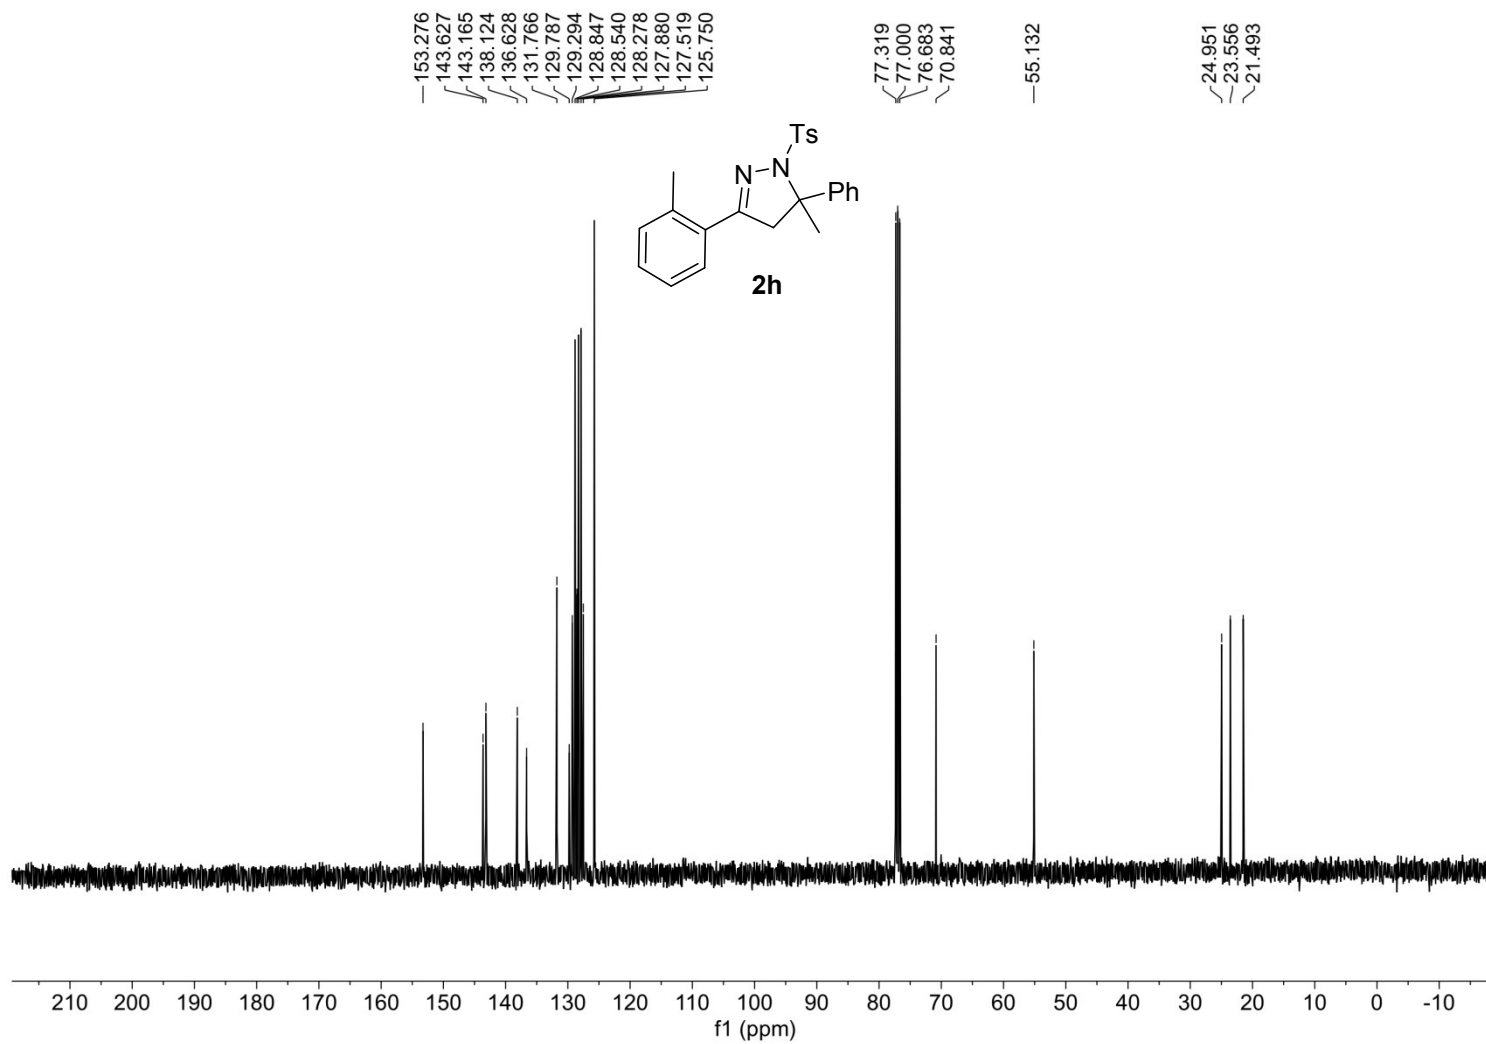

S35

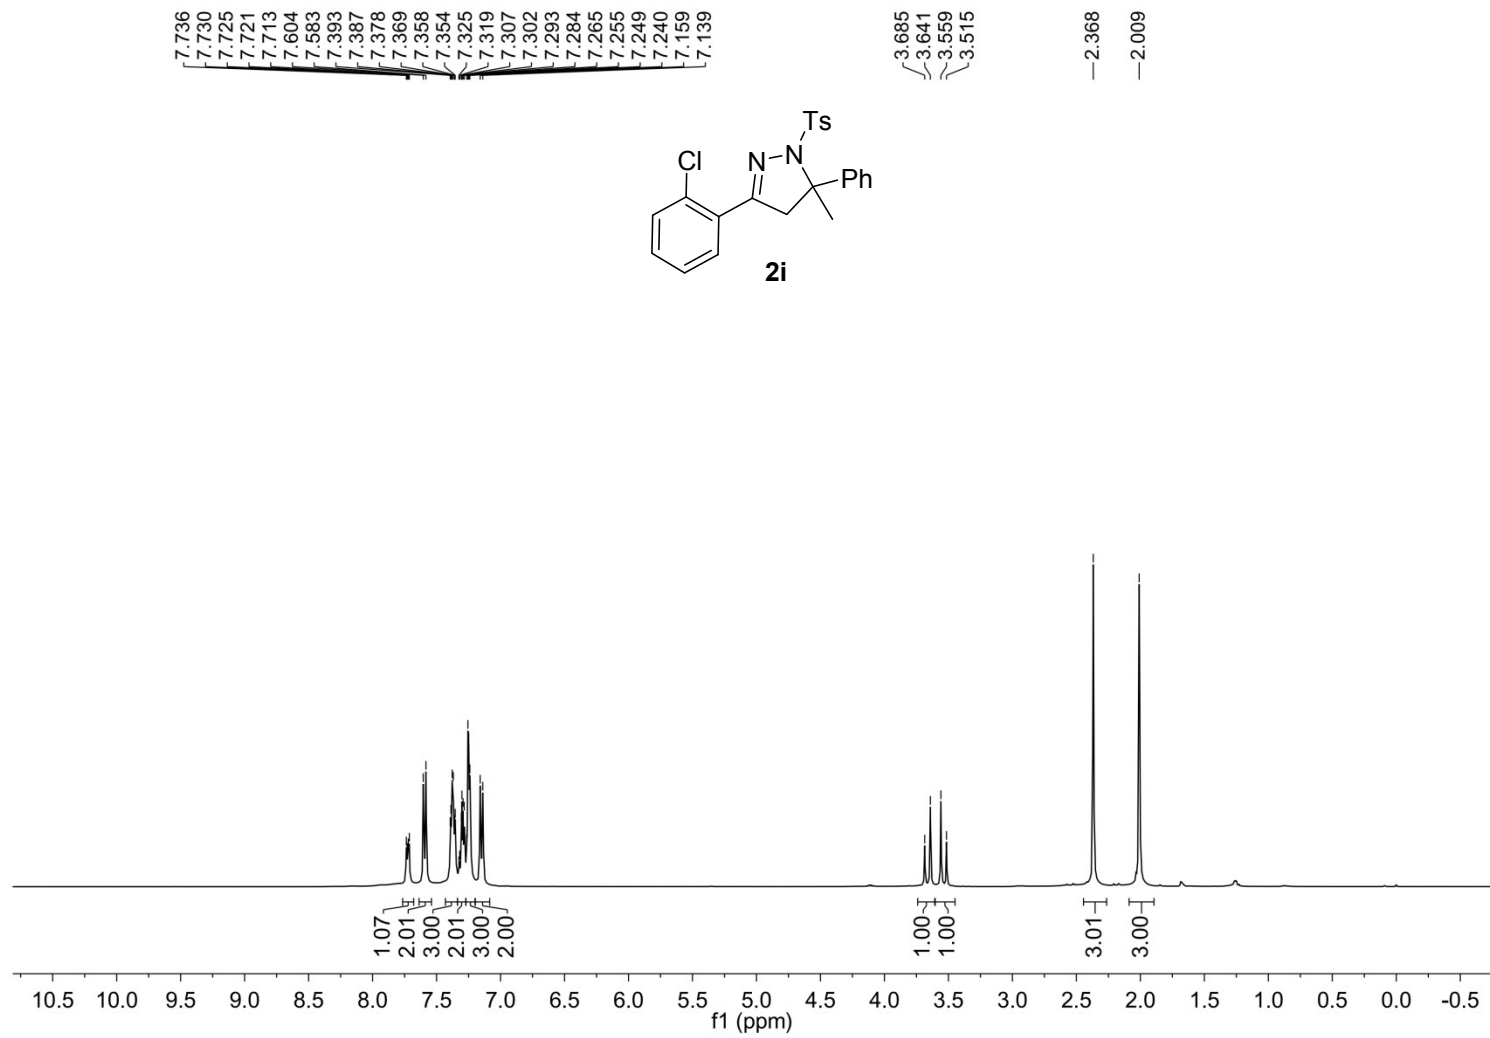

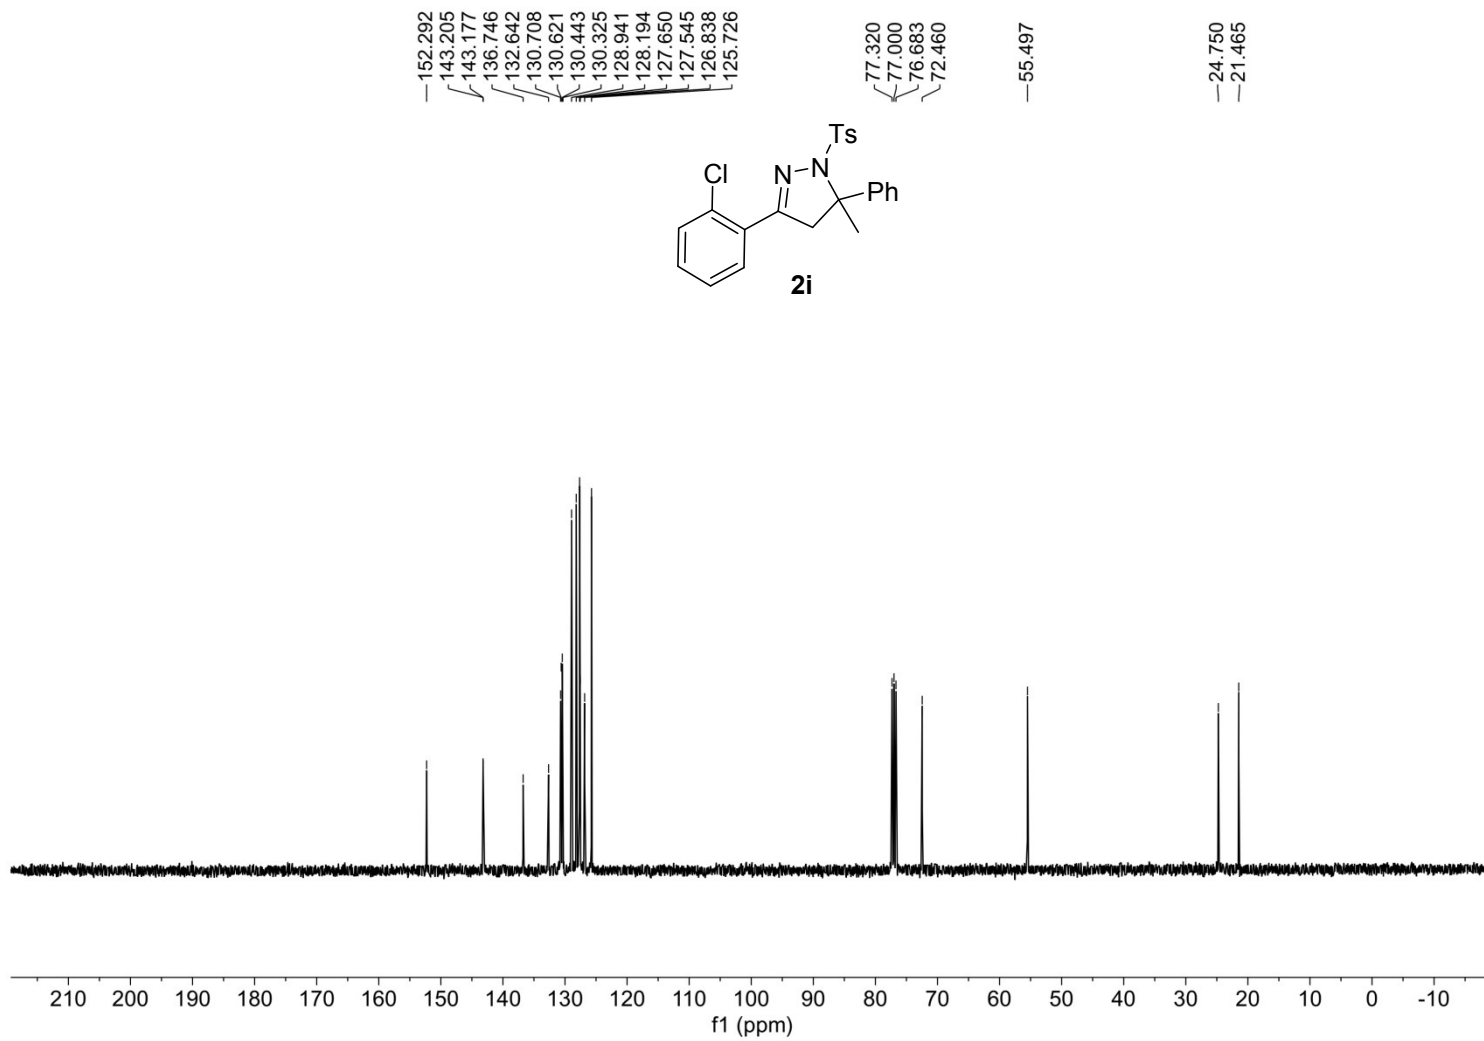

S37

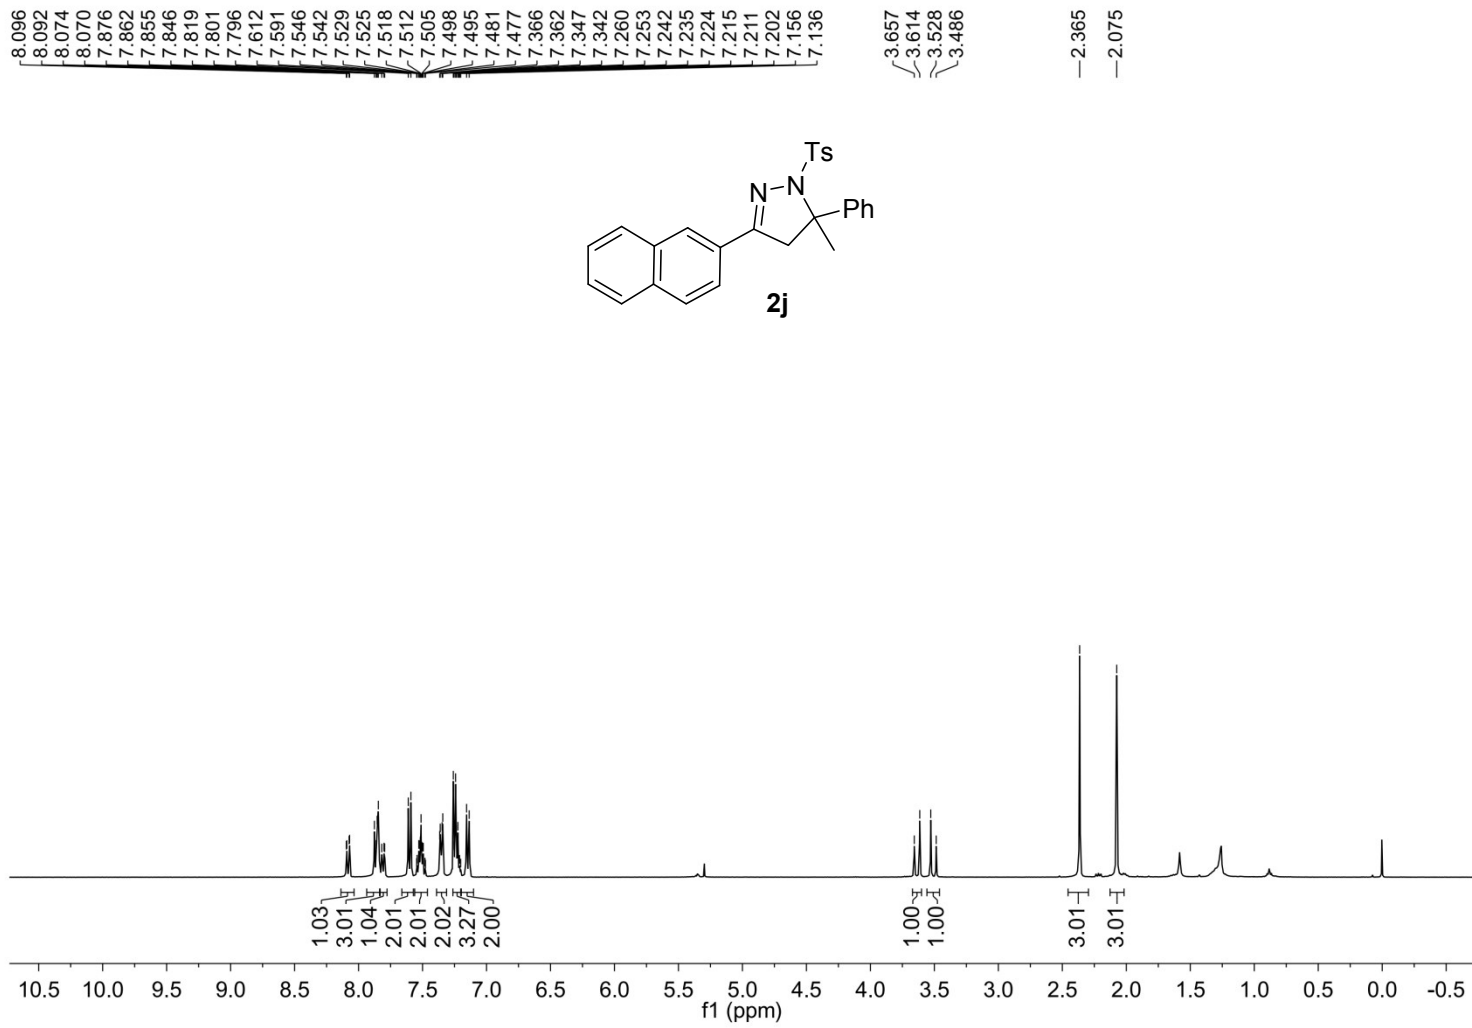

152.588  
143.388  
143.092  
136.898  
134.015  
132.861  
128.998  
128.748  
128.397  
128.307  
128.280  
127.825  
127.630  
127.611  
127.152  
126.707  
126.680  
125.811  
123.477

77.318  
77.000  
76.682  
71.974

52.832

25.375  
21.504

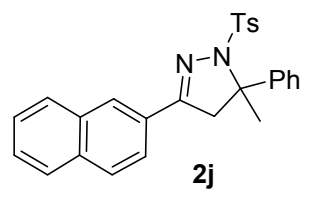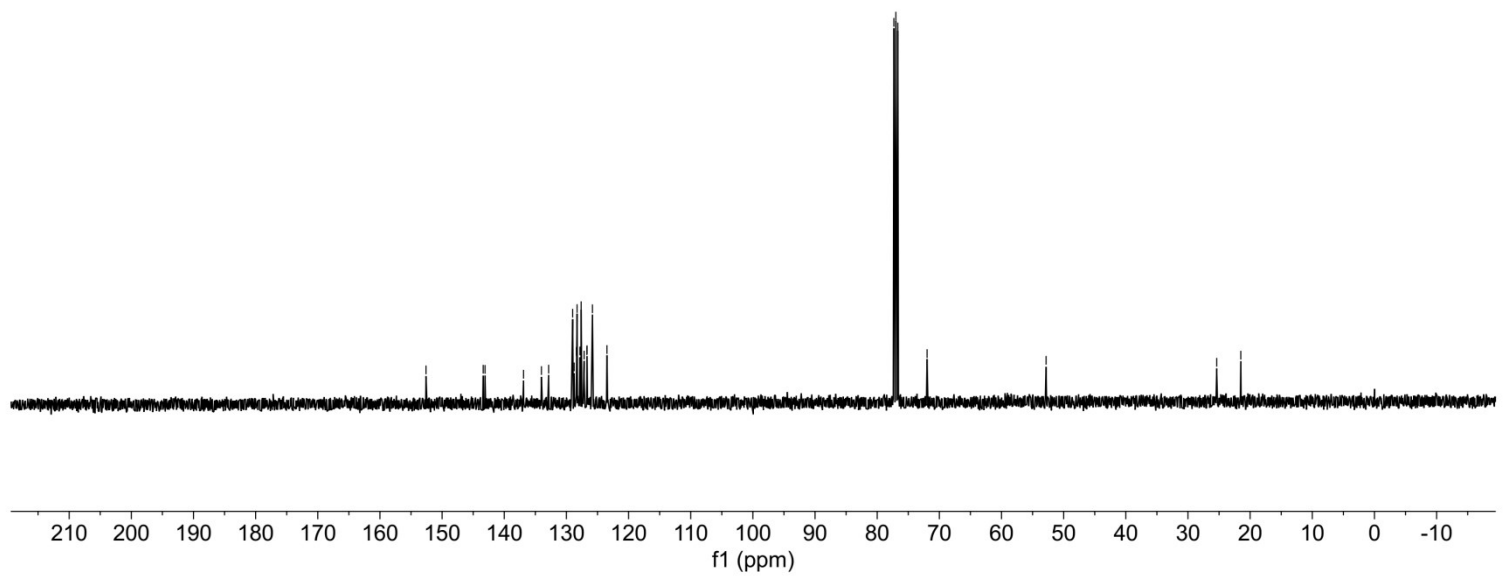

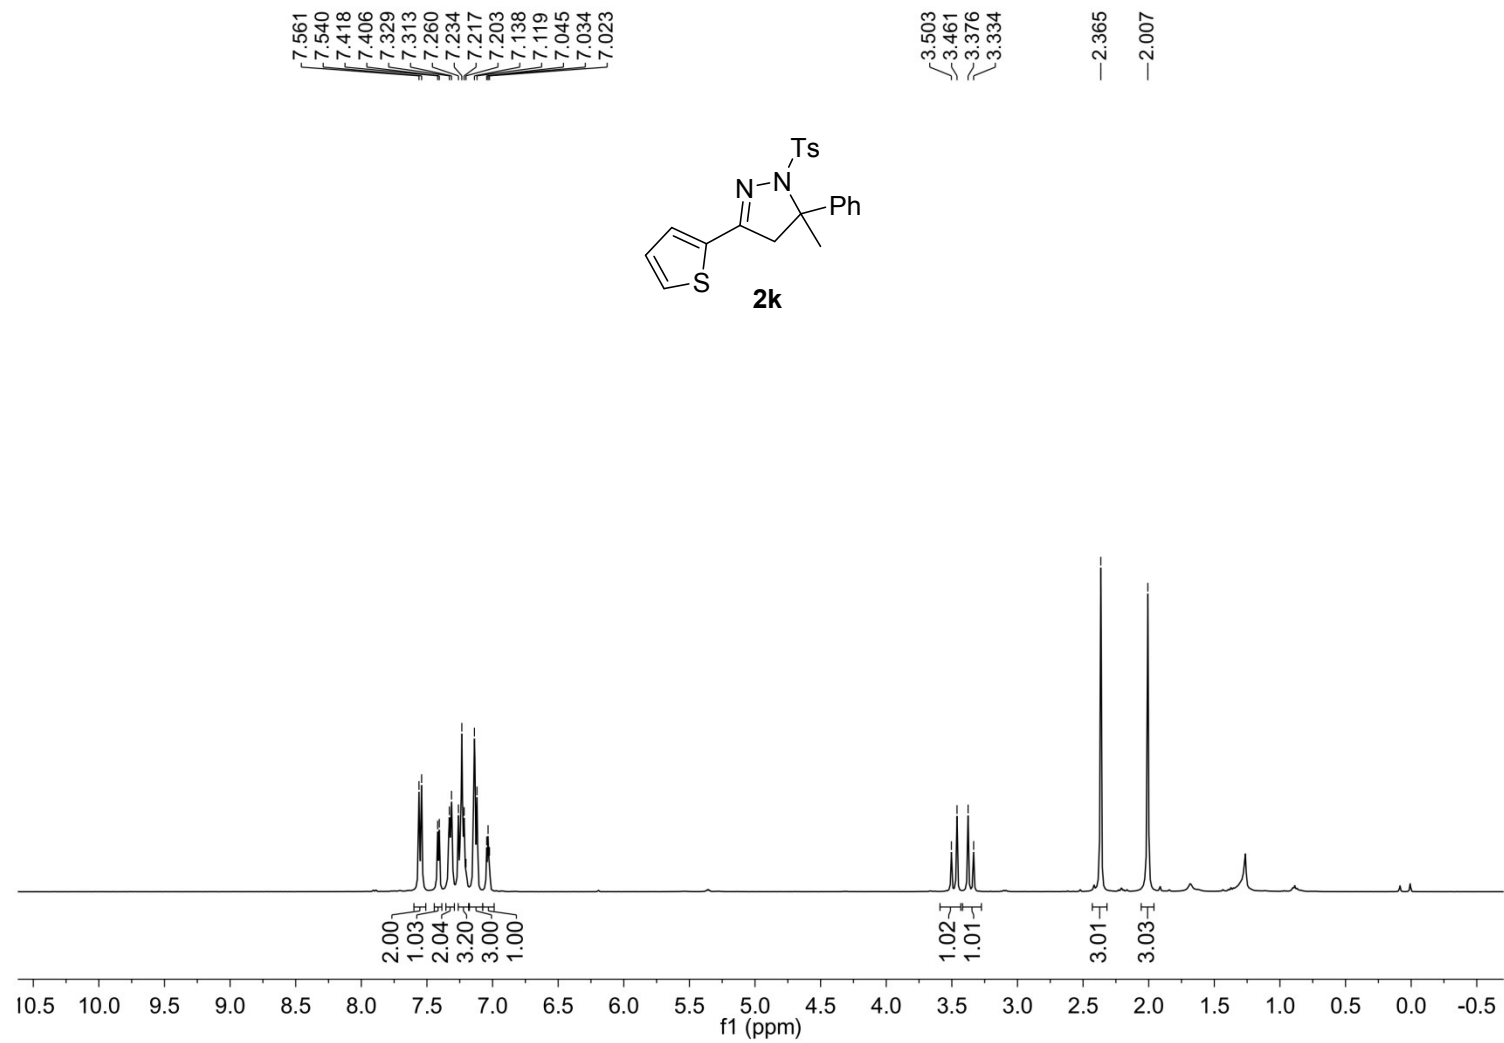

S40



148.367  
143.052  
143.038  
136.669  
134.737  
128.914  
128.633  
128.222  
128.105  
127.591  
127.388  
125.756

77.319  
77.000  
76.682  
71.958

53.387

25.147  
21.473

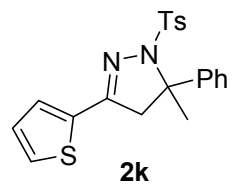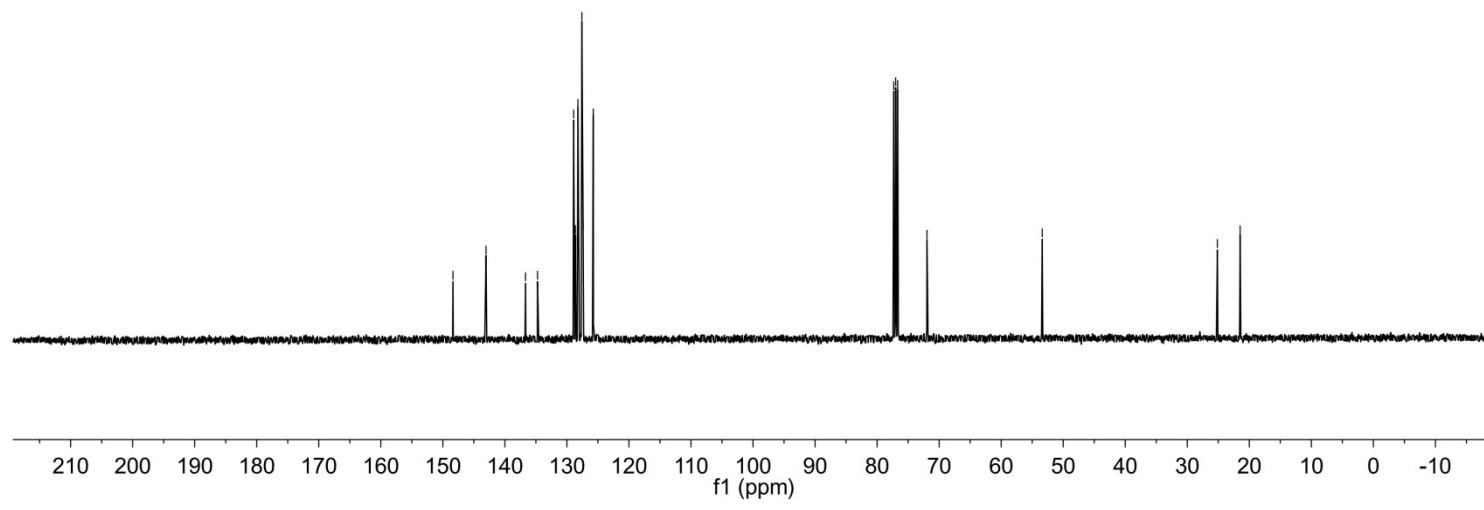

S41

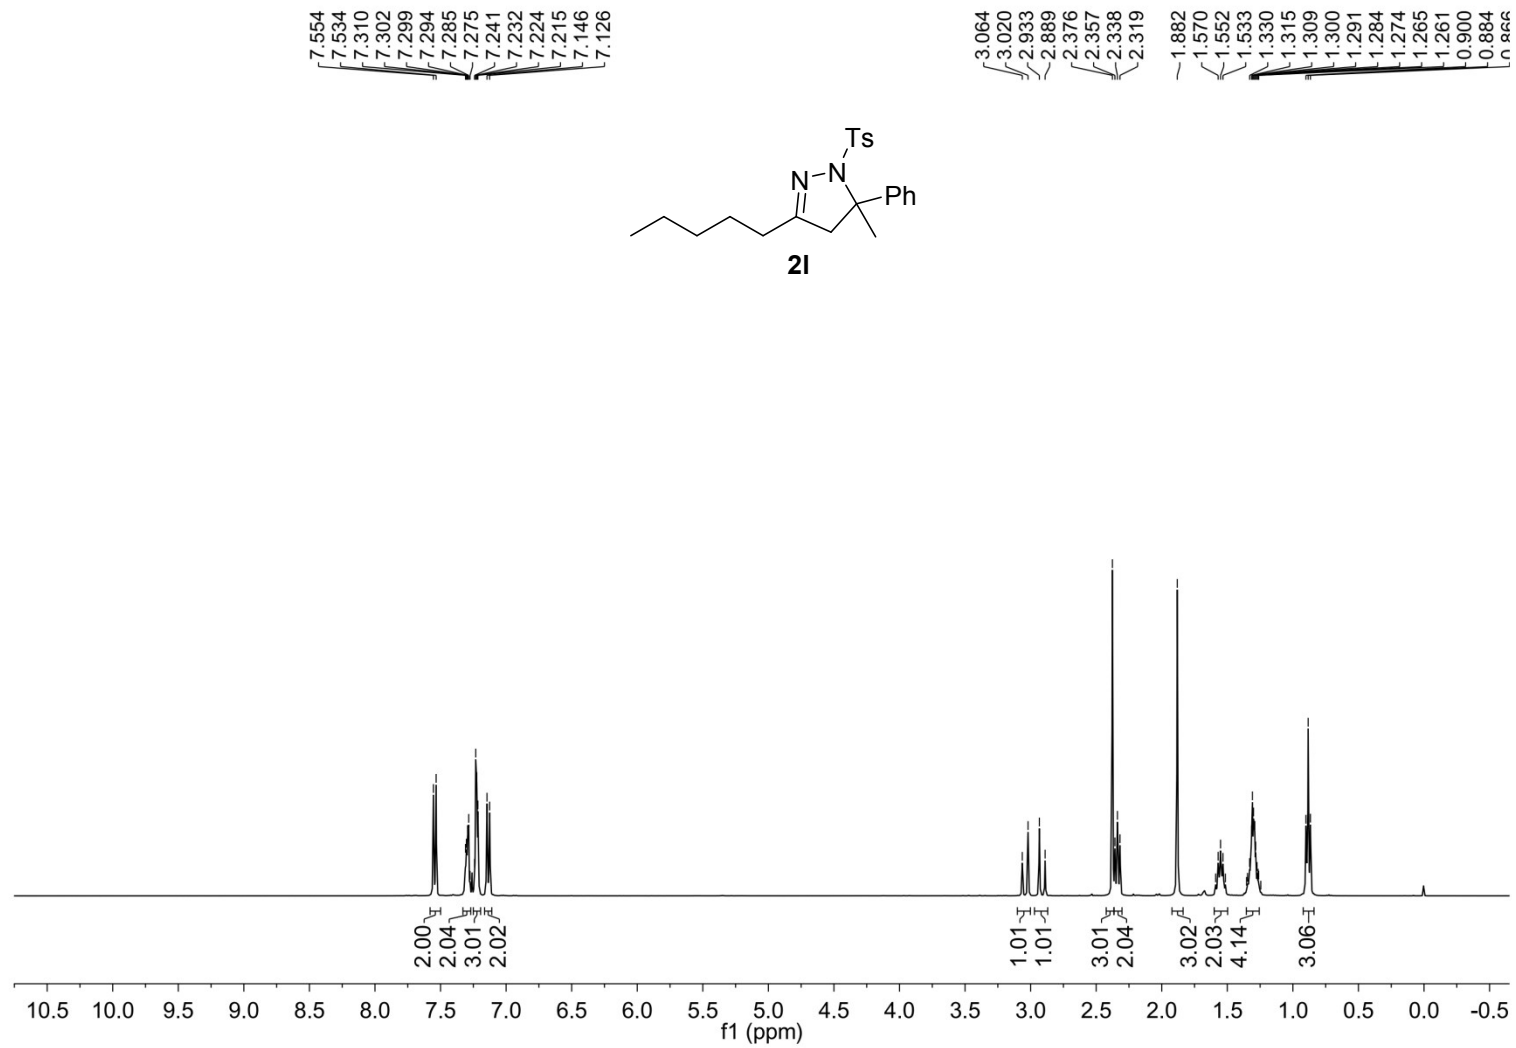

S42

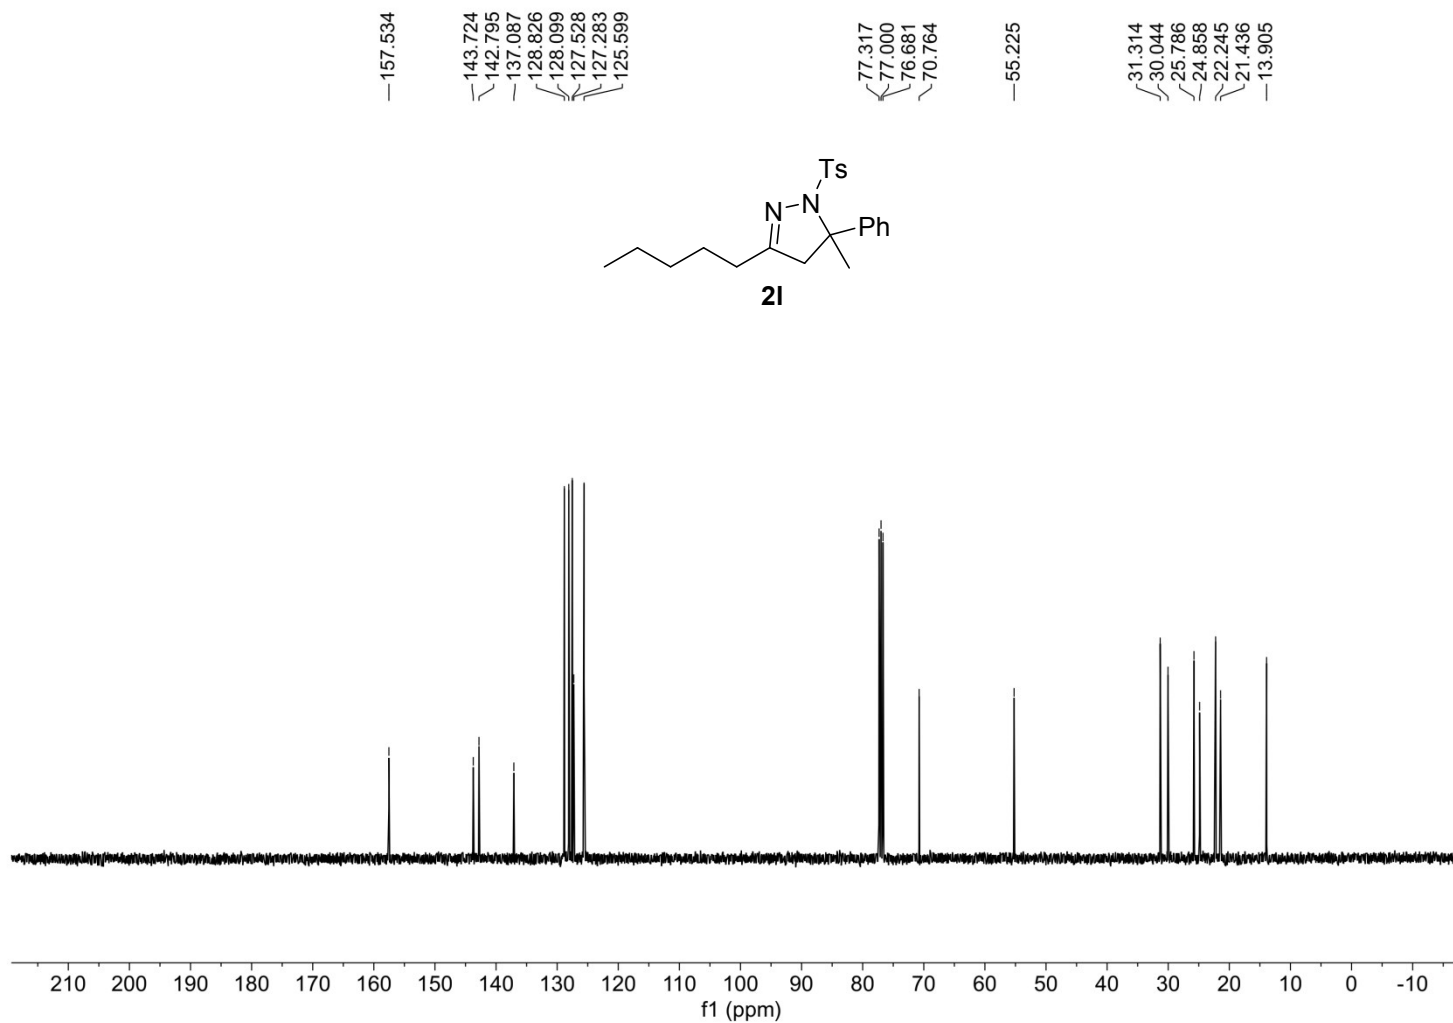

S43

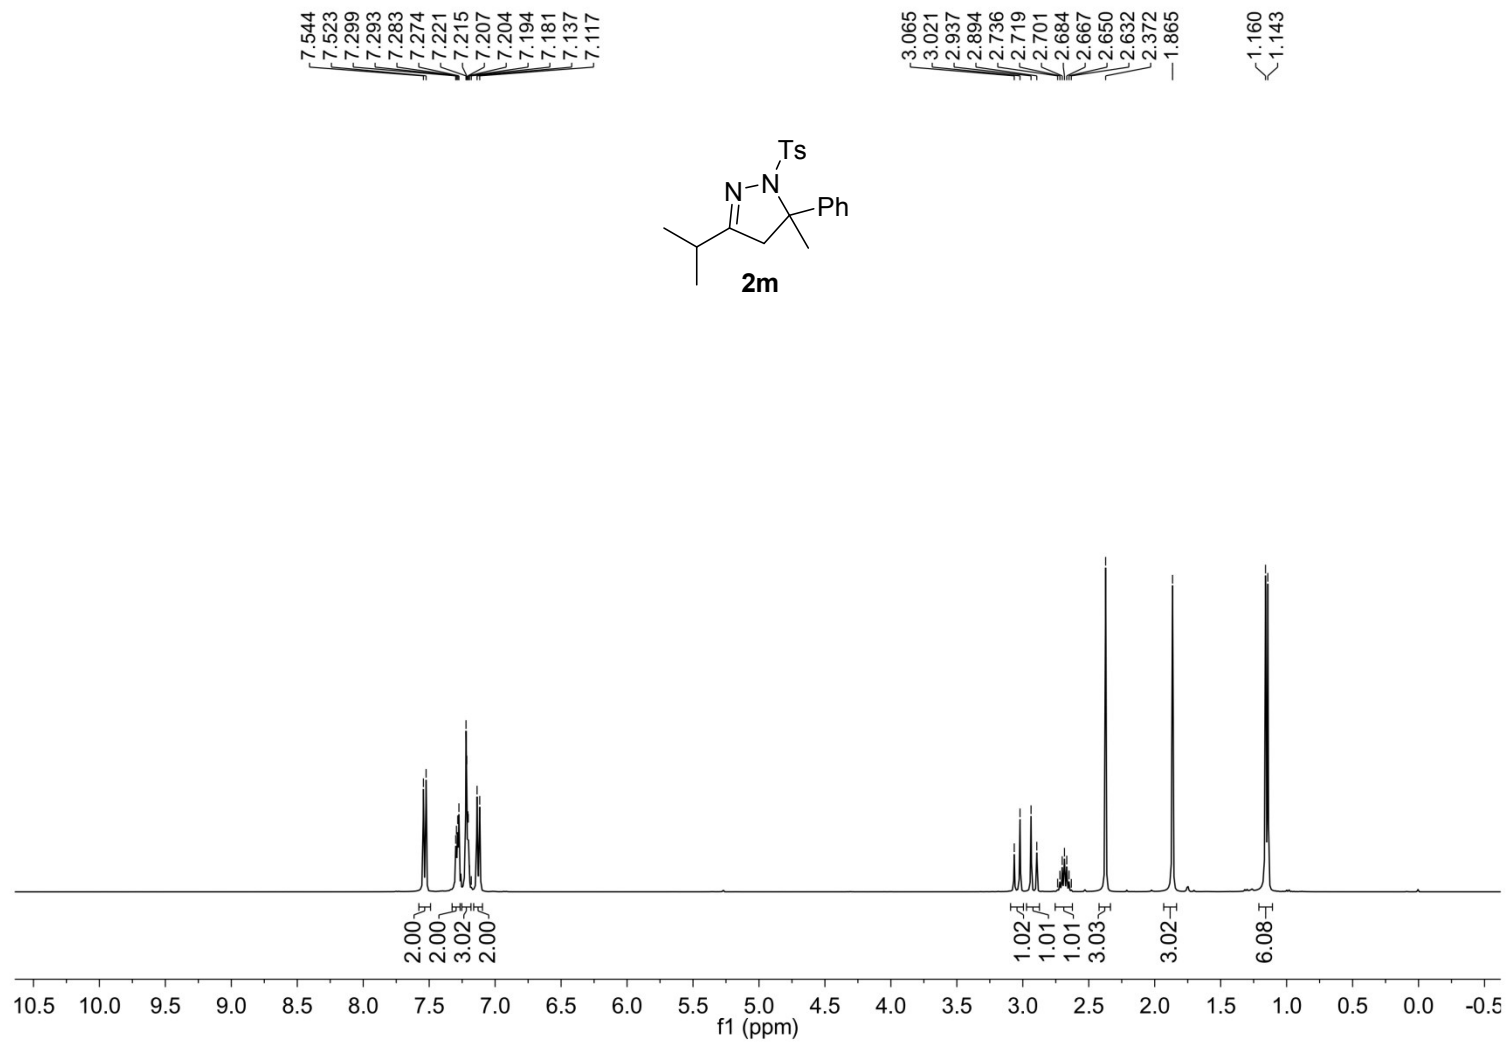

S44

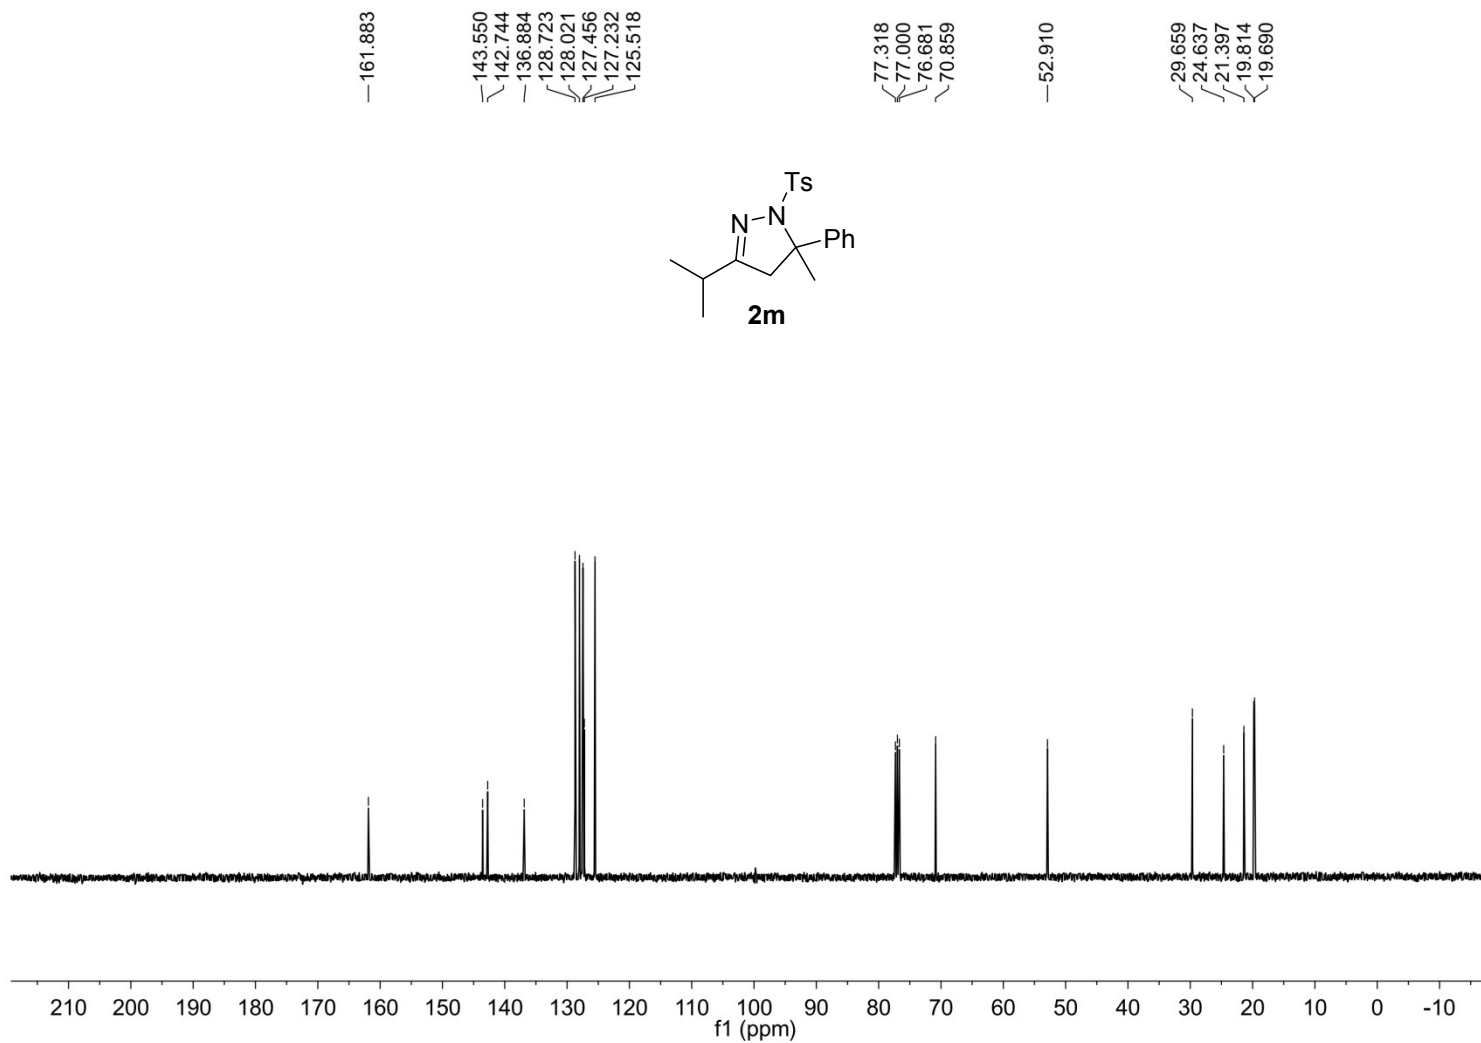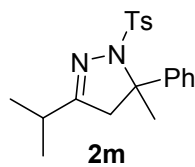

S45

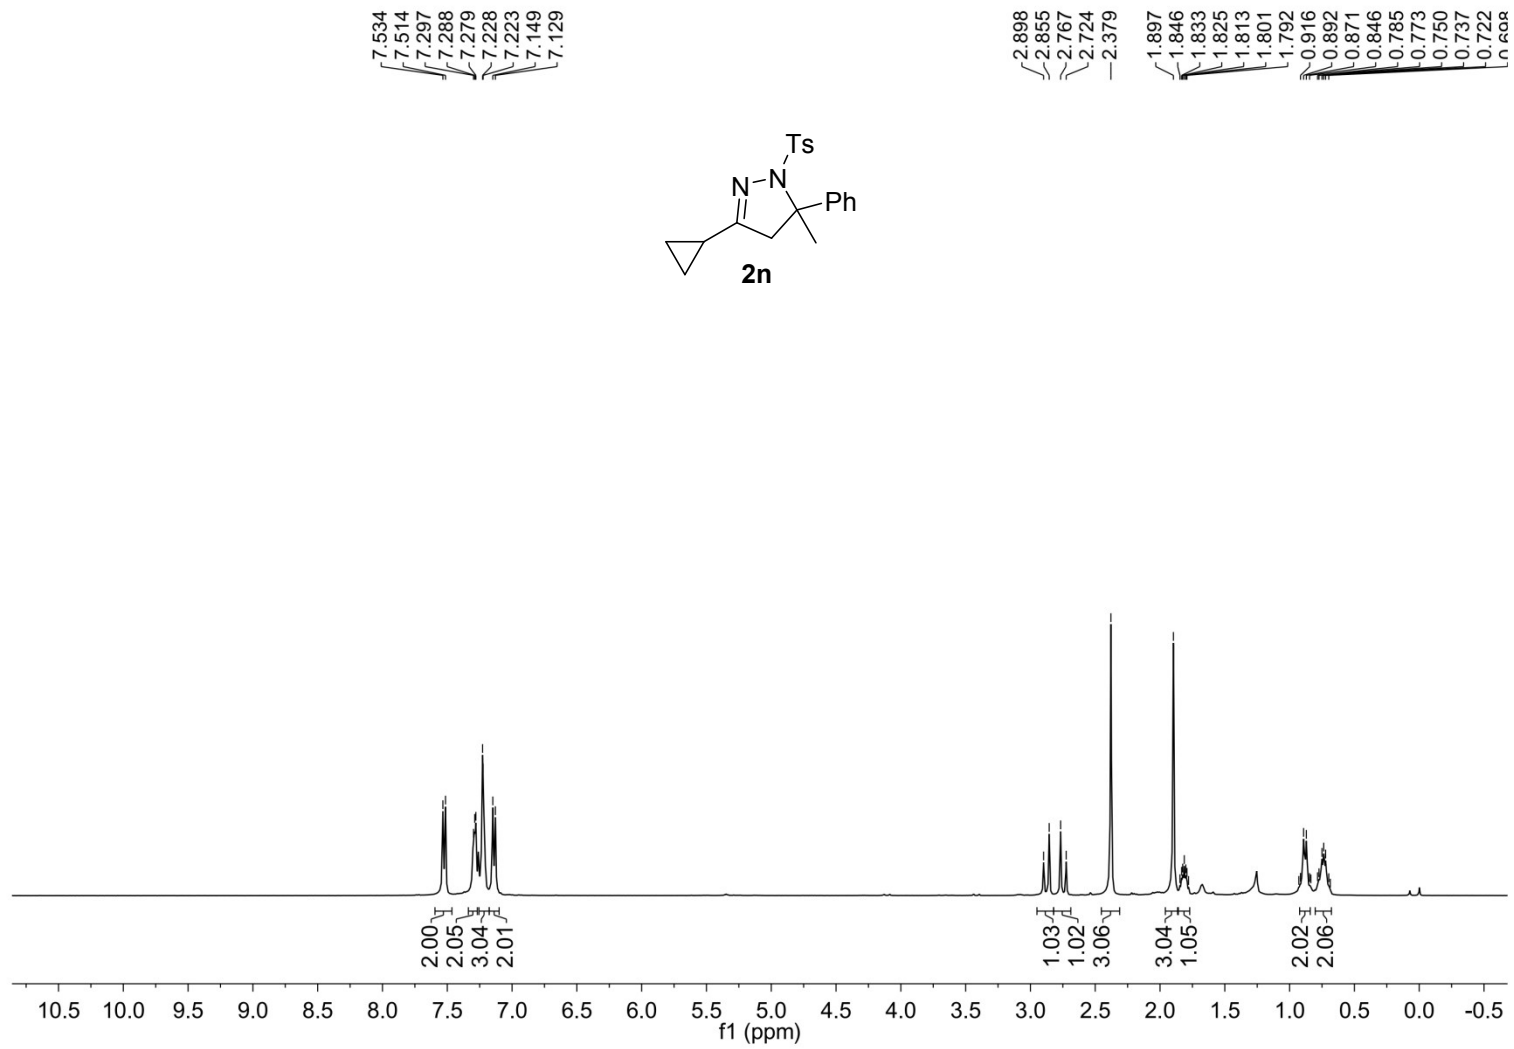

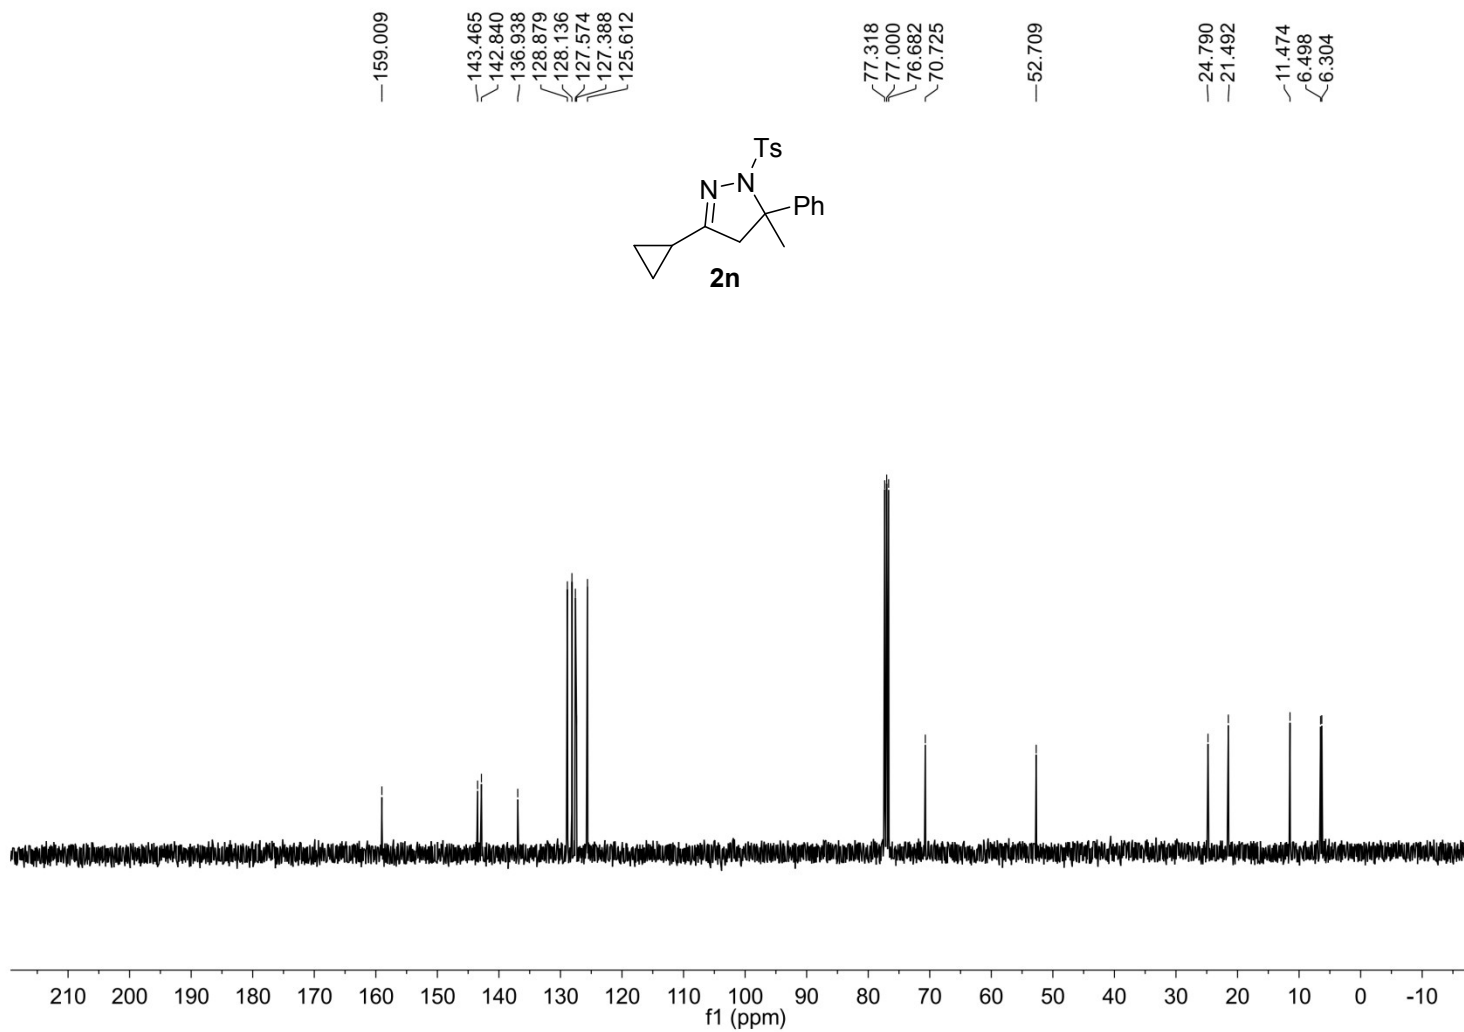

S47

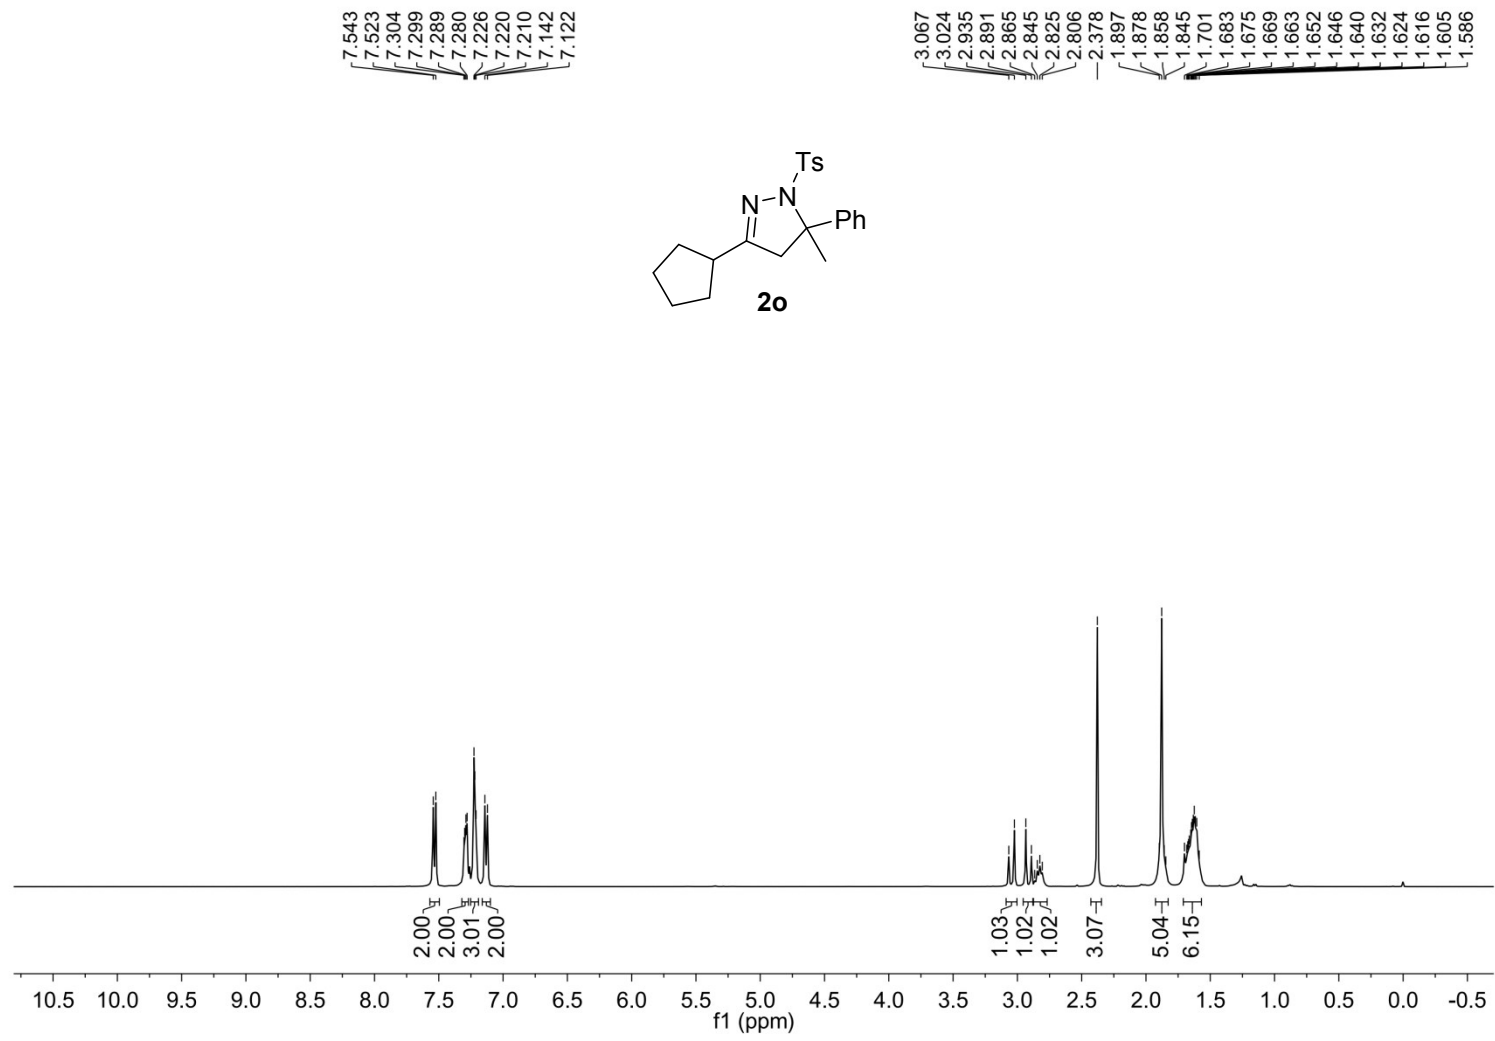



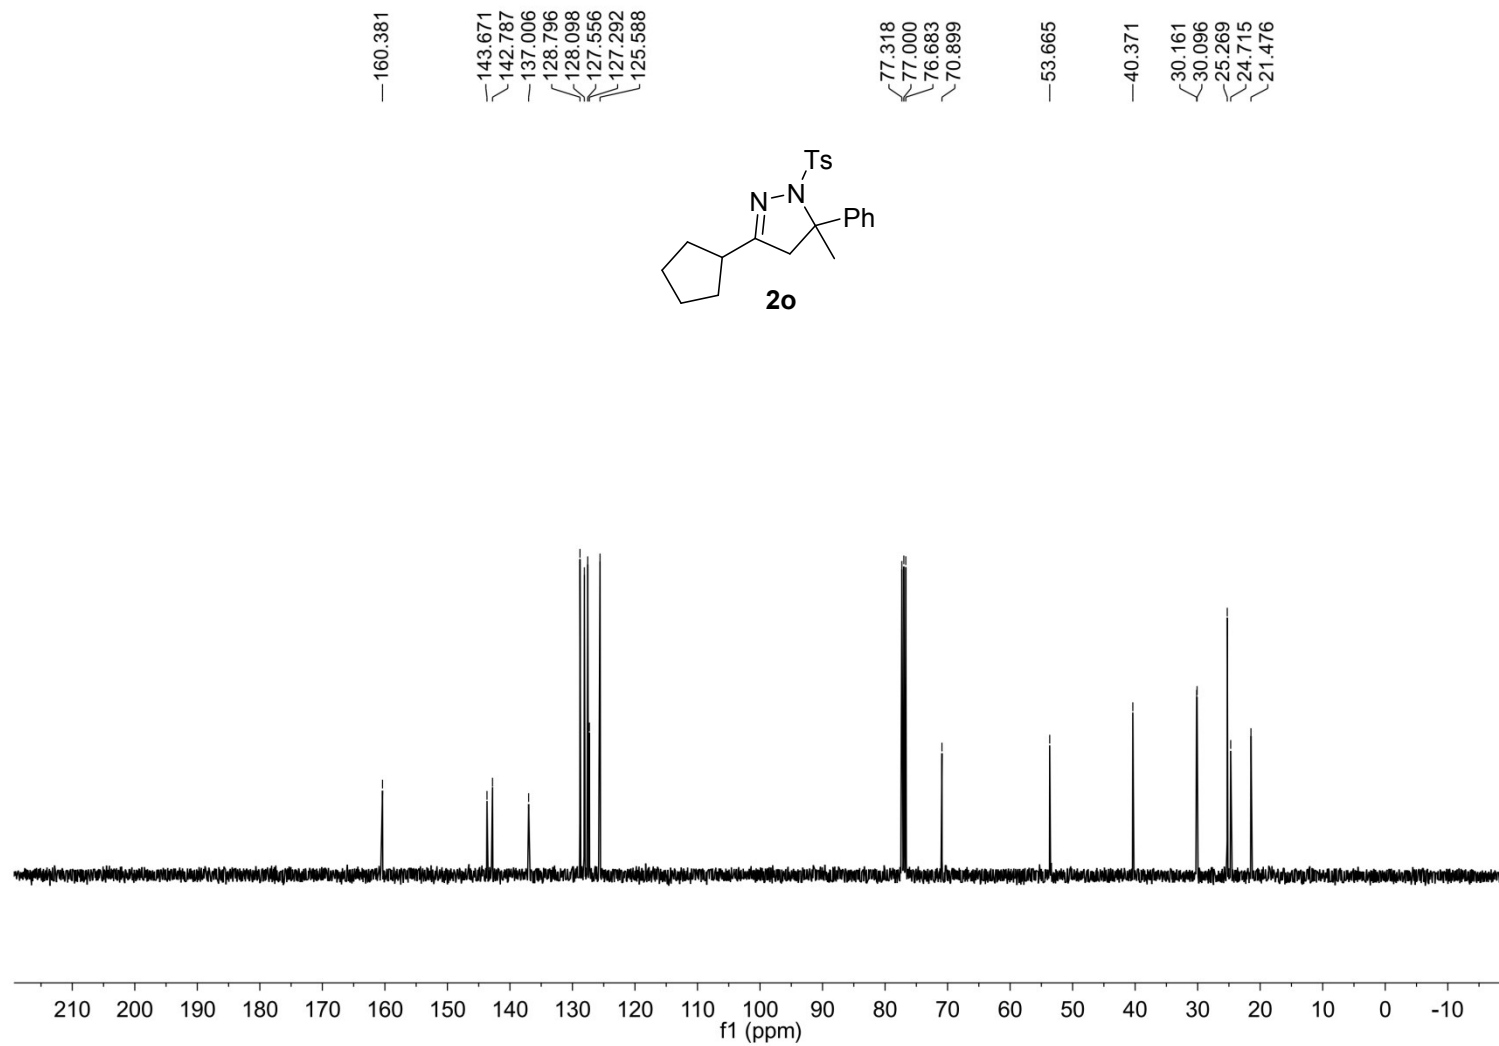

S49

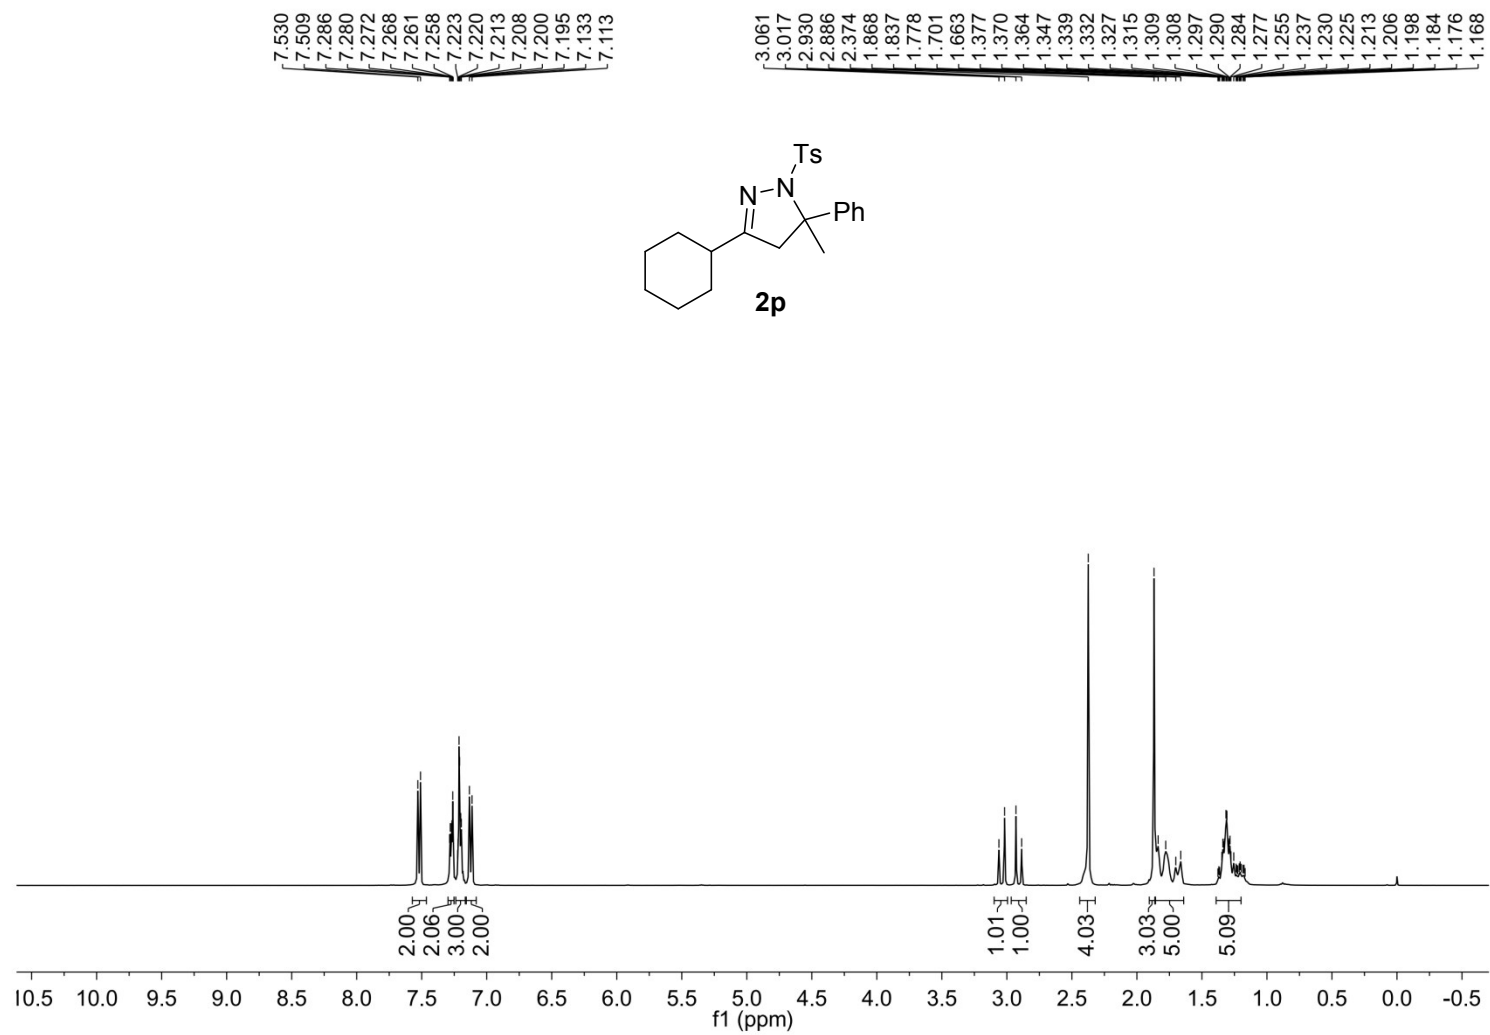

S50

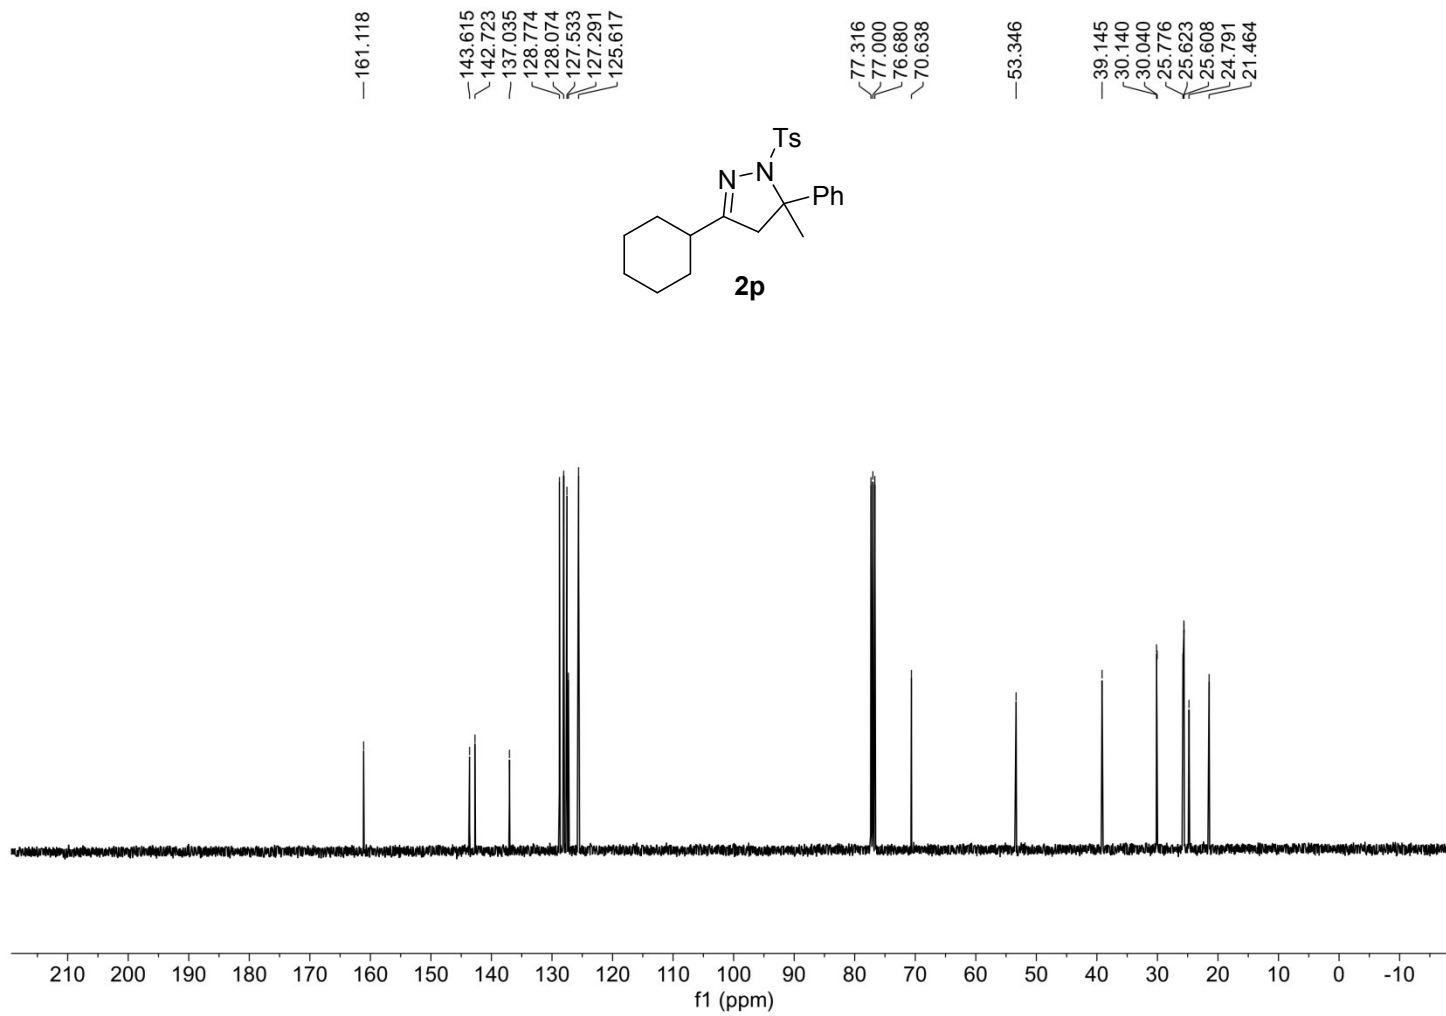

S51

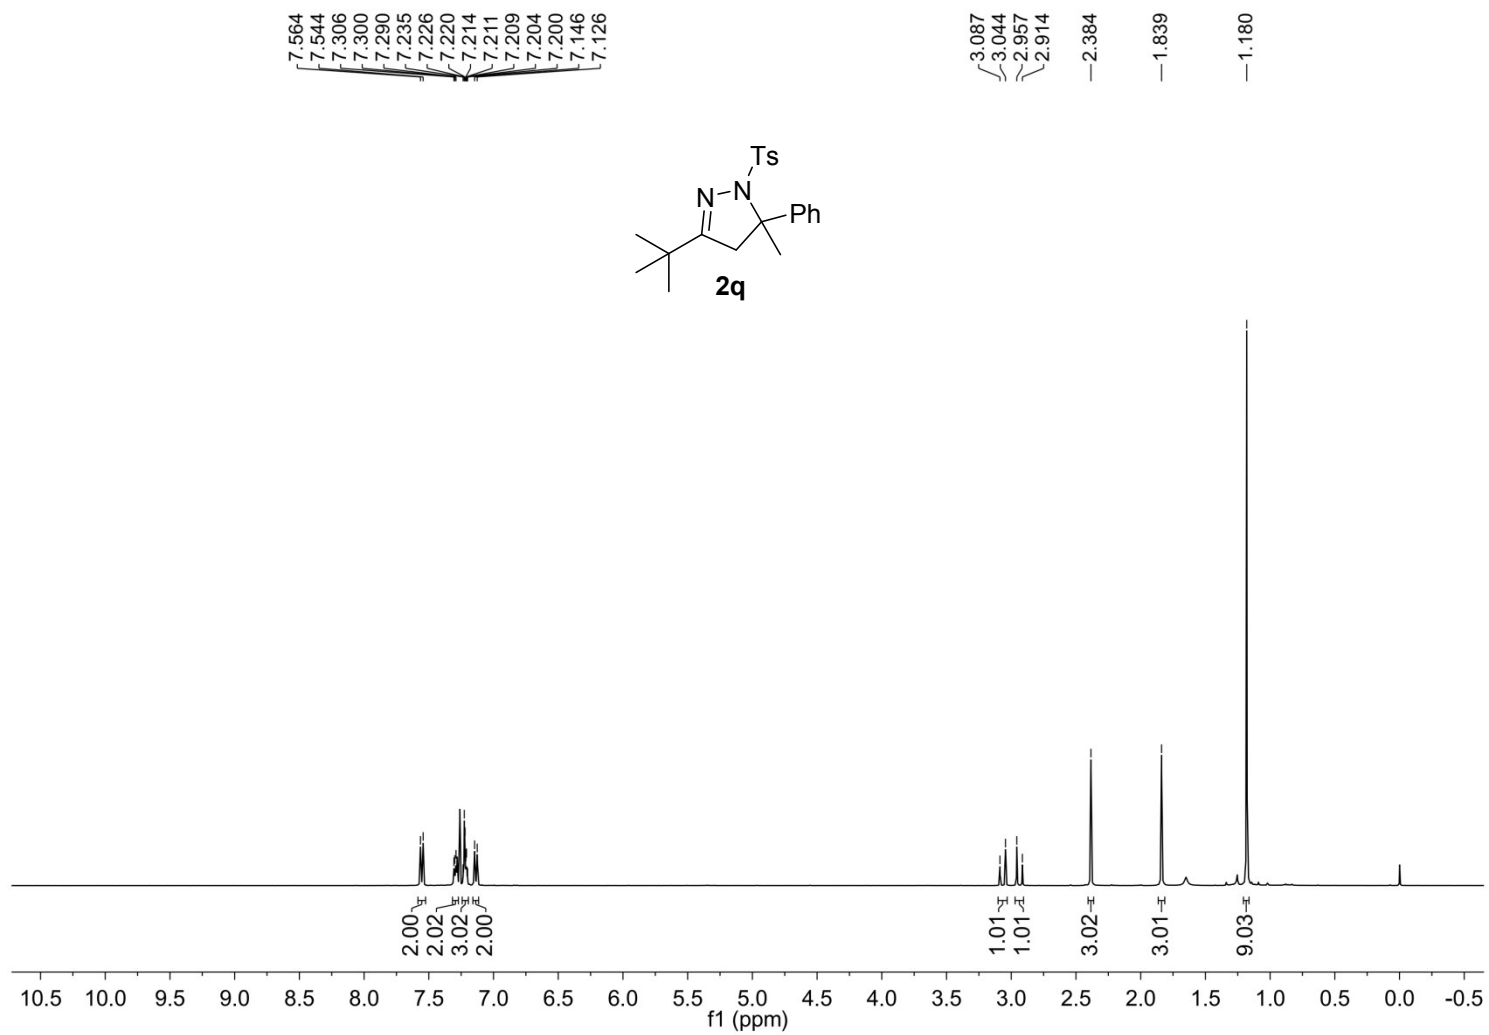

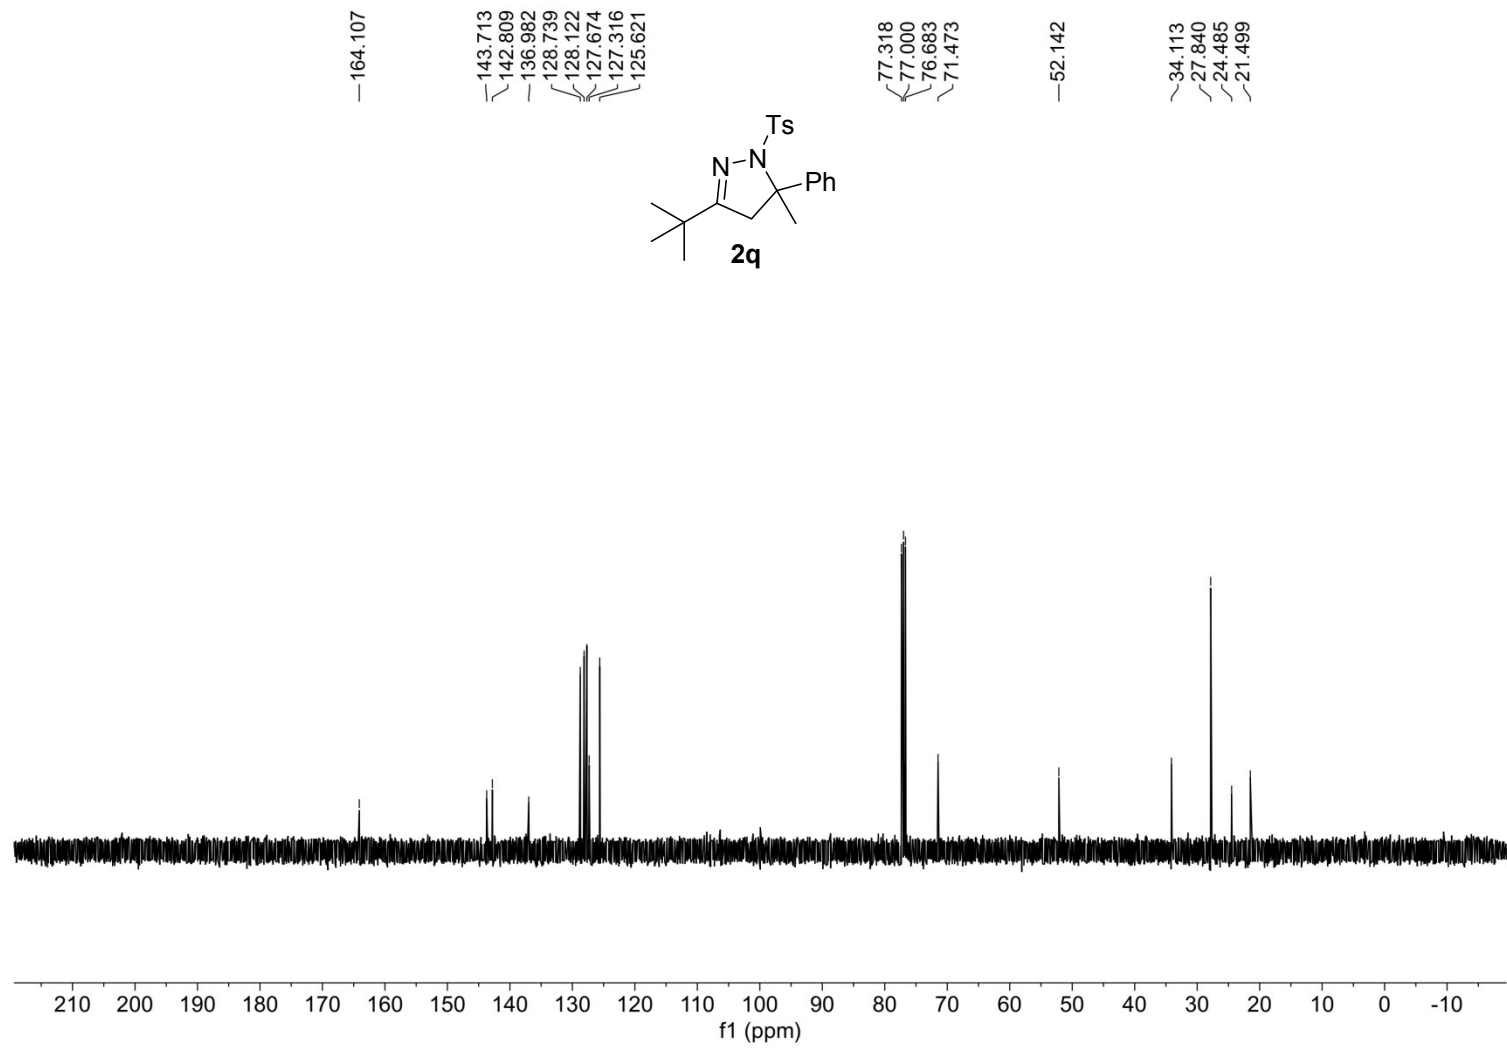

S53

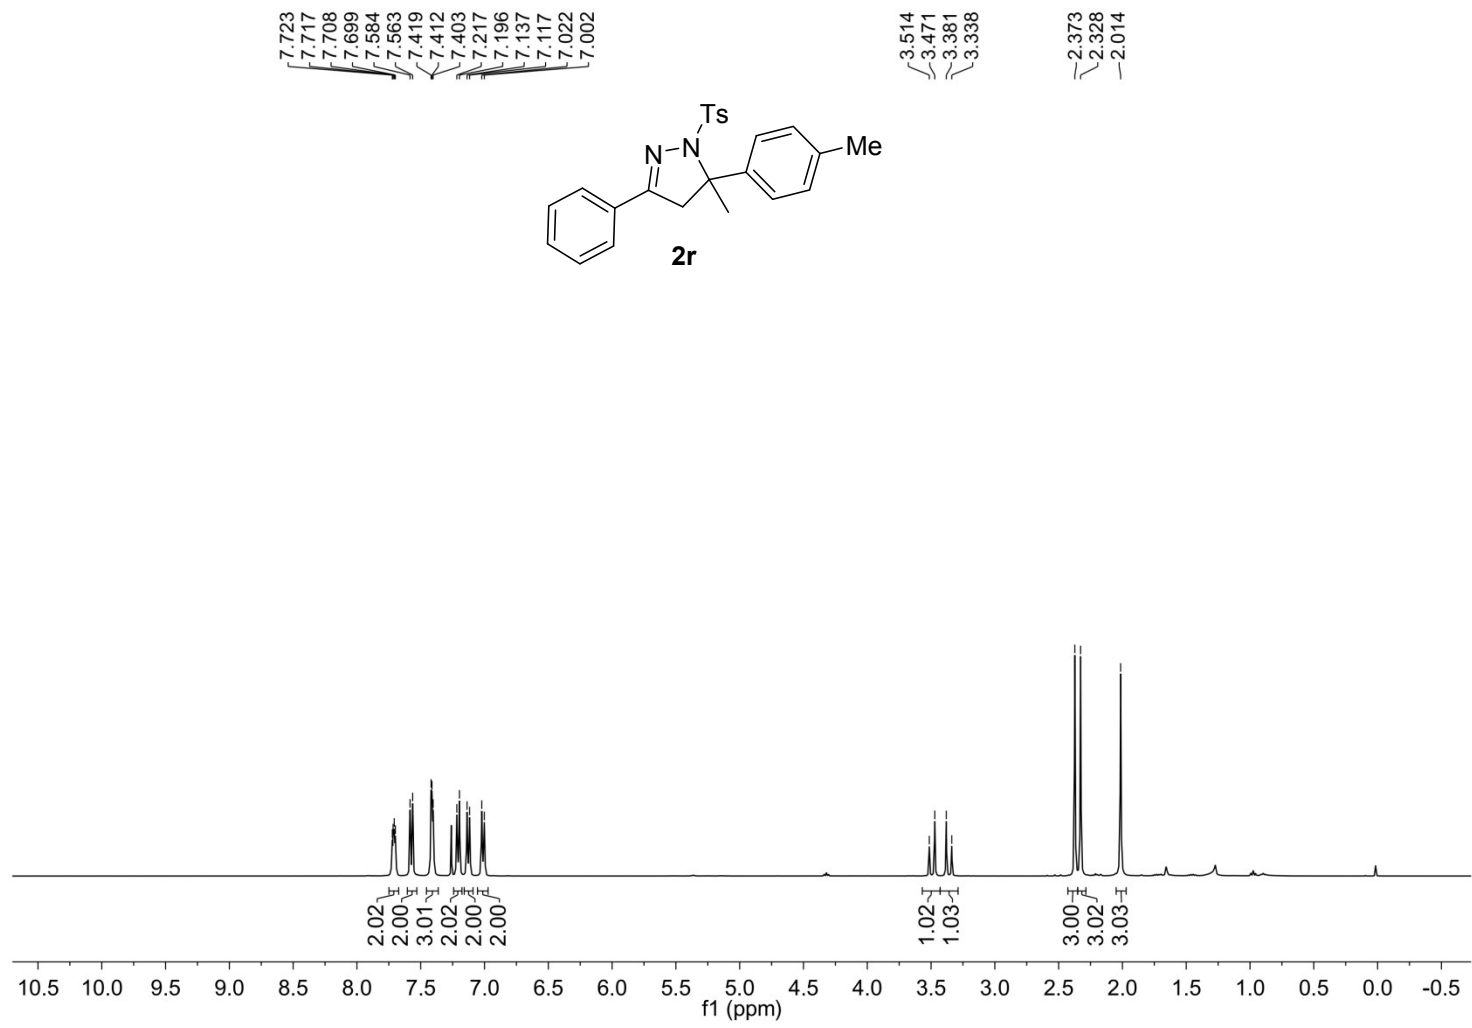

152.526  
142.905  
140.362  
137.286  
136.905  
131.125  
130.050  
128.821  
128.785  
128.554  
127.531  
126.477  
125.653

77.318  
77.000  
76.683  
71.648

52.655

25.270  
21.465  
20.964

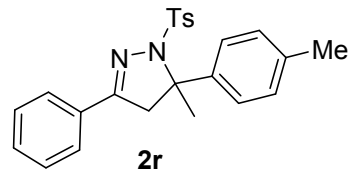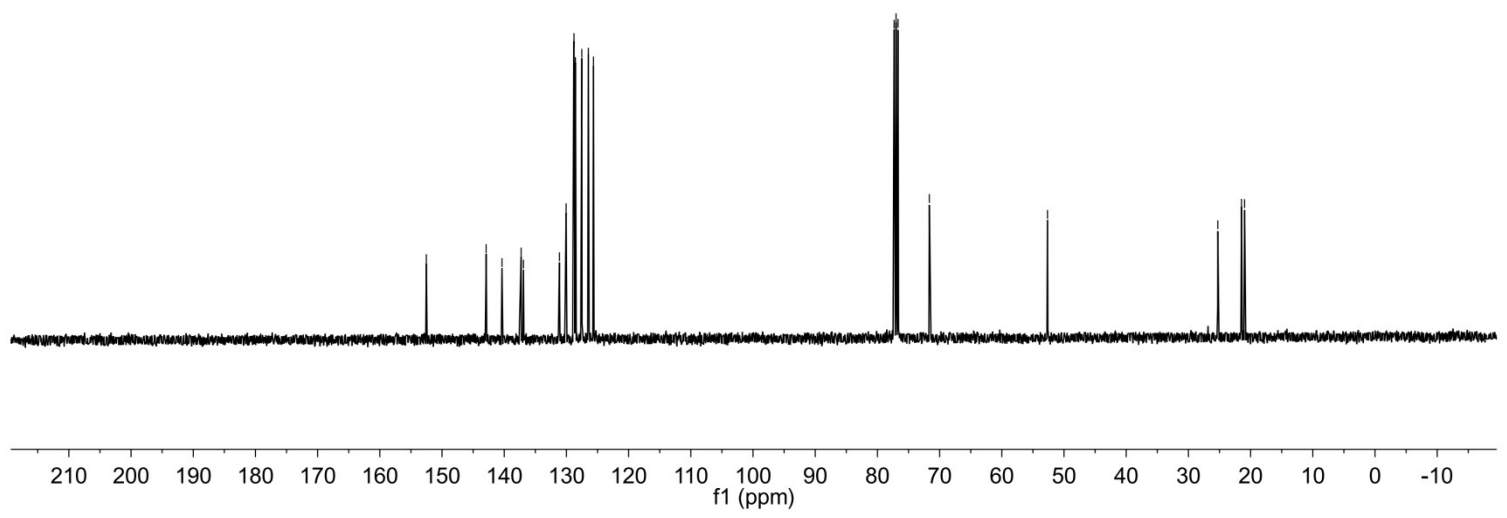

S55

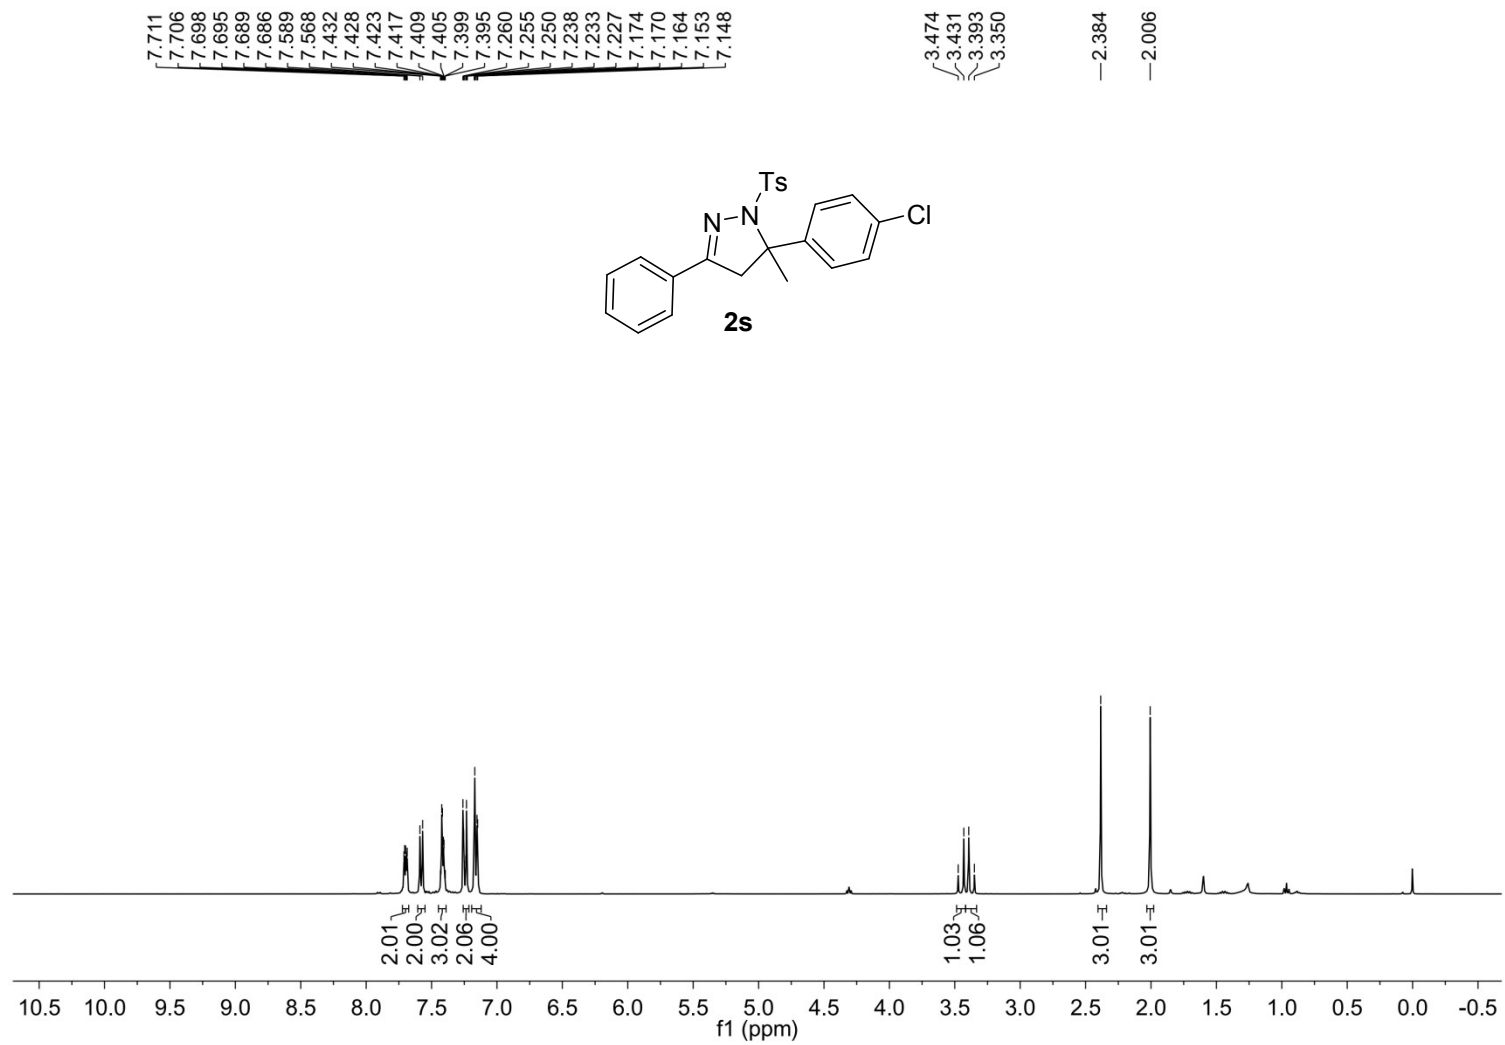

S56



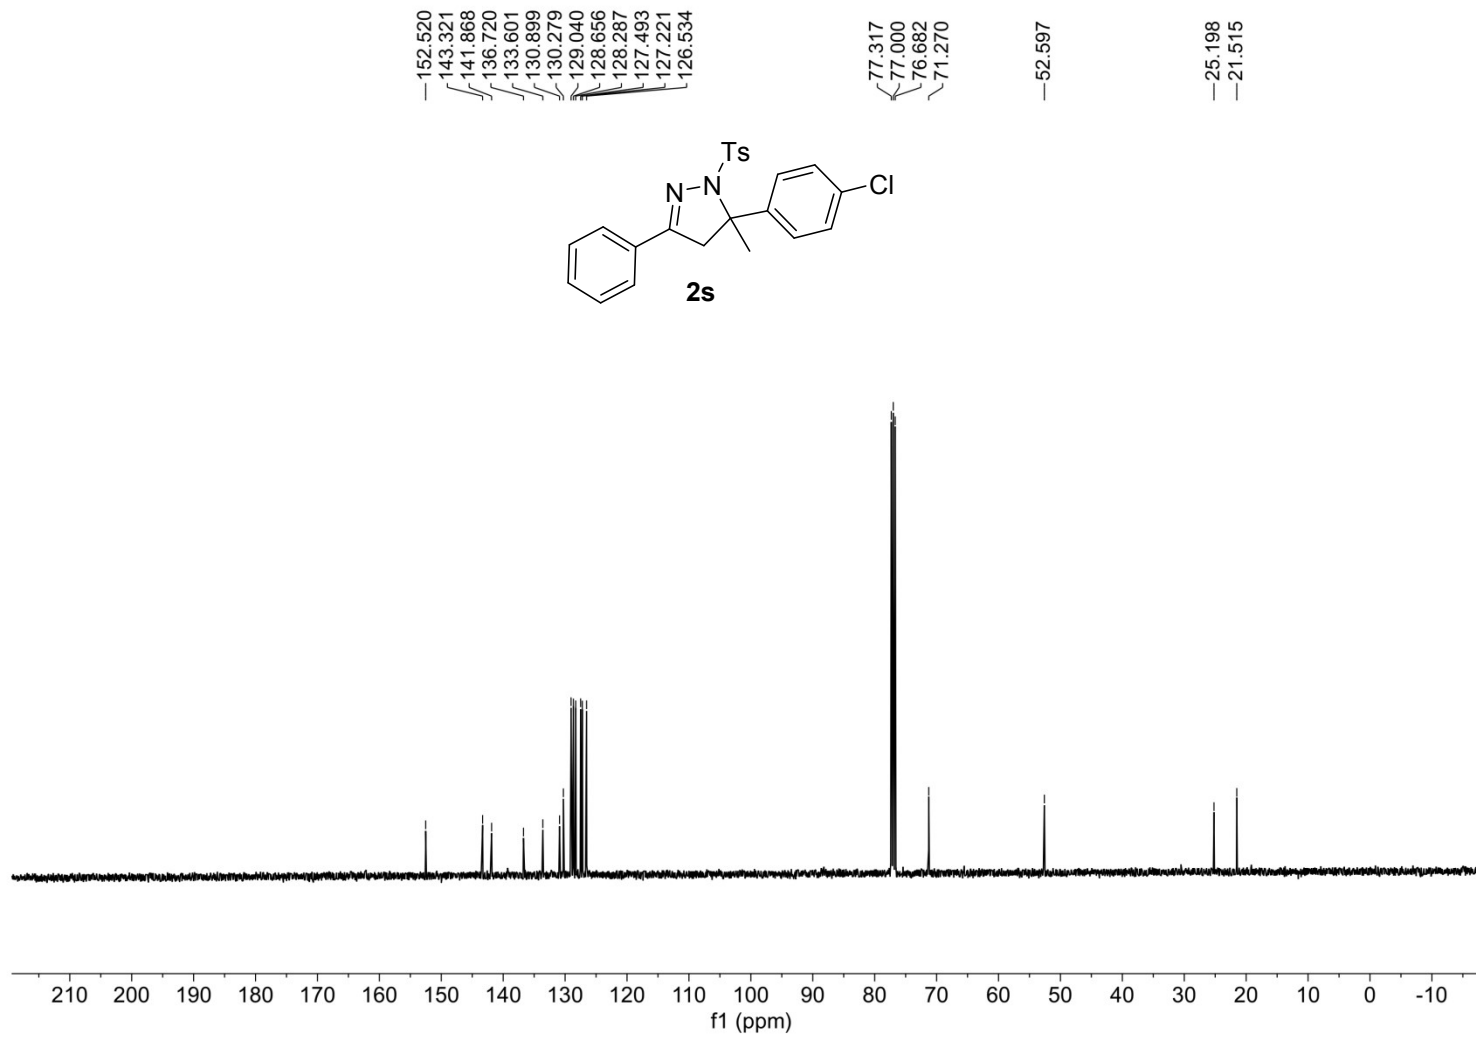

S57

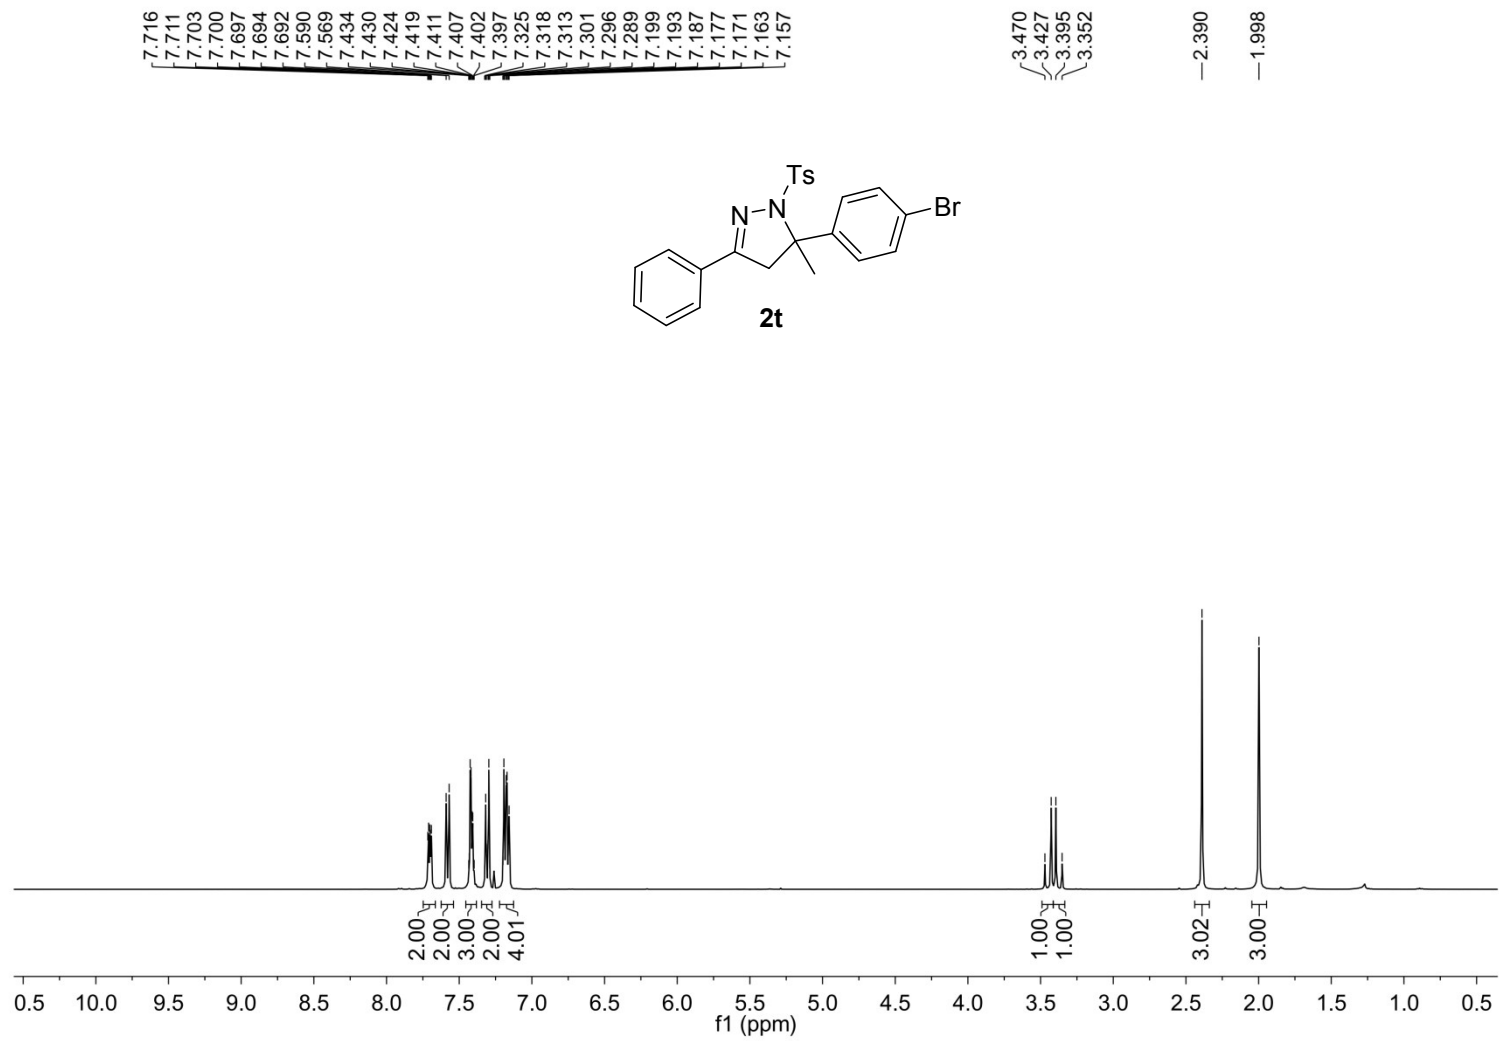

S58

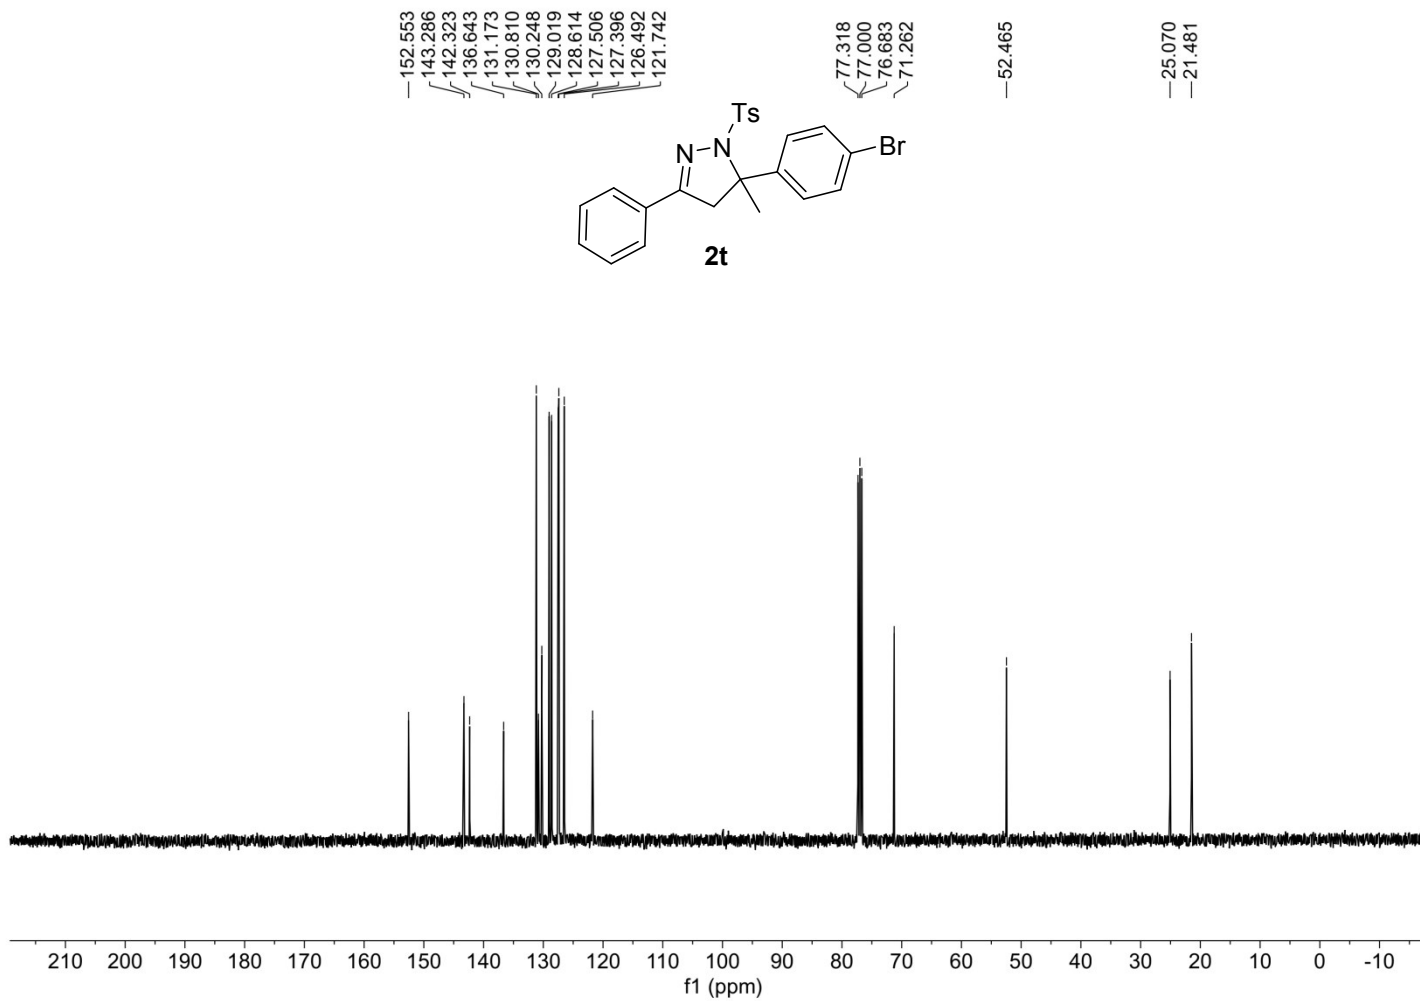

S59

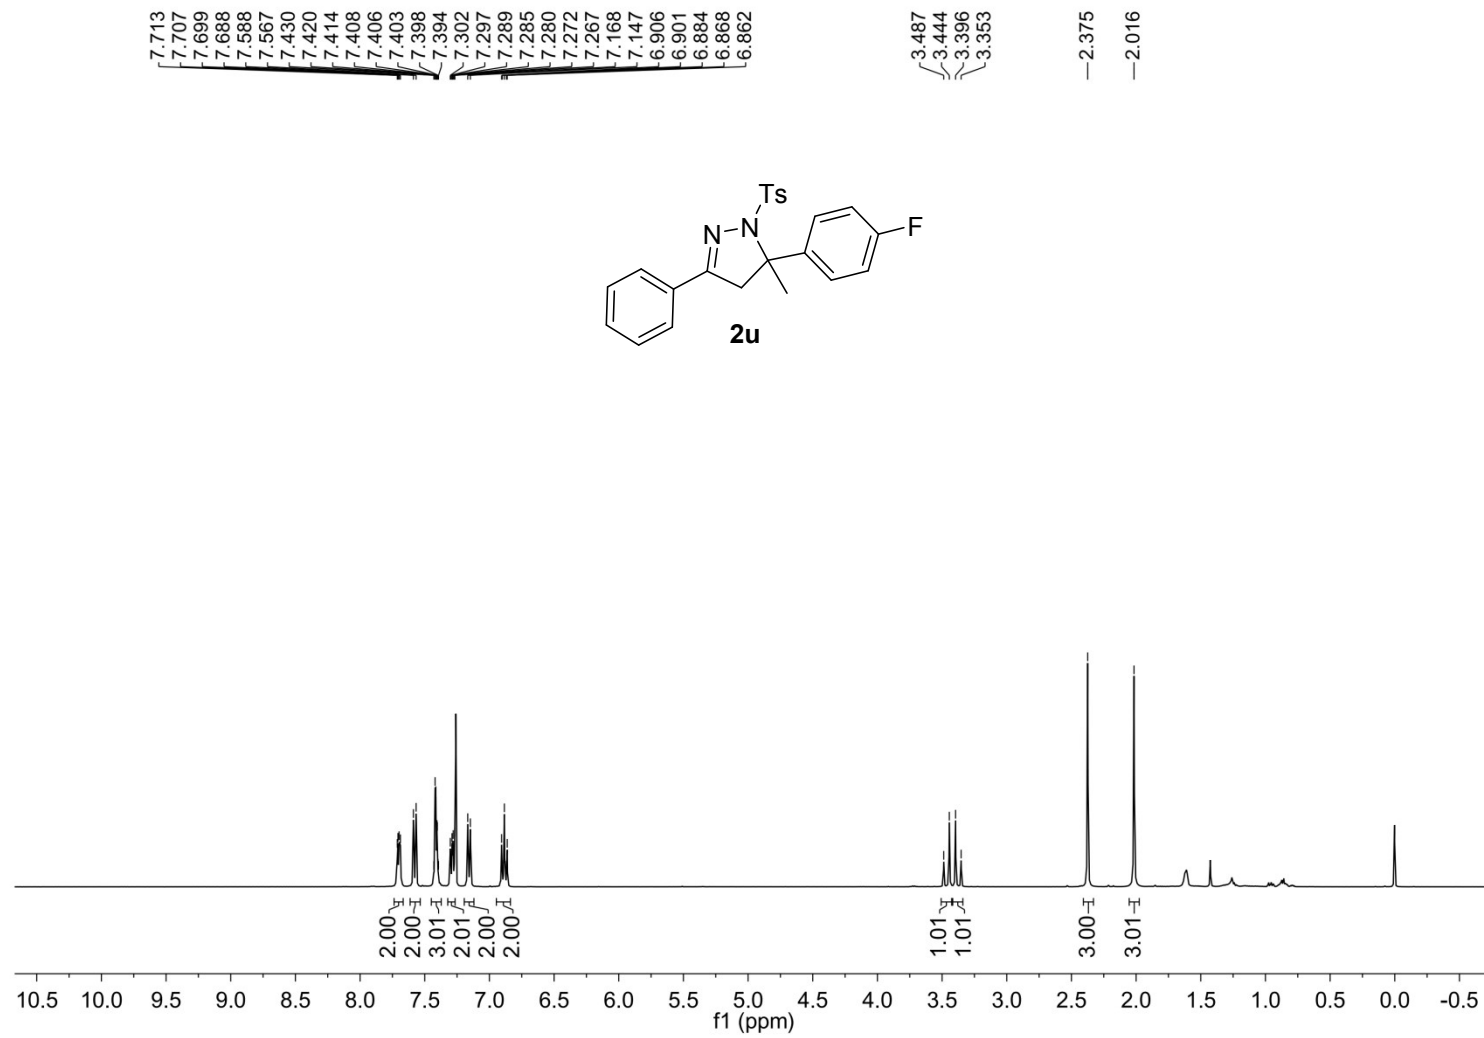

S60

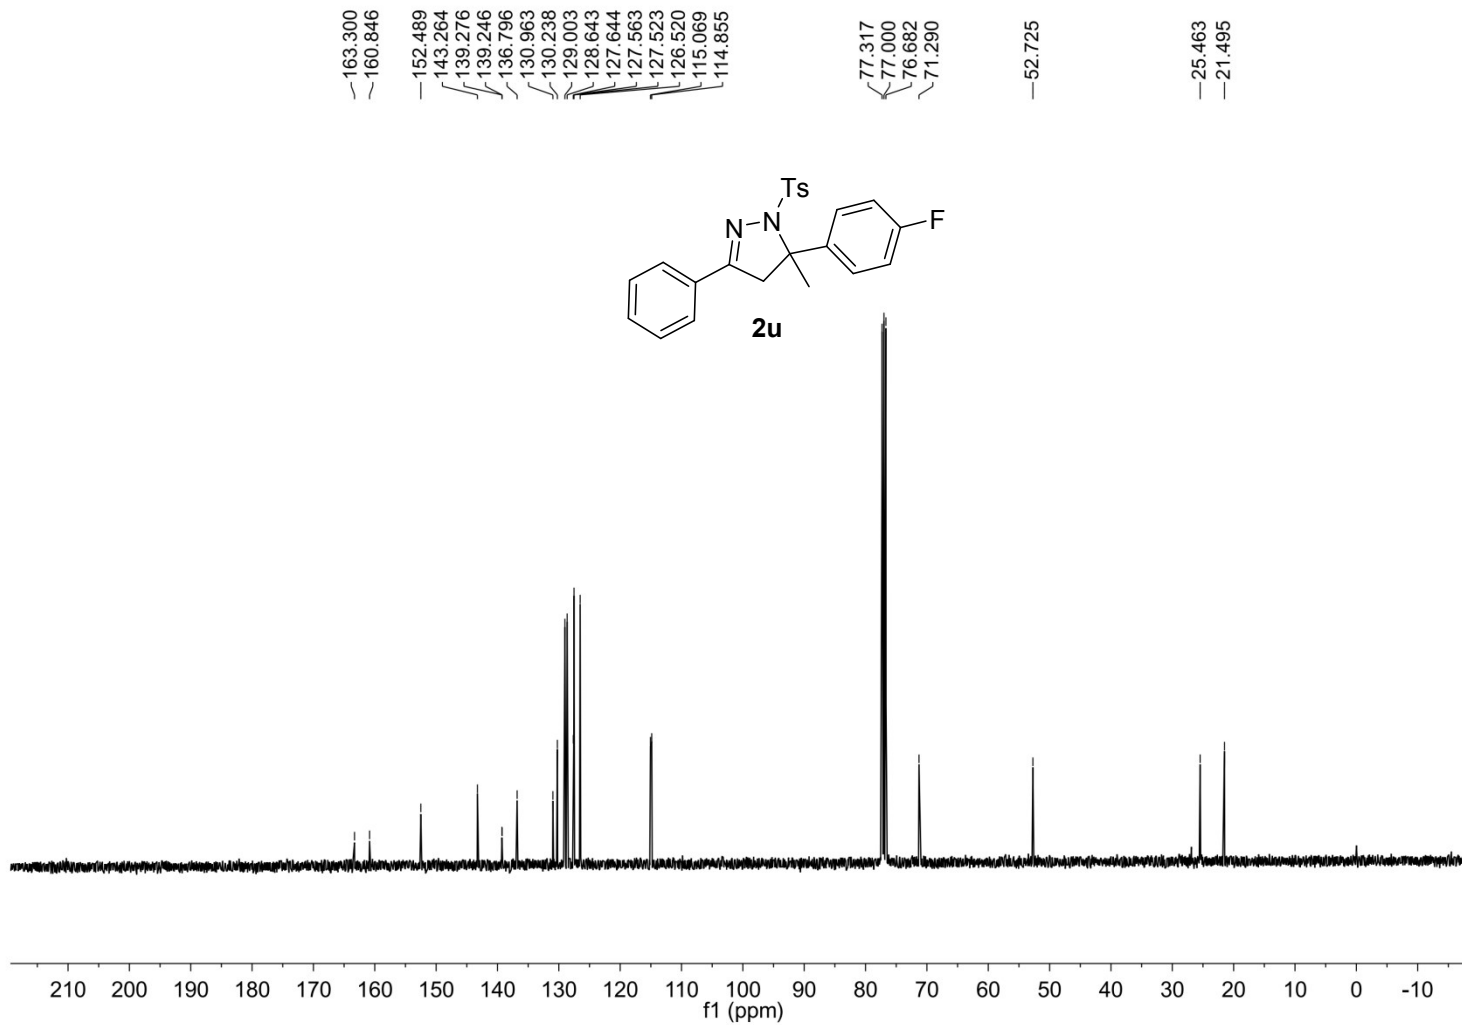

S61

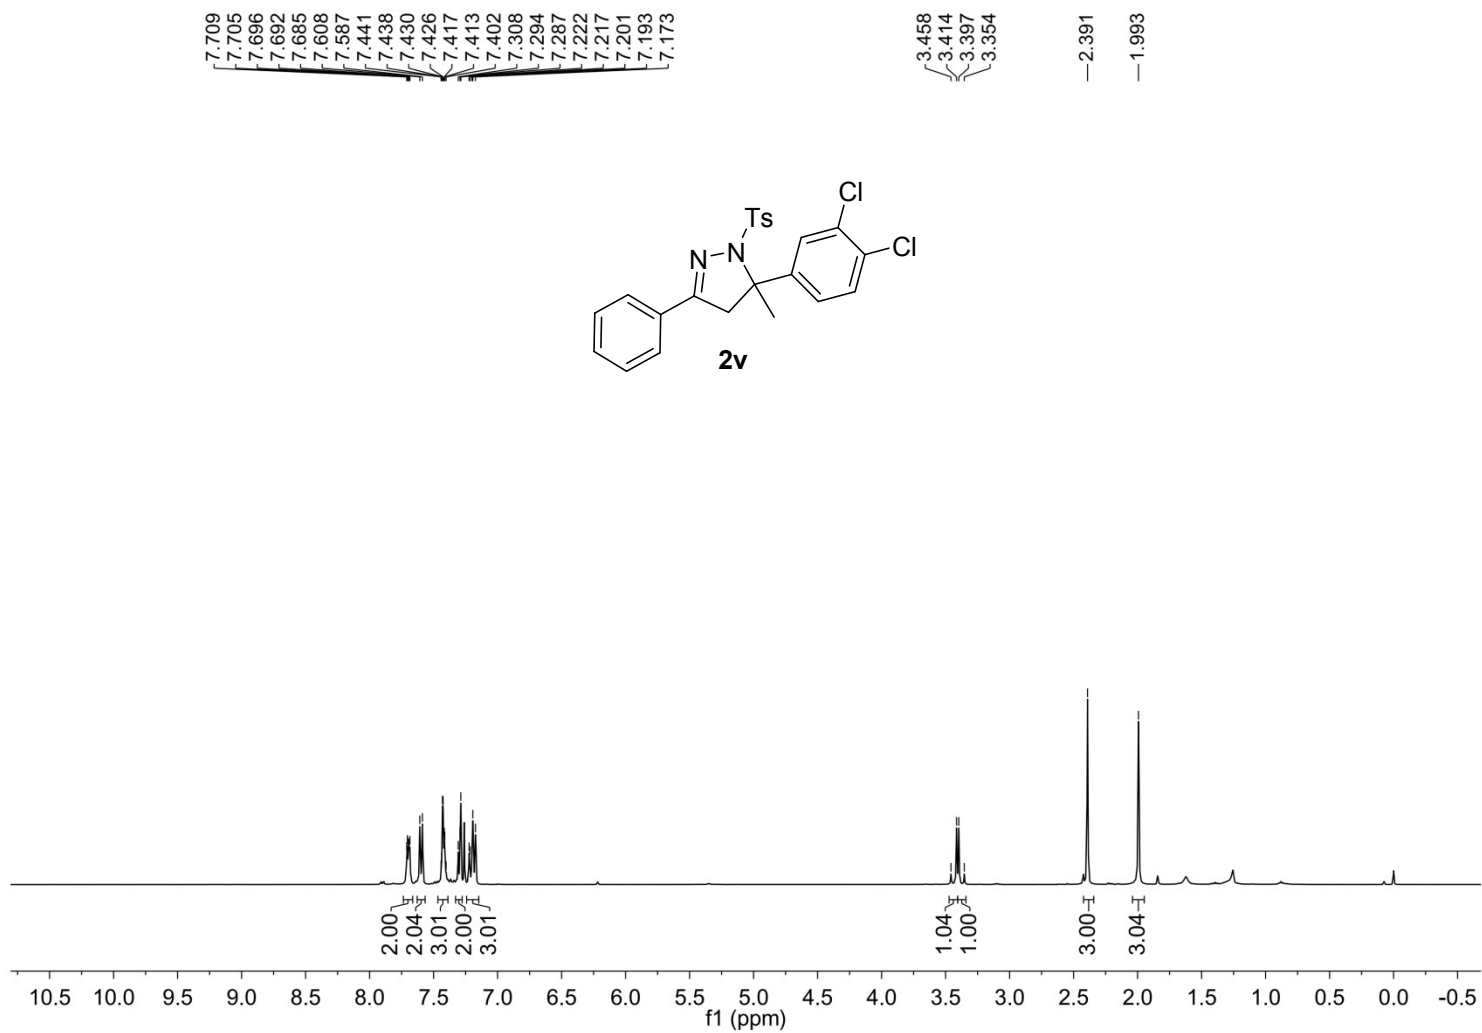

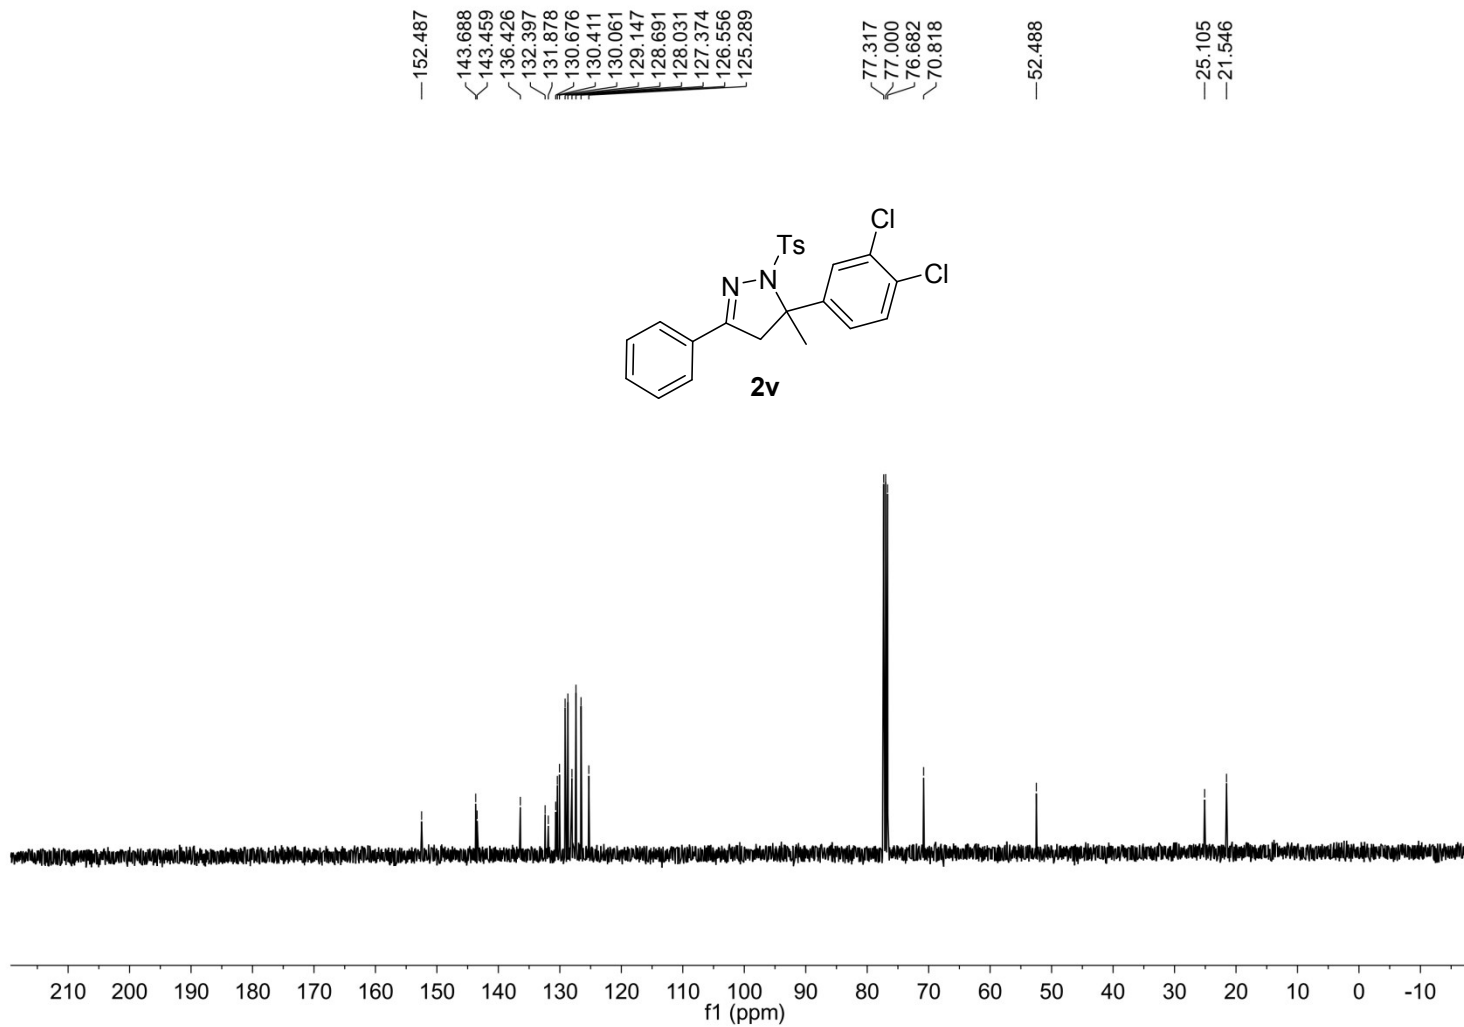

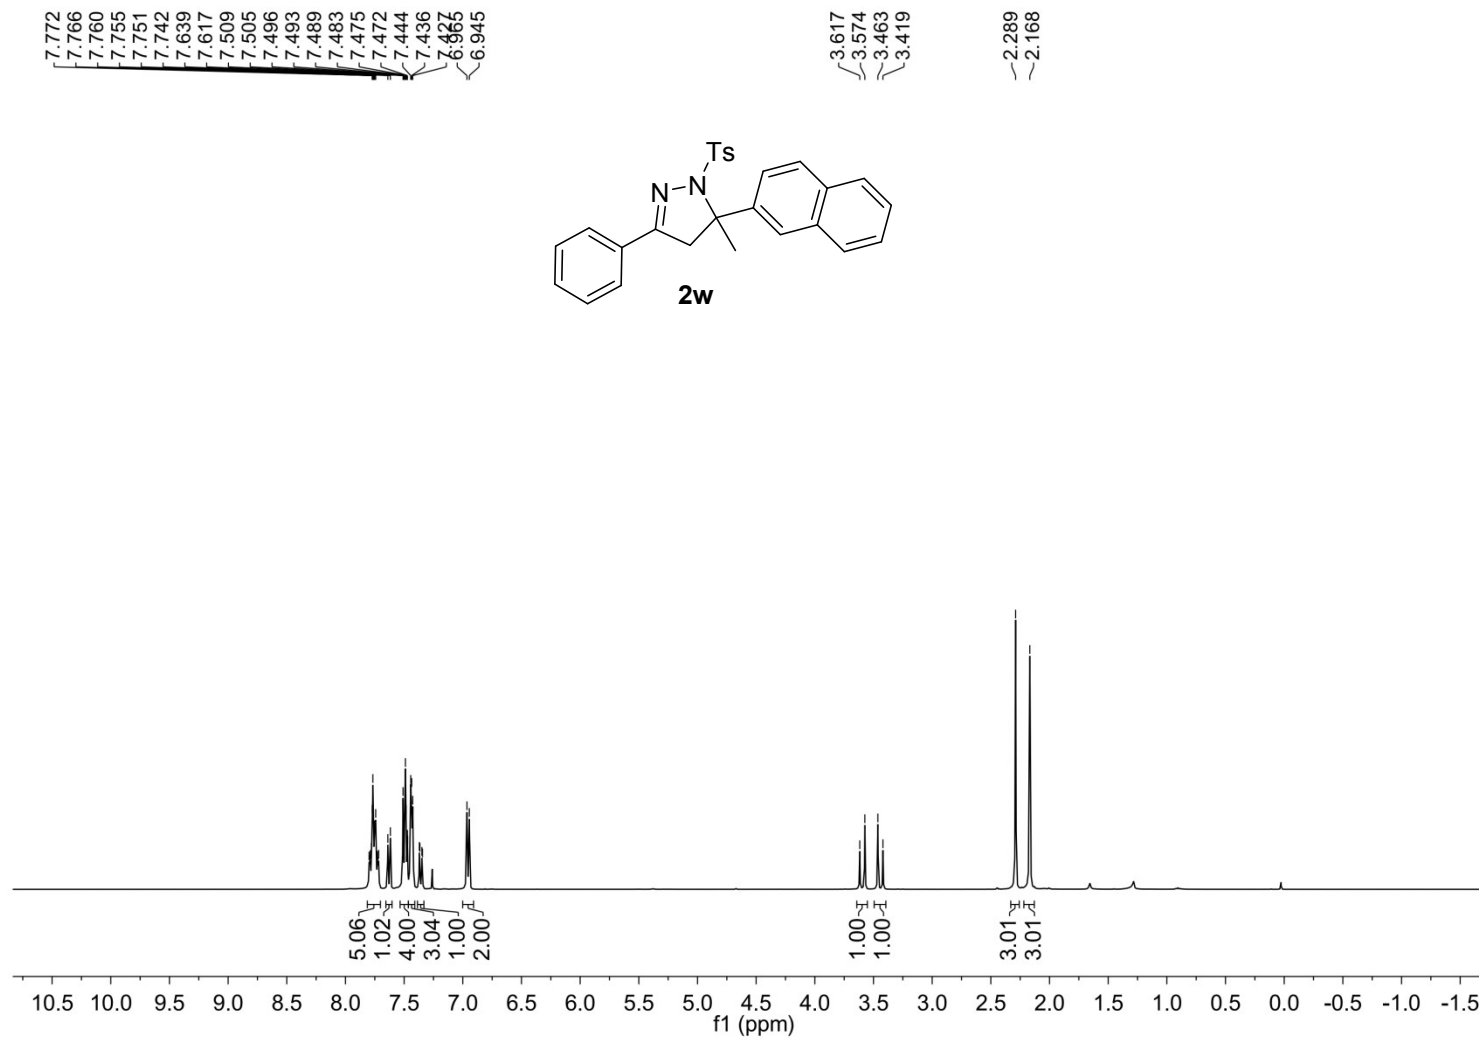

S64



152.587  
142.971  
140.195  
136.715  
132.684  
132.582  
131.065  
130.137  
128.779  
128.599  
128.319  
128.025  
127.368  
127.251  
126.539  
126.217  
126.101  
124.602  
123.850

77.318  
77.000  
76.683  
71.812

52.621

25.405  
21.362

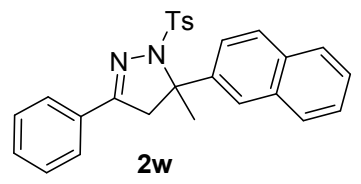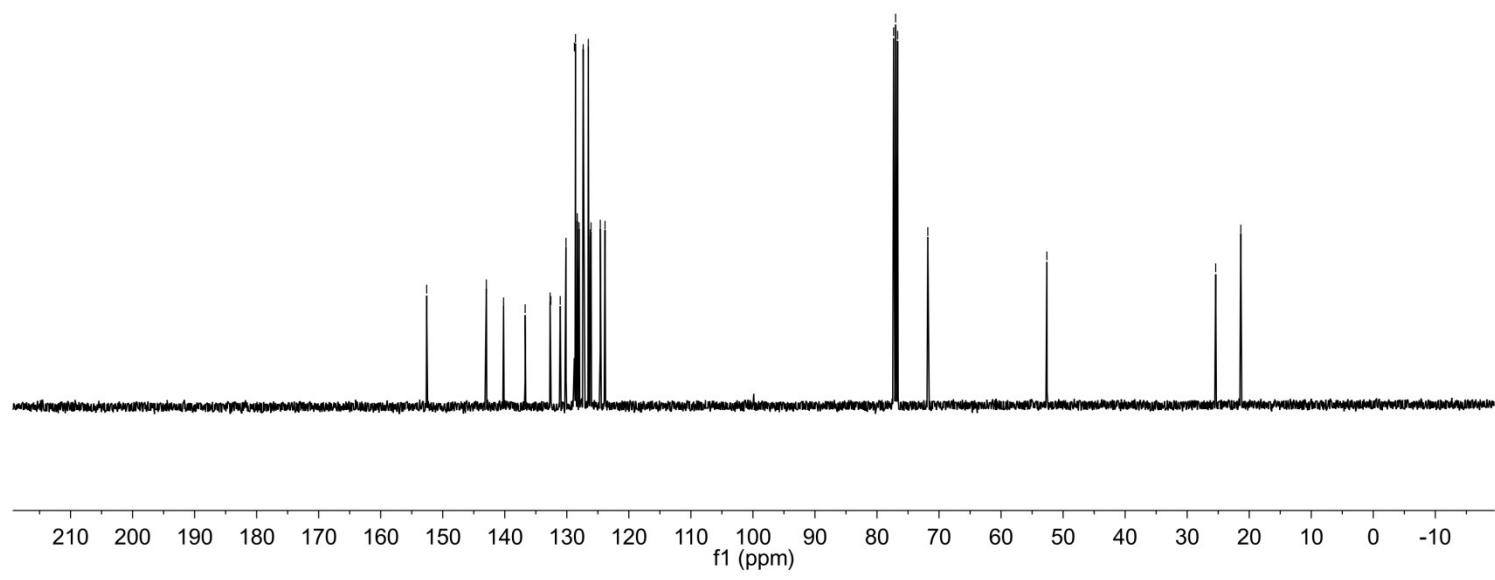

S65

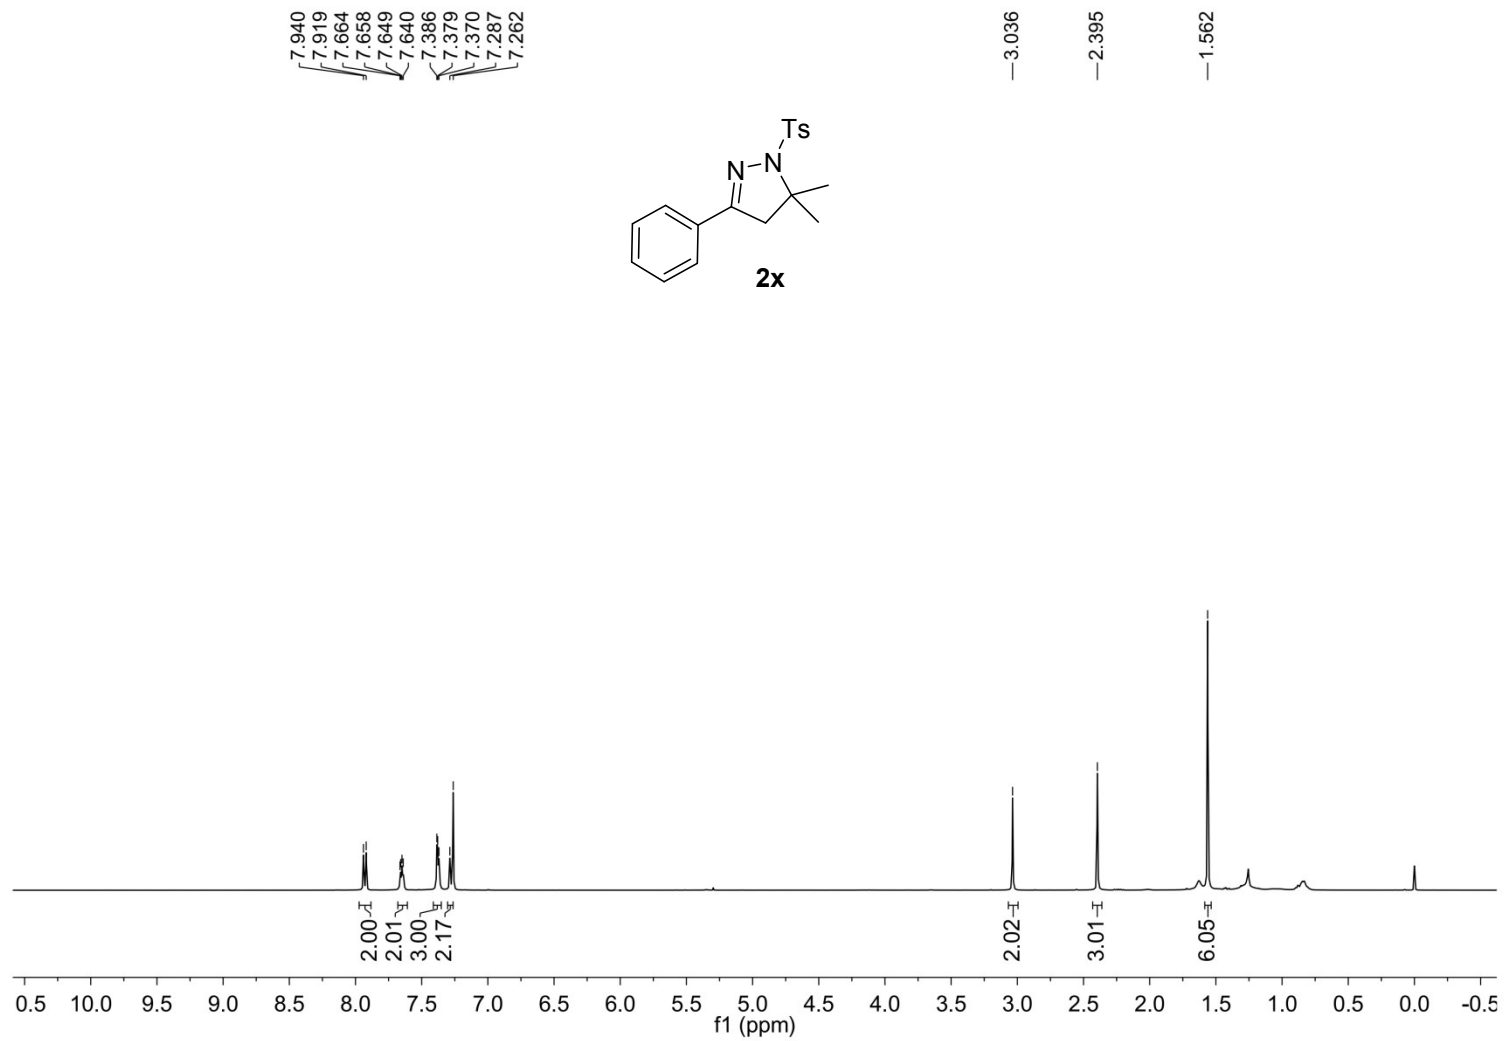

S66

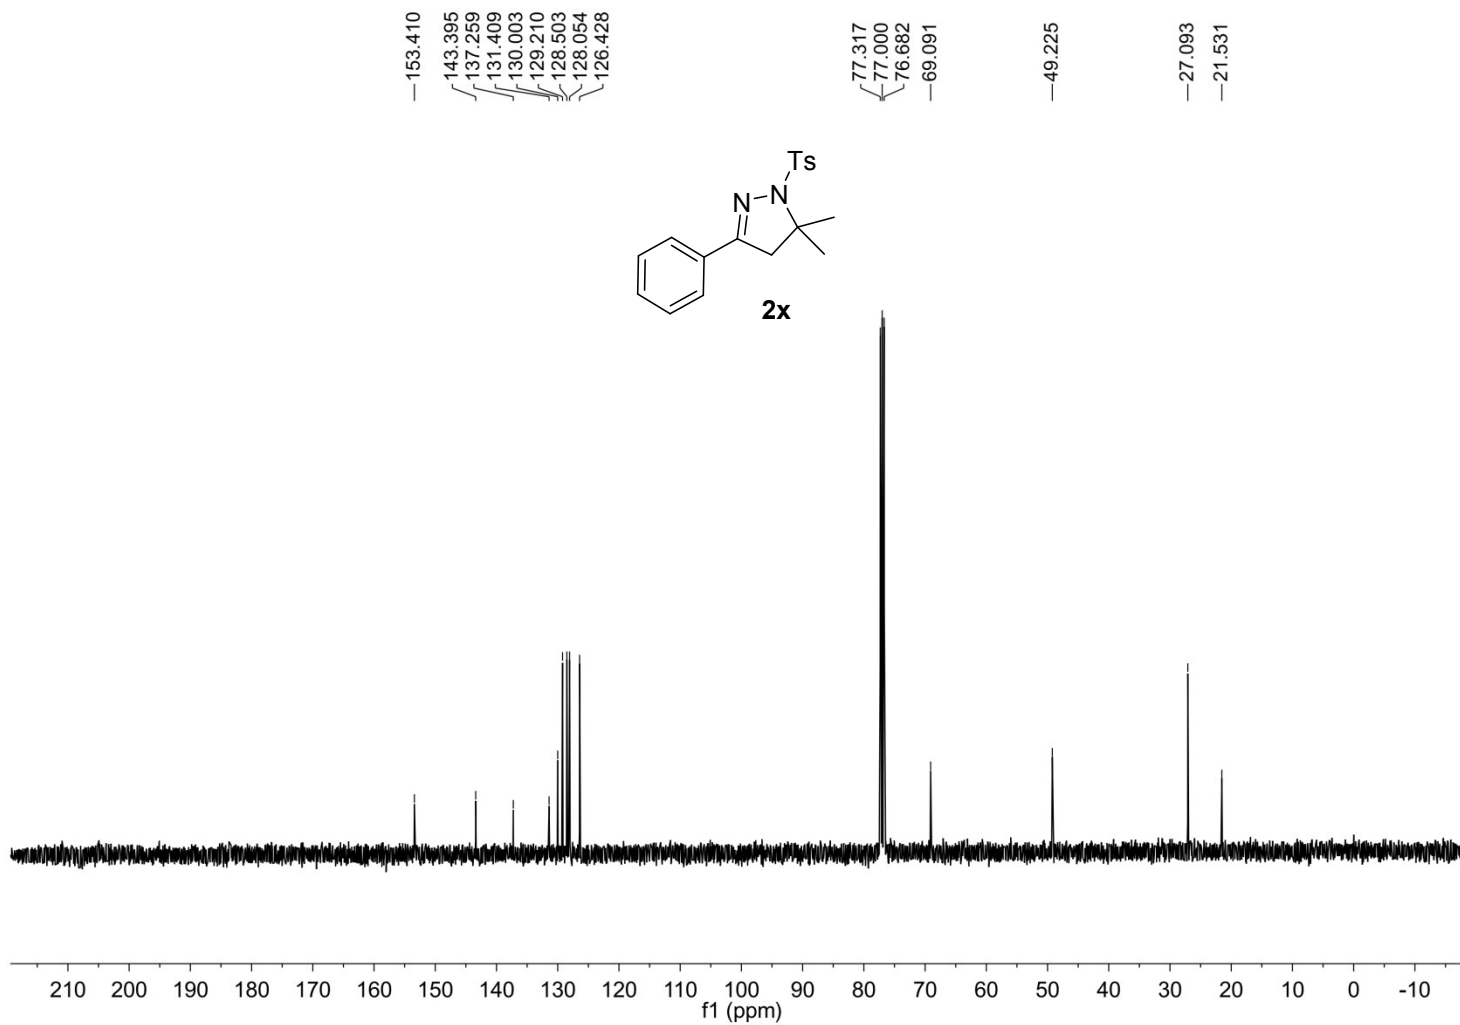

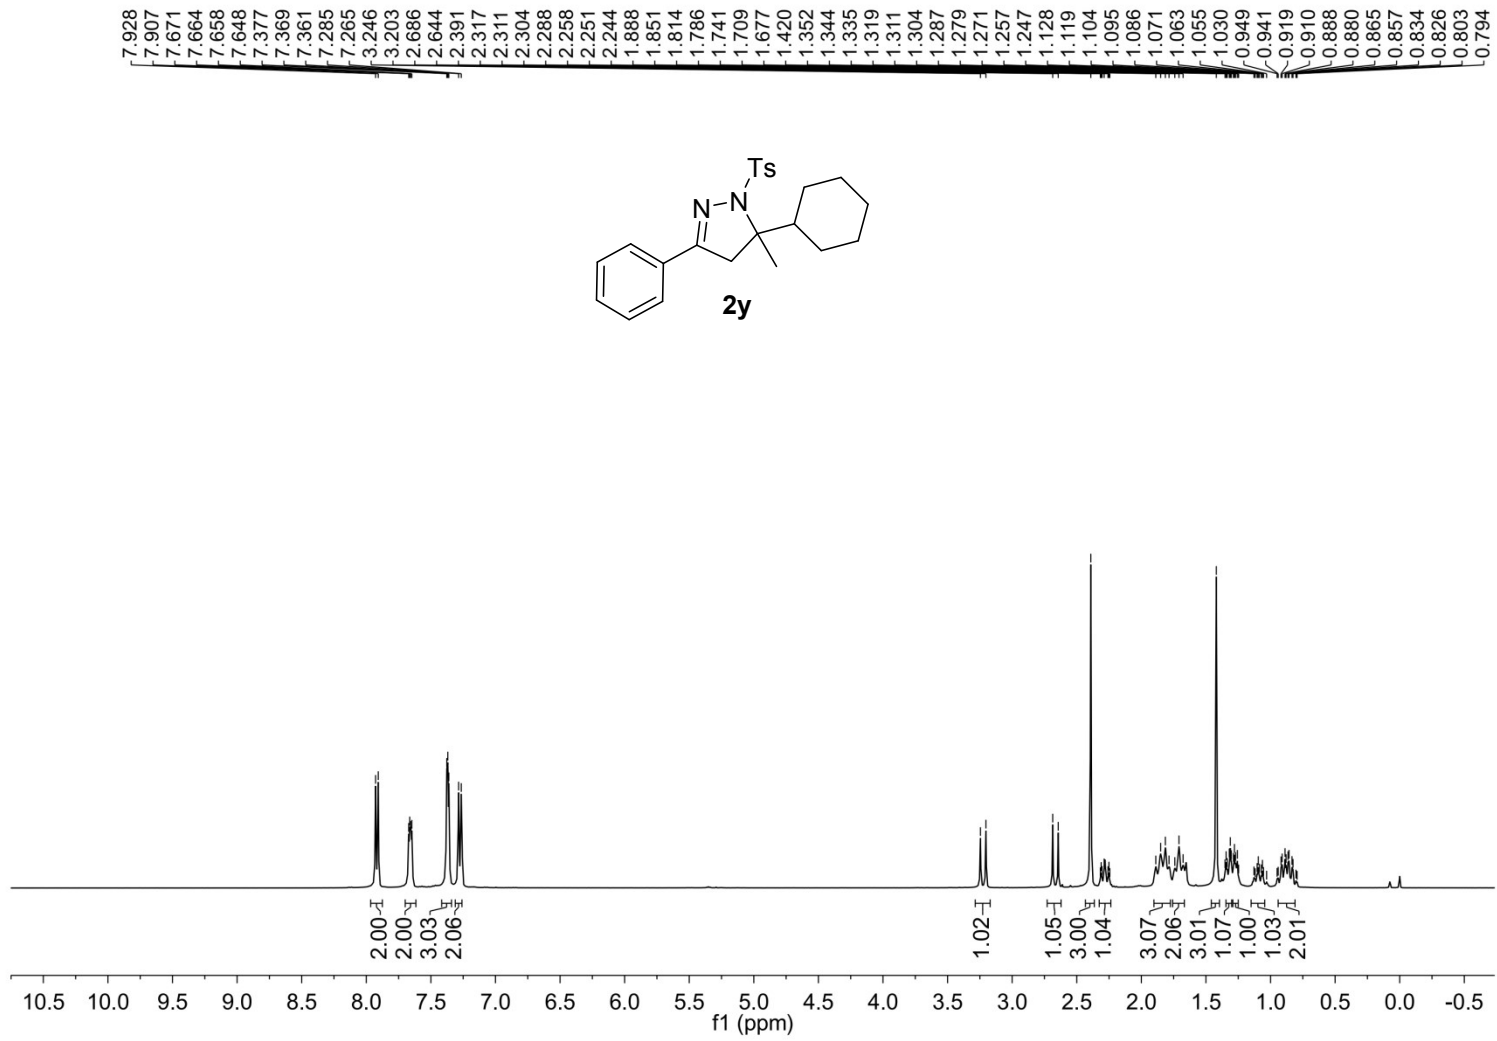

S68

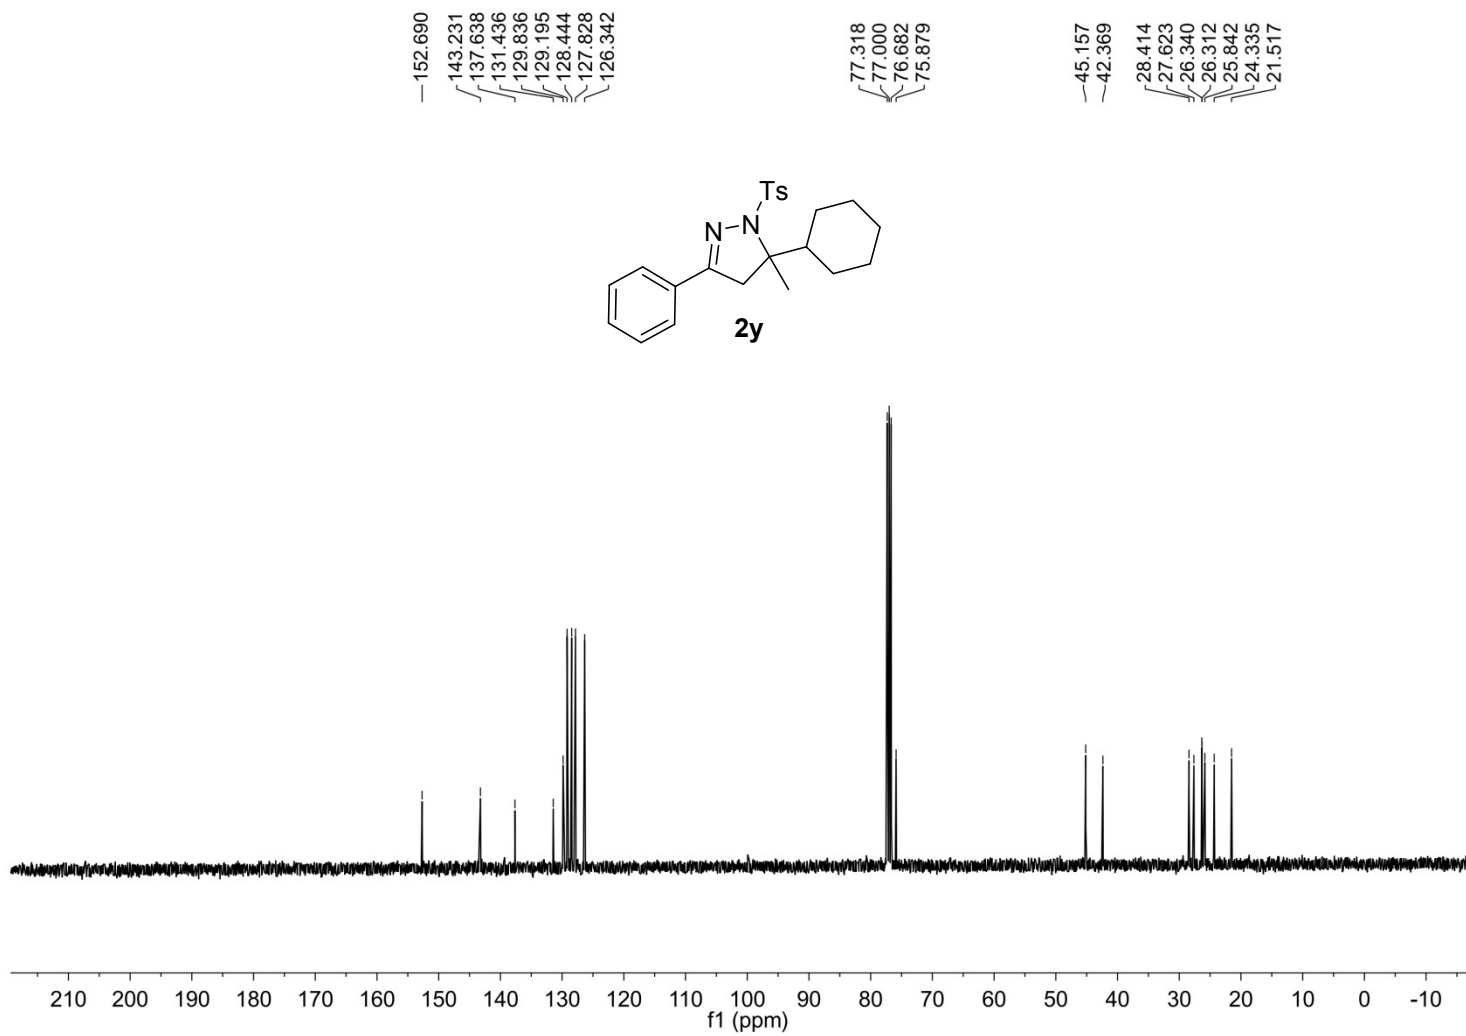

S69

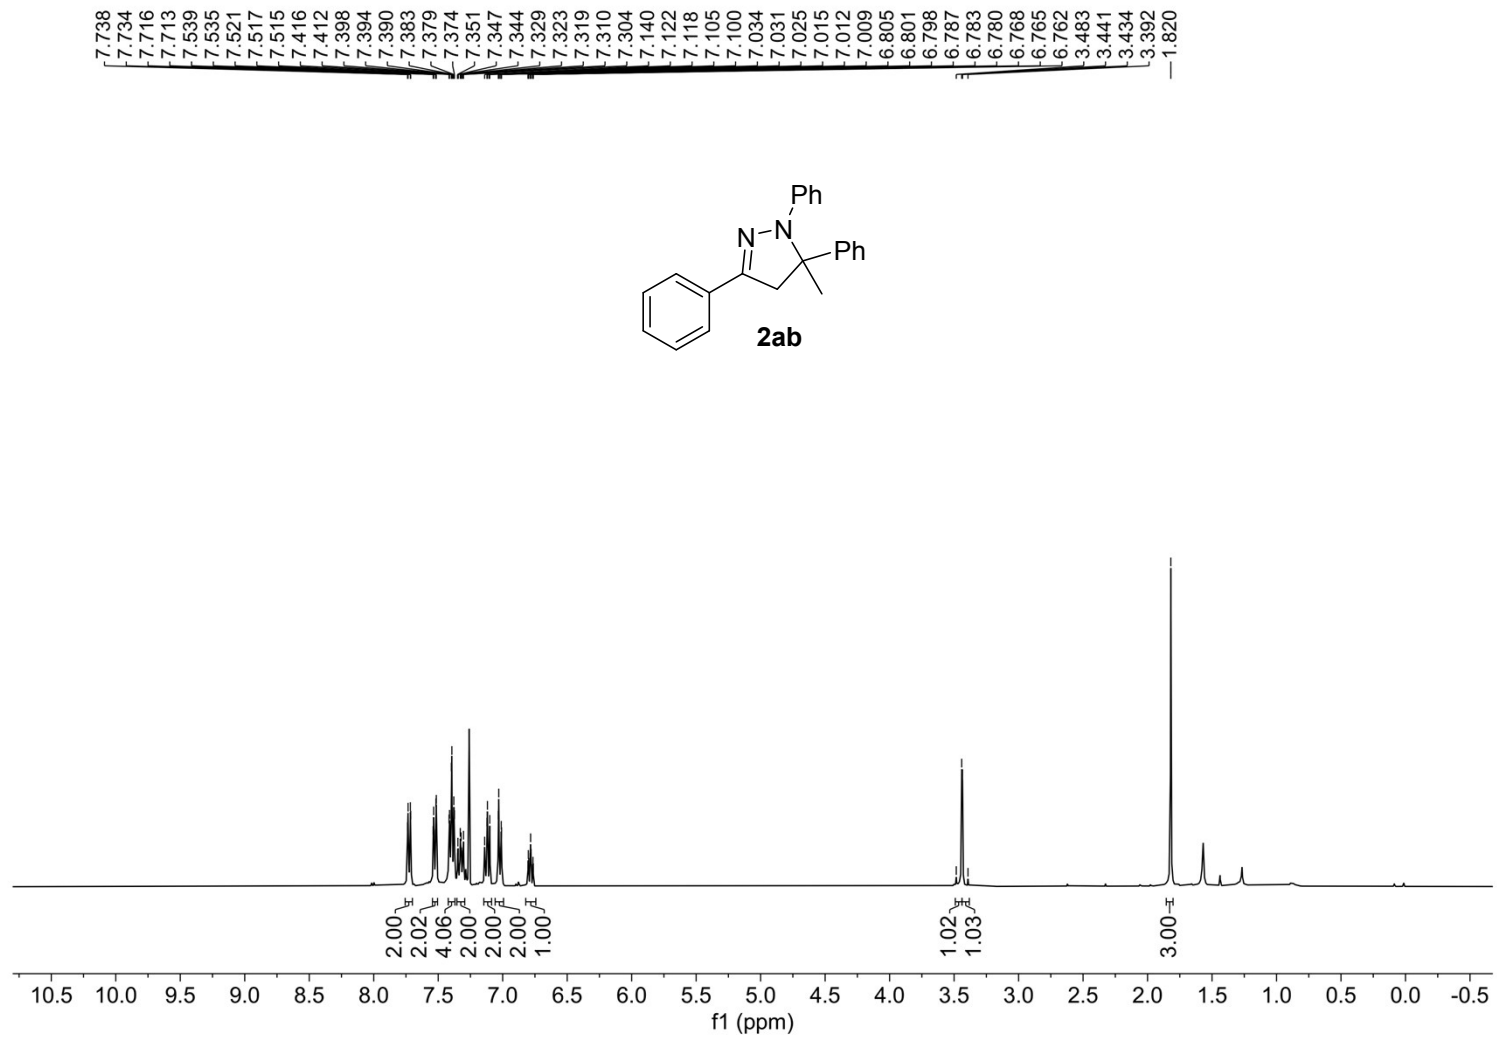

S70

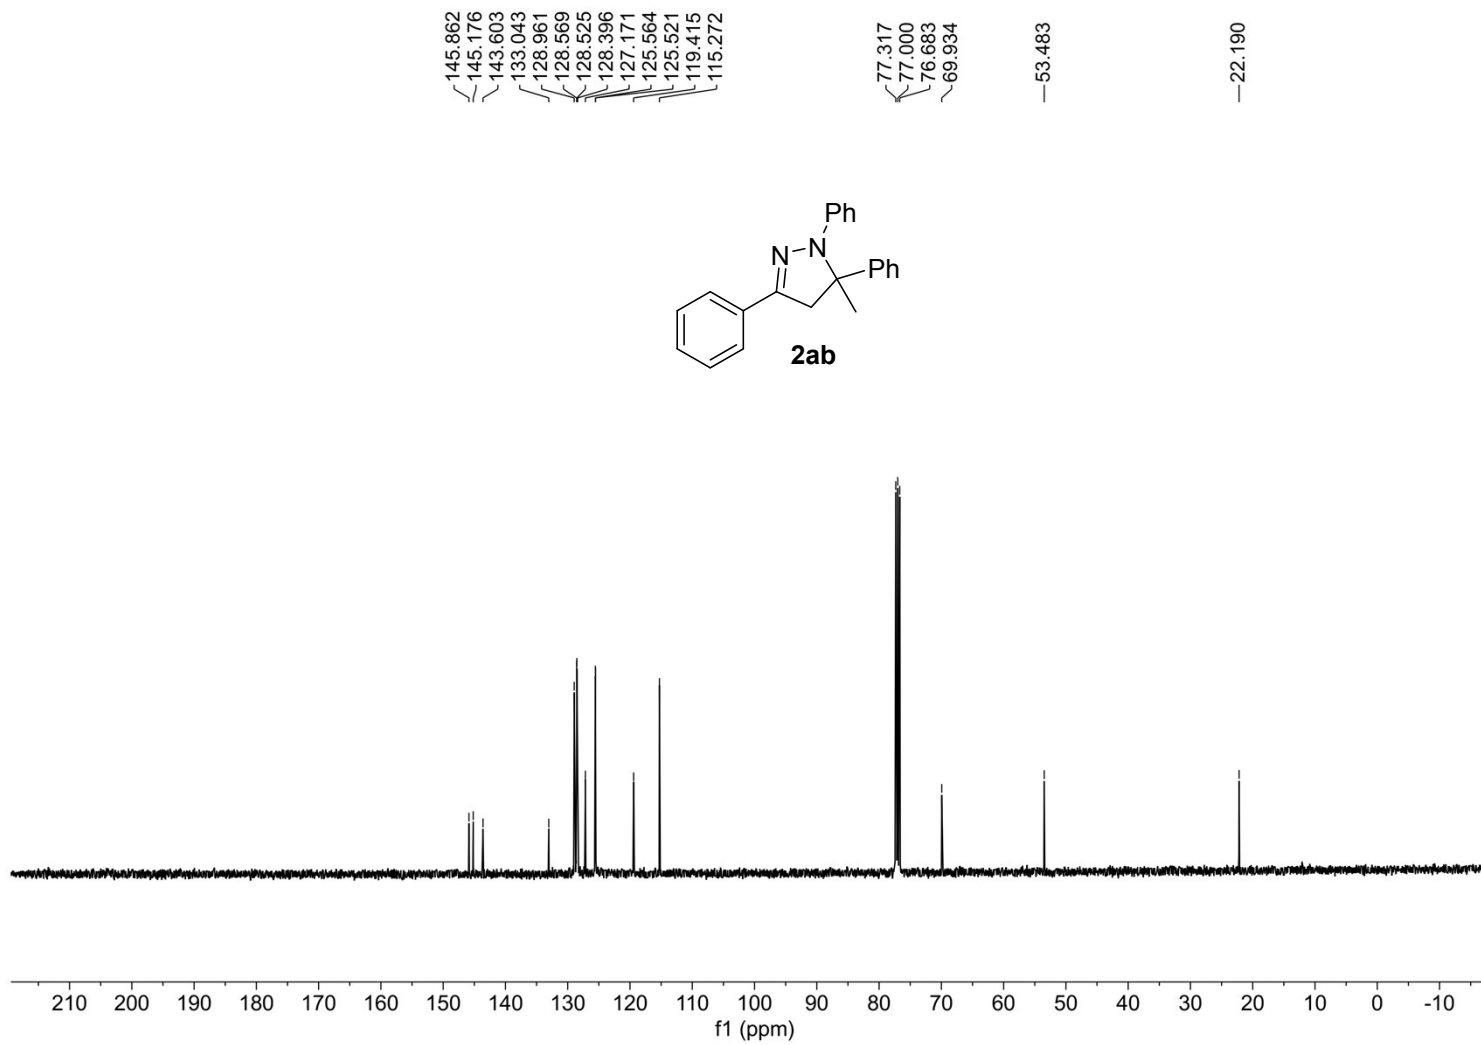

S71

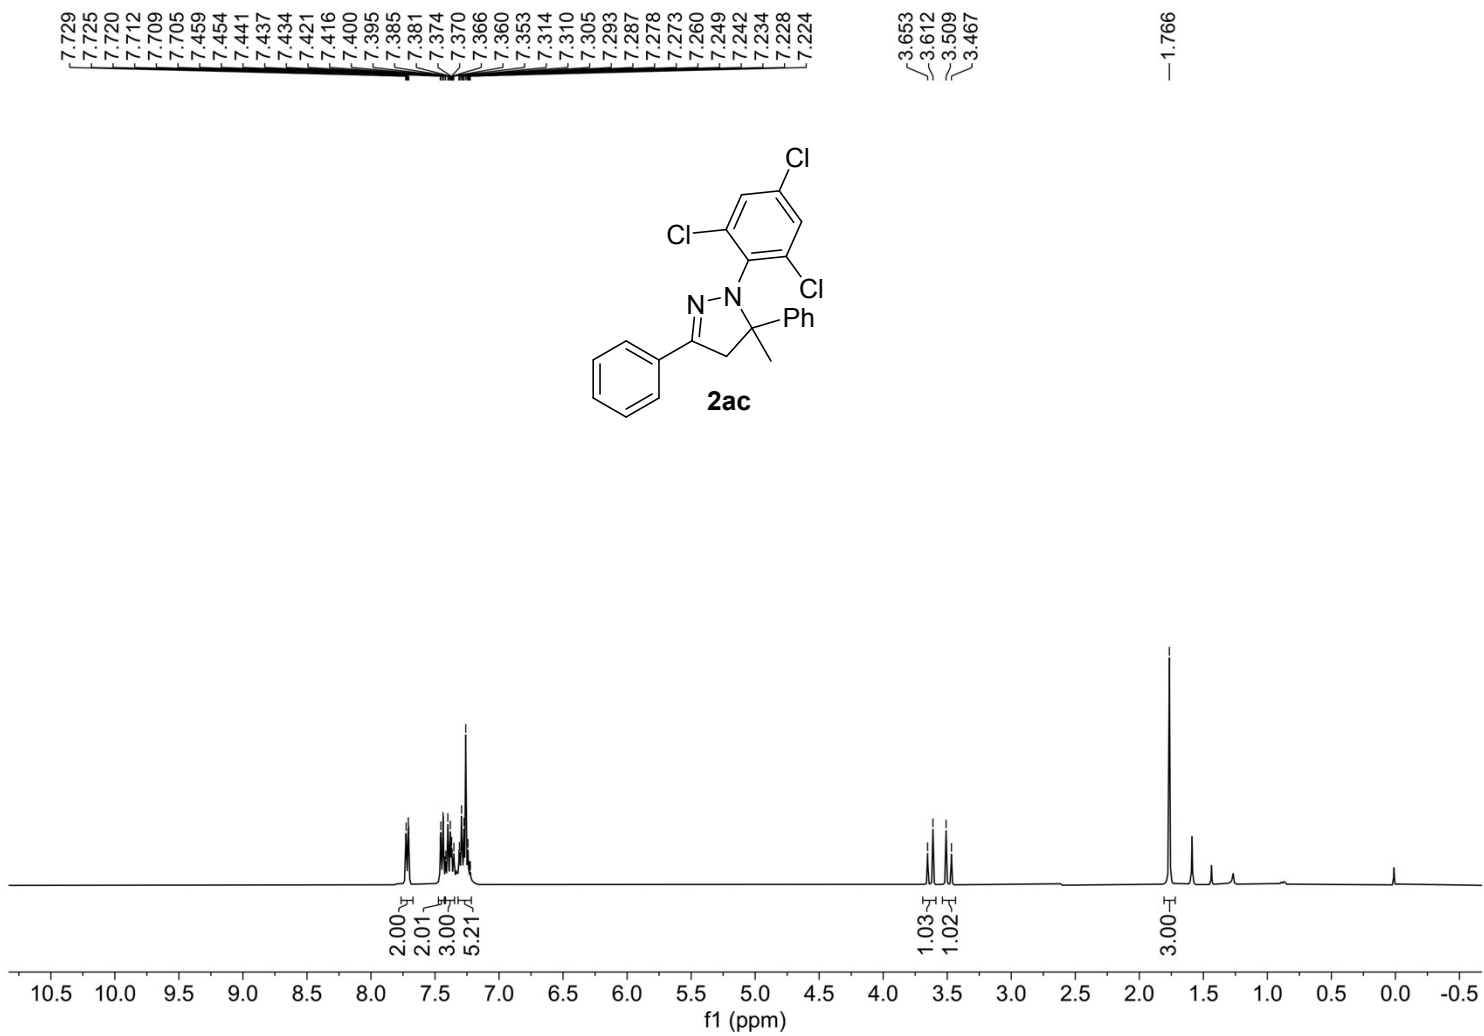

S72



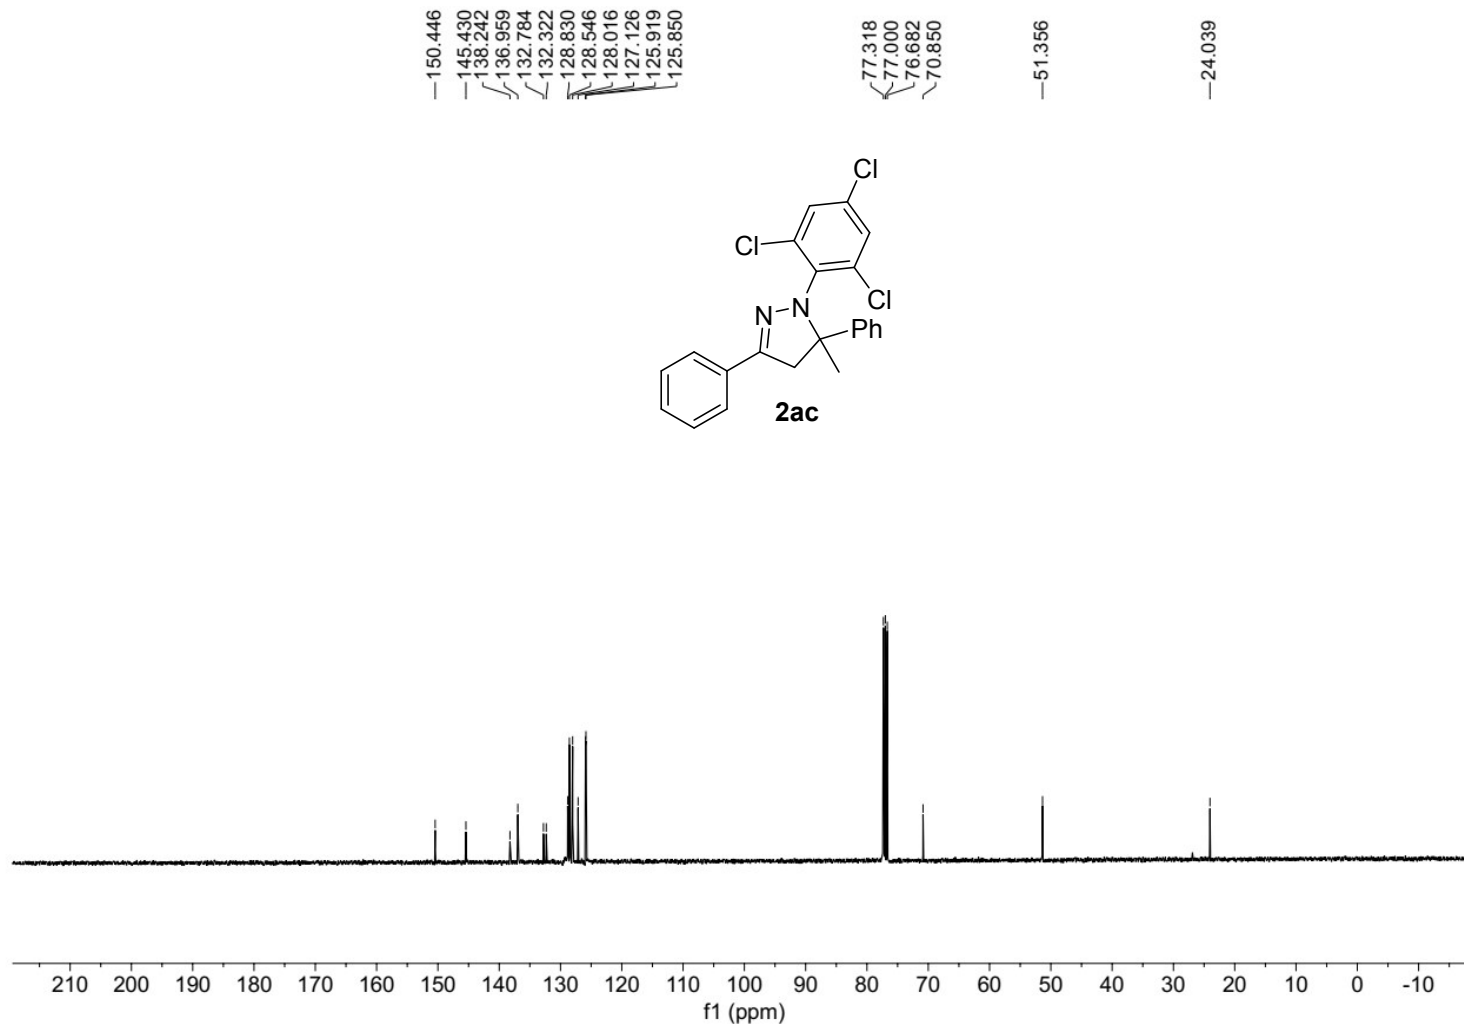

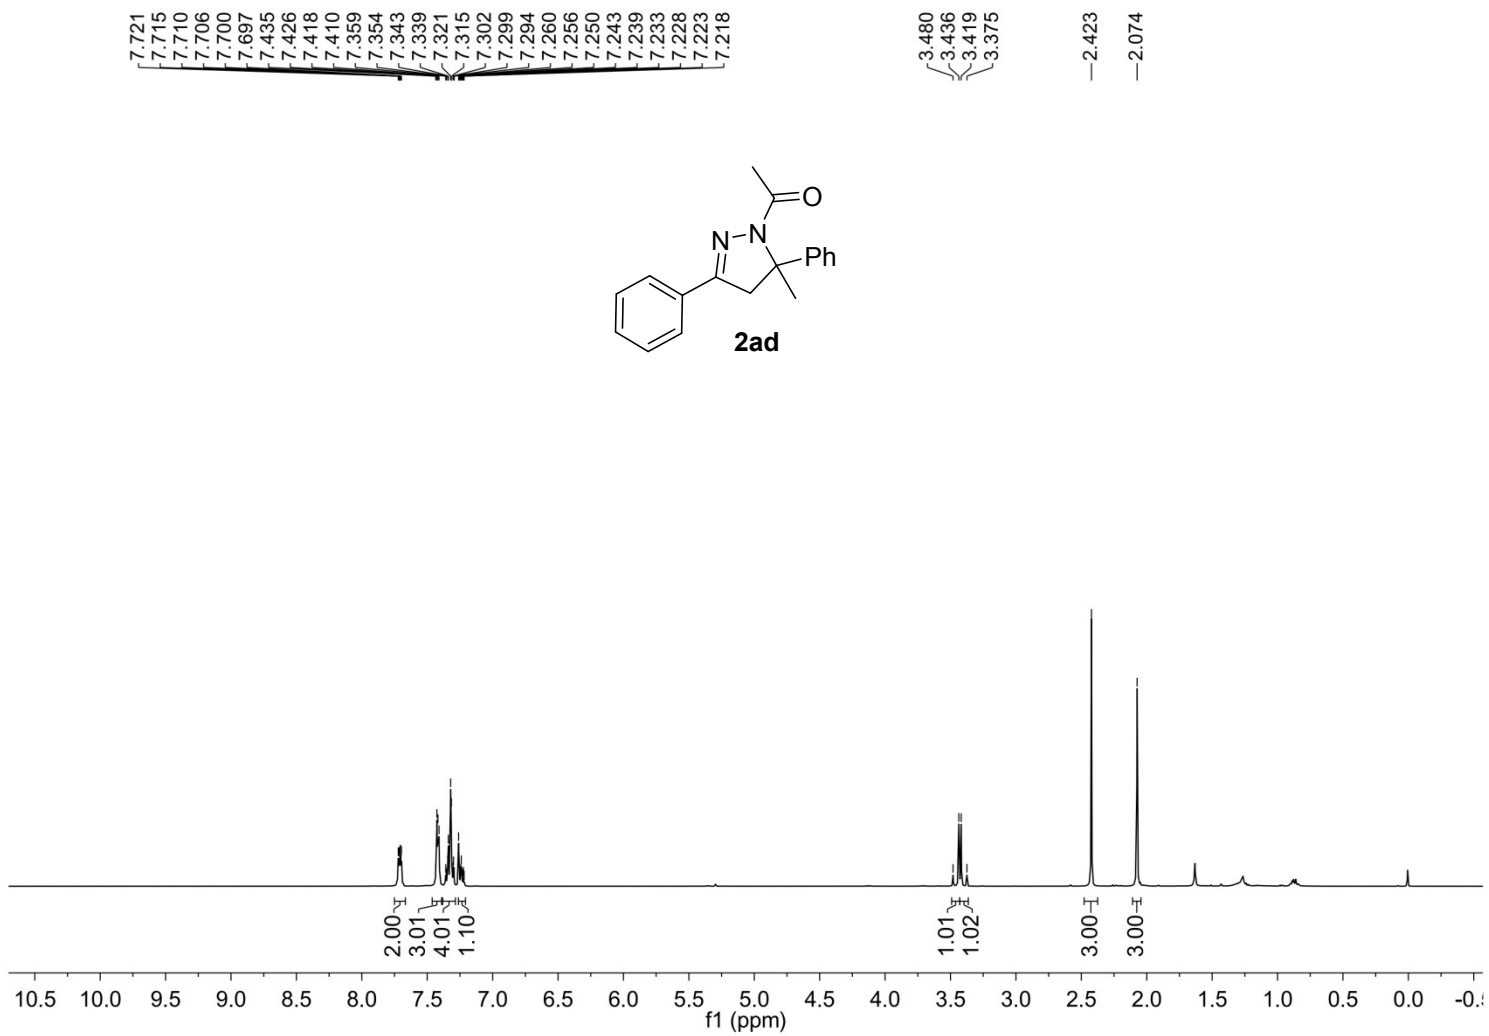

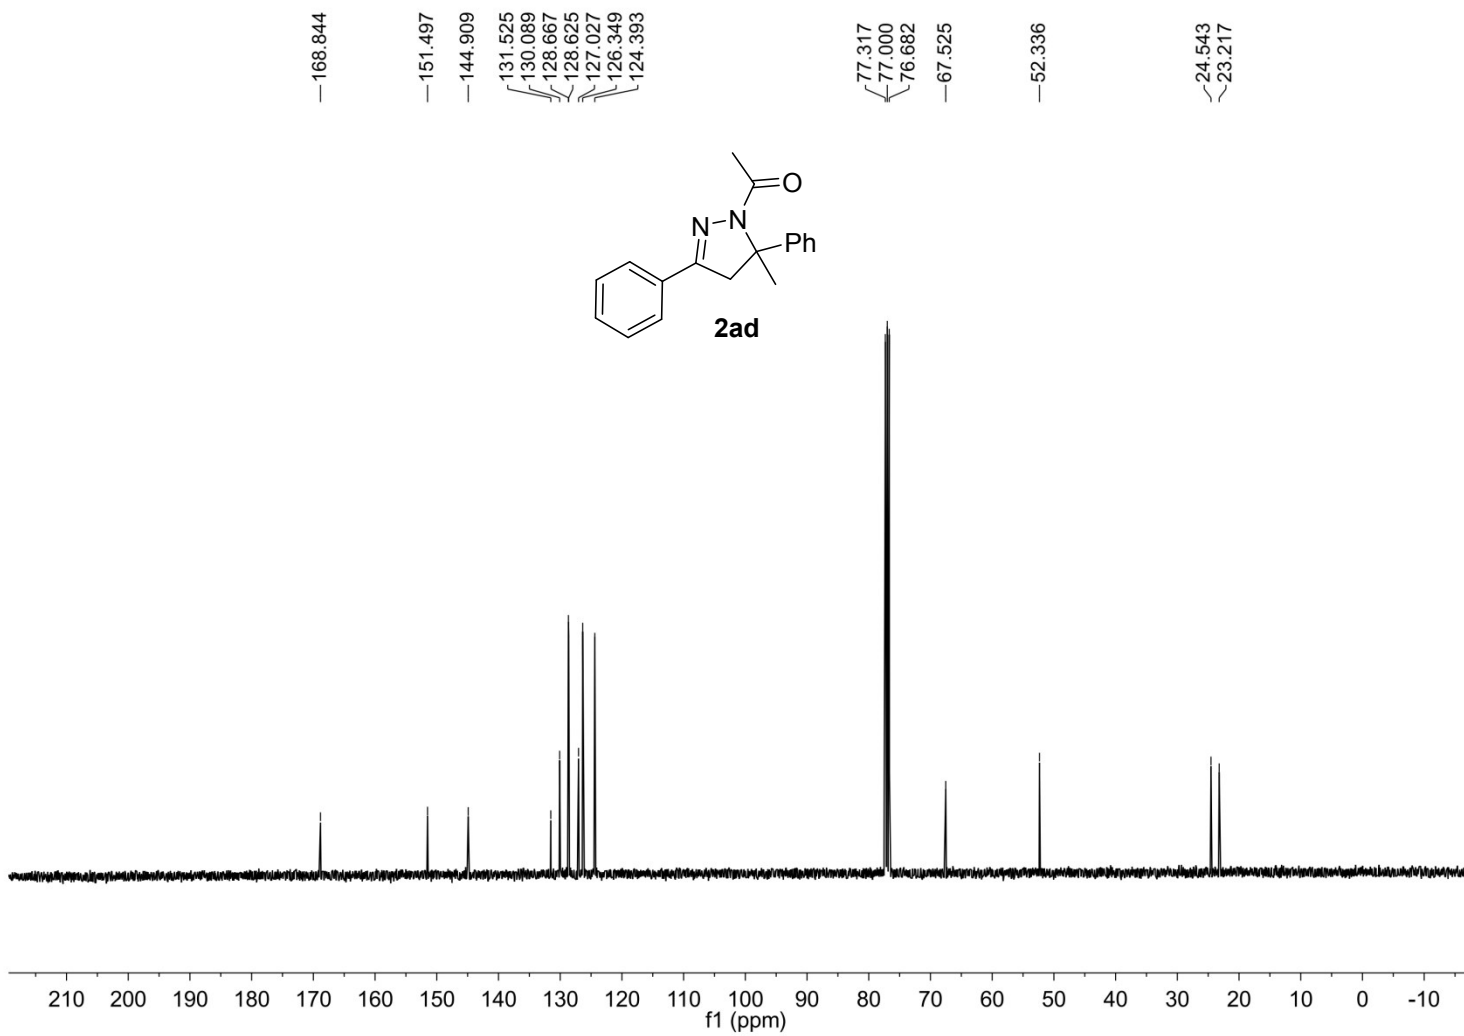

S75

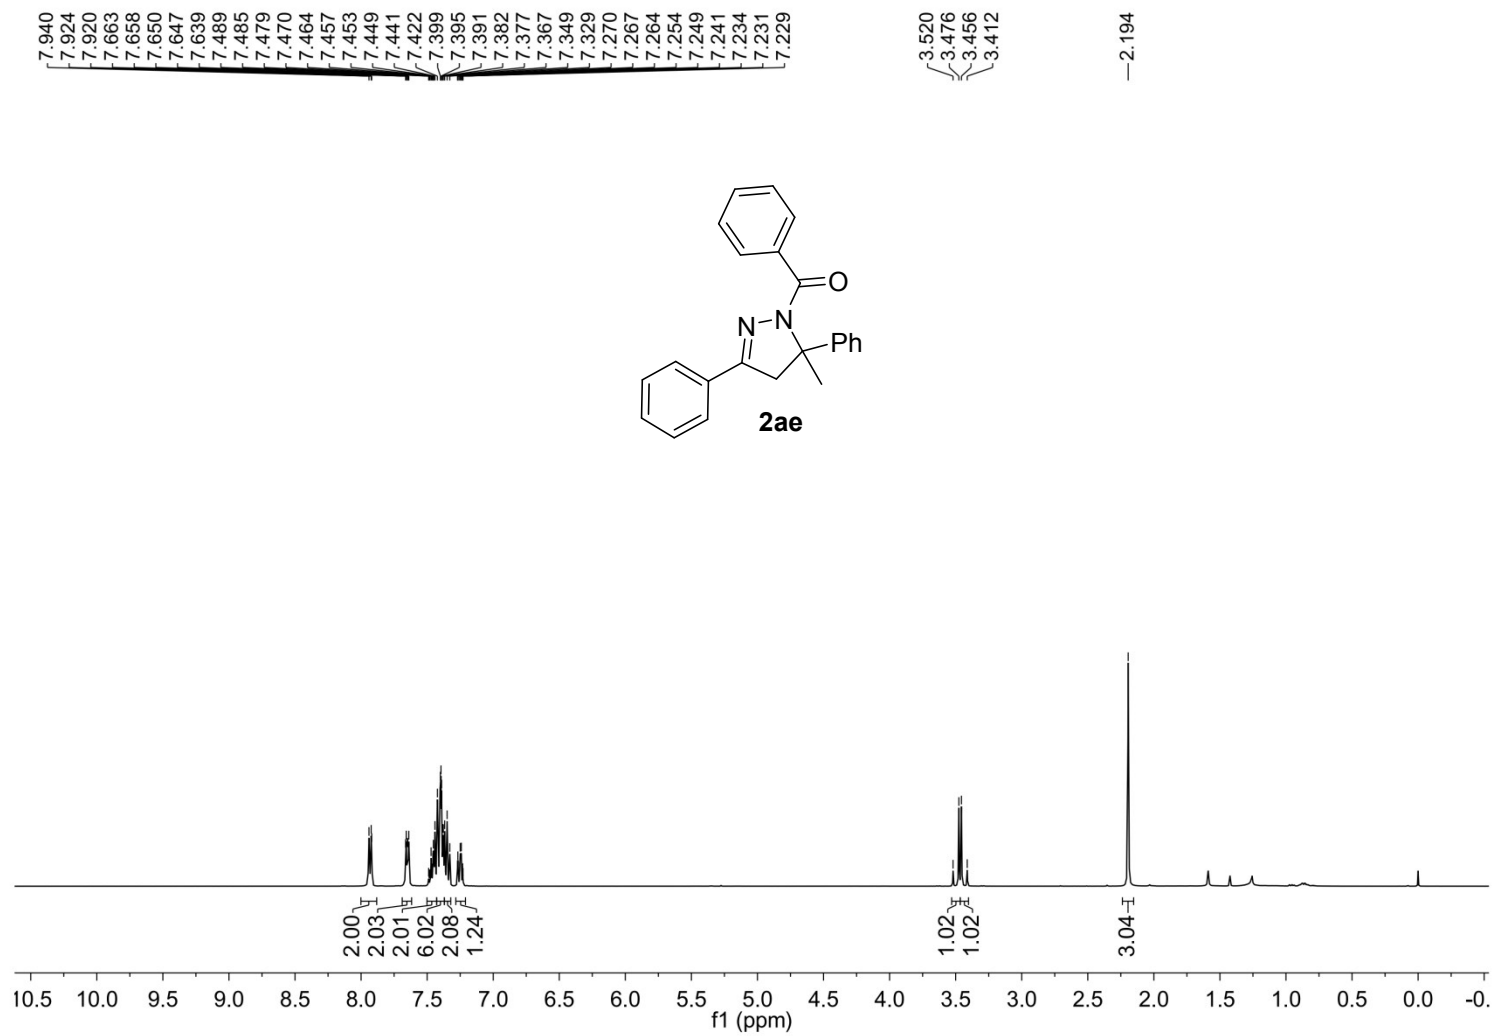

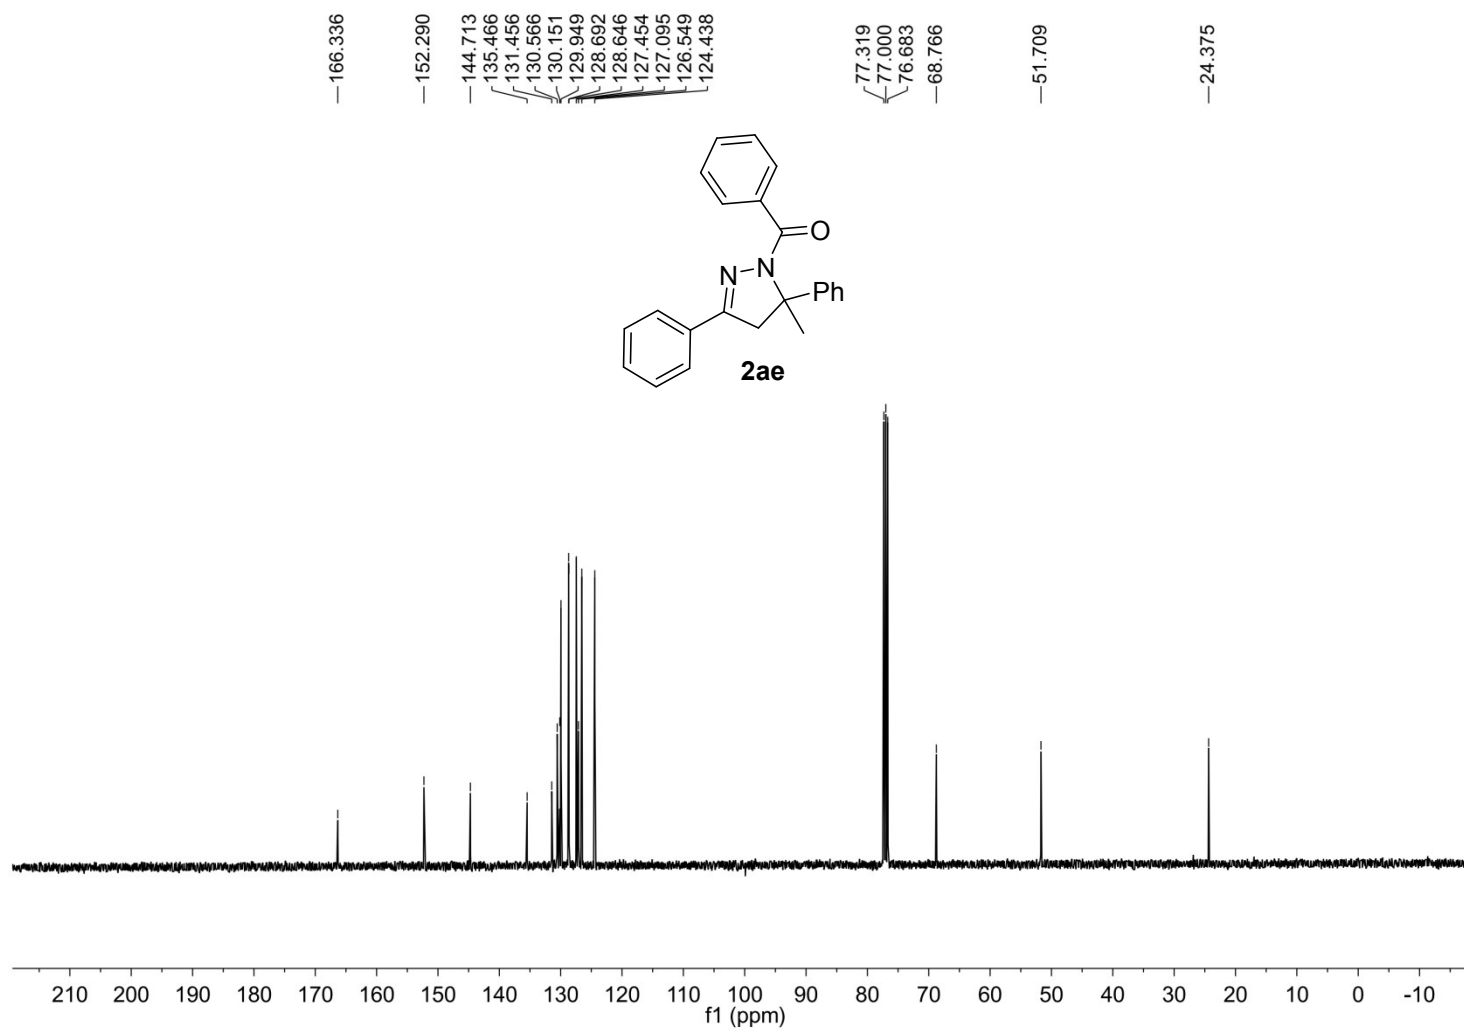

S77

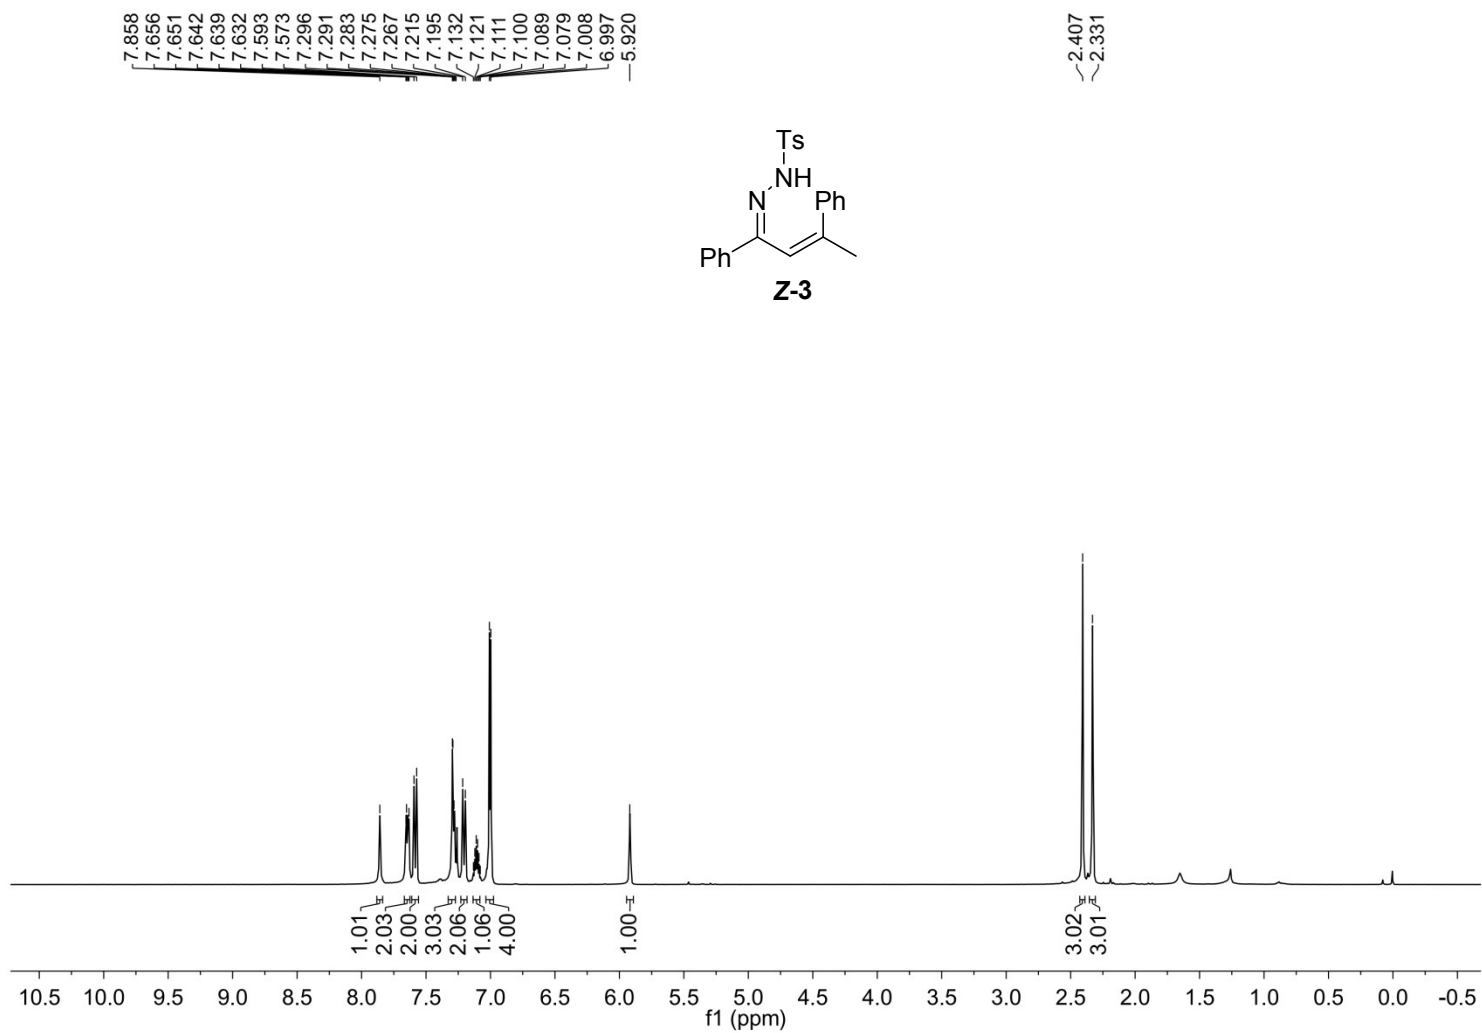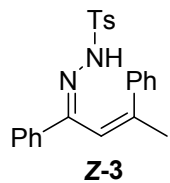

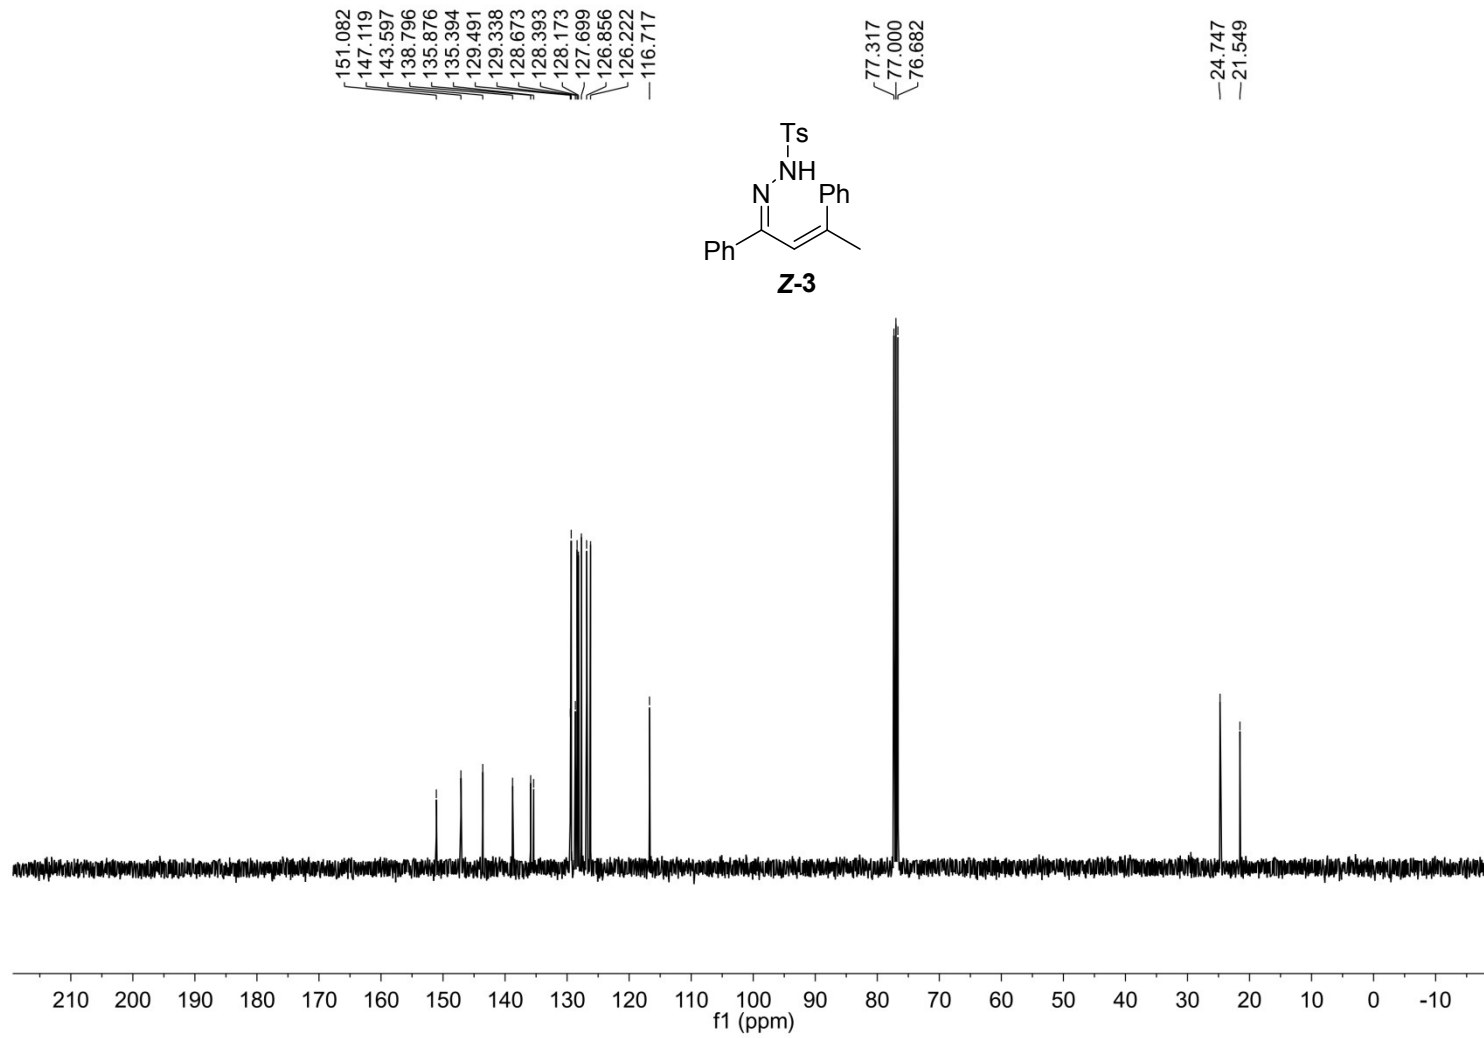

S79

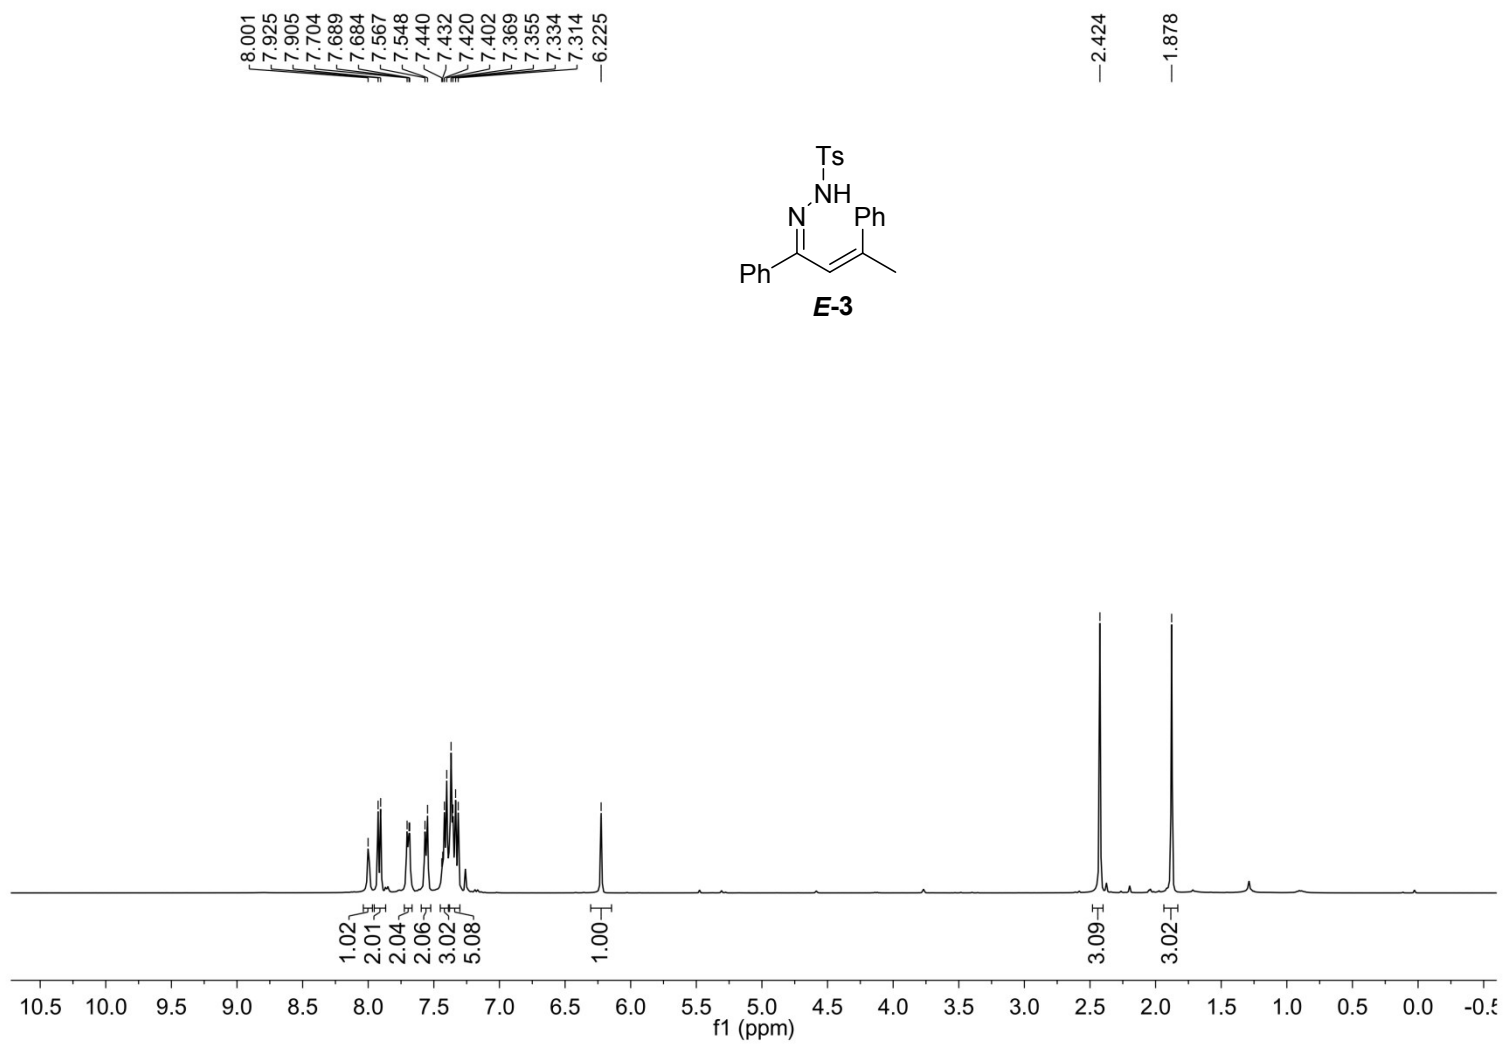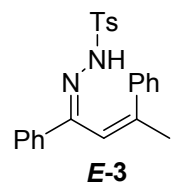

S80



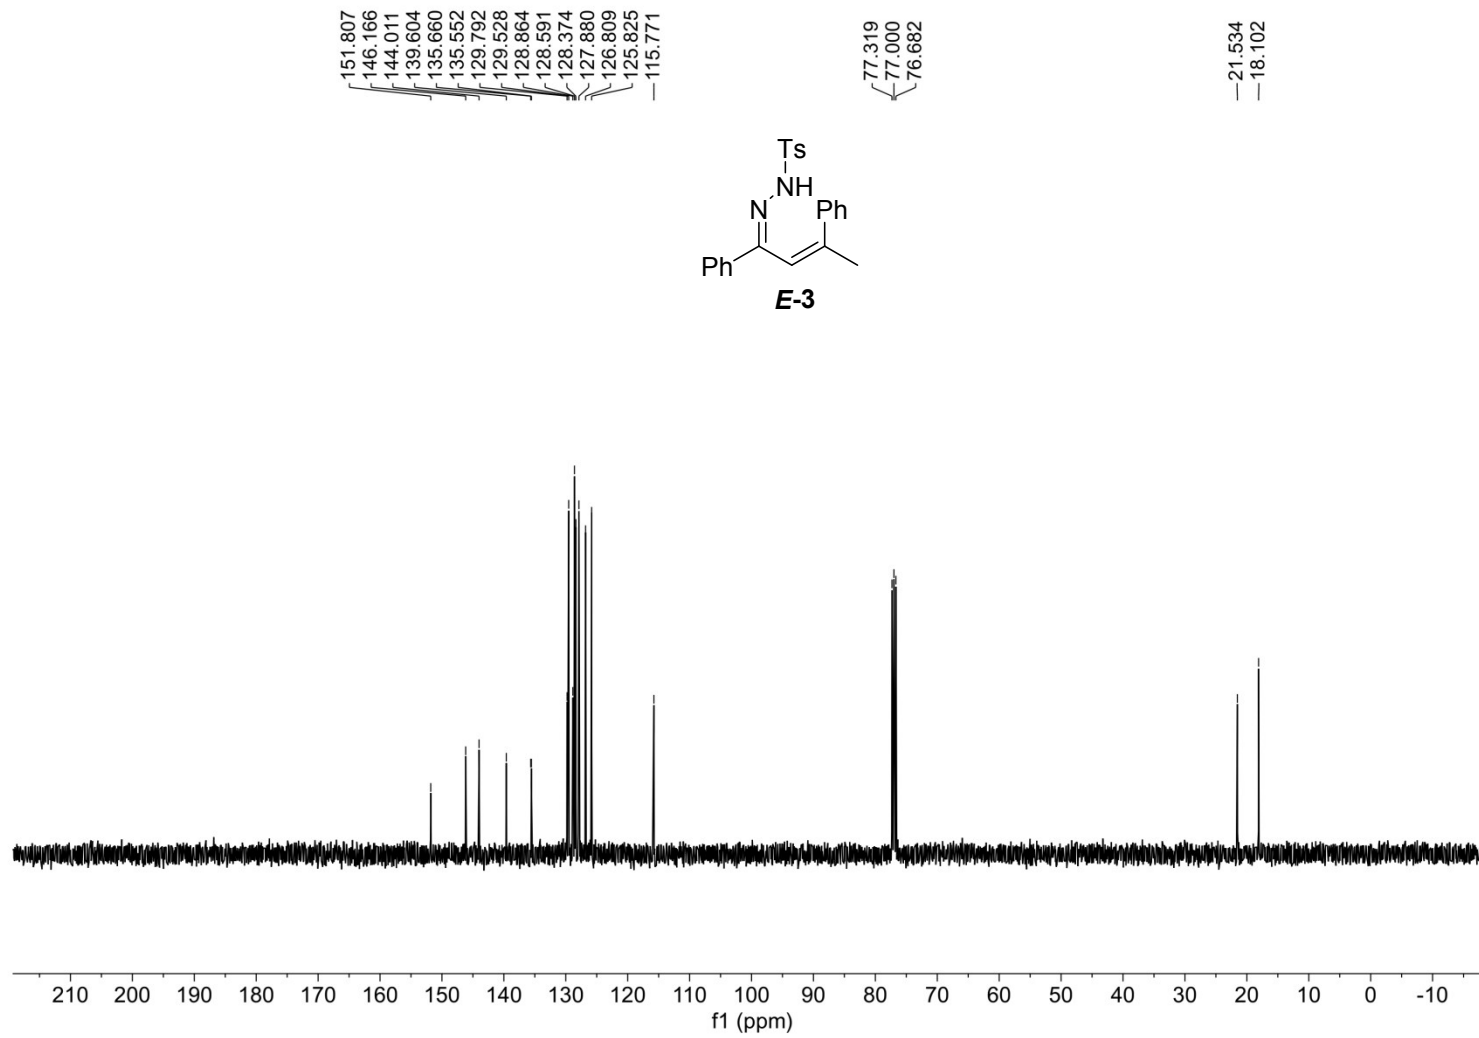

S81
